# Supplementary material for: A hybrid silylene-Pd catalyst: efficient C–N cross-coupling of sterically bulky amines and chiral amines
Source: Royal Society of Chemistry journal article supplement (doi:10.1039/d4cc03108c), 2024-01-01
Supplement: d4cc03108c1.pdf [file d4cc03108c1.pdf]

## Supporting Information

*for*

### **Hybrid silylene-Pd catalyst: efficient C-N cross-coupling of sterically bulky amines and chiral amines**

Sandeep H. Kaulage,<sup>[a]‡</sup> Nasrina Parvin,<sup>[a] ‡</sup> Kishor V. Khopade,<sup>[b]</sup> and Shabana Khan\*<sup>[a]</sup>

<sup>[a]</sup>*Department of Chemistry, Indian Institute of Science Education and Research Pune, Dr. Homi Bhabha Road, Pashan, Pune - 411008, India*

<sup>[b]</sup>*Polymer Science and Engineering division, CSIR-National Chemical Laboratory, Dr. Homi Bhabha Road, Pashan, Pune – 411008, India; Academy of Scientific and Innovative Research (AcSIR), Sector 19, Kamla Nehru Nagar, Ghaziabad 201002, Uttar Pradesh, India.*

\*Email: shabana@iiserpune.ac.in.

## Table of Contents

|                                                                                   |      |
|-----------------------------------------------------------------------------------|------|
| <b>S1. Experimental section</b> -----                                             | S03  |
| <b>S2. Optimization of reaction condition</b> -----                               | S08  |
| <b>S3. Calculations of % <math>V_{bur}</math> and bite angle comparison</b> ----- | S13  |
| <b>S4. Analytical data of C-N coupled products</b> -----                          | S14  |
| <b>S5. Refinement data of single crystal X-ray diffraction</b> -----              | S30  |
| <b>S6. Kinetic experiments</b> -----                                              | S39  |
| <b>S7. NMR spectra</b> -----                                                      | S46  |
| <b>S8. HPLC data</b> -----                                                        | S86  |
| <b>S9. References</b> -----                                                       | S108 |

## S1. Experimental Procedures

All experiments were carried out under an inert gas atmosphere of dinitrogen ( $N_2$ ) using standard Schlenk techniques and in a dinitrogen-filled MBRAUN MB 150-G1 glove box. The solvents used were purified by an MBRAUN solvent purification system (MB SPS-800). 2,6-bis[bis(phenyl)methyl]-4-methylaniline<sup>1</sup> and 2,6-bis[bis(4-tert-butylphenyl) methyl]-4-methylaniline<sup>2a</sup> were prepared by literature methods.  $PNGe^{2b}$ ,  $PNSn^{2b}$ ,  $PNP^{2c}$  and  $IPr^{2d}$  ligands were prepared as per reported procedure. DPEPhos was purchased from Sigma Aldrich and used as it is. All chemicals purchased from Aldrich were used without further purification.  $^1H$ ,  $^{13}C$ , and  $^{19}F$  NMR spectra were recorded in  $CDCl_3$  using a Bruker 400 MHz; all NMR spectra were reported in ppm units with external standard trimethyl silane ( $\delta$  0 ppm) or  $CDCl_3$  ( $\delta$  7.26 ppm). Multiplicities are given as: brs (broad singlet), s (singlet), d (doublet), t (triplet), q (quartet), dd (doublets of doublet), dt (doublets of triplet), td (triplets of doublet) or m (multiplet). Mass spectra were recorded using AB Sciex, 4800 plus MALDI TOF/TOF. HRMS (ESI, APCI) were performed on a Fourier Transform ion cyclotron resonance mass spectrometer. Analytical thin-layer chromatography (TLC) was conducted with TLC plates (Silica gel 60 F<sub>254</sub>) and visualization on TLC was achieved by UV light. Column chromatography was performed on silica gel 200-300 mesh with freshly distilled solvents. Analytical chiral HPLC was performed on an Agilent Technologies 1260 Infinity instrument with Chiralpak AD-H column (250mm X 4.6mm X 5  $\mu$ m). Gradient: Isocratic; Flow rate: 1ml/min; Injection volume: 10  $\mu$ L; UV detection: 254 nm; Column temp.: ambient; Retention times: RT's may vary by  $\pm 1.0$  min. Toluene and THF were refluxed over Na/benzophenone and distilled under an argon atmosphere. Solvents used for column chromatography were of technical grade and used after distillation.

## The purity of chiral amines:

All reagents were obtained commercially and used without further purification. The optical purity of all starting amino compounds is shown below.

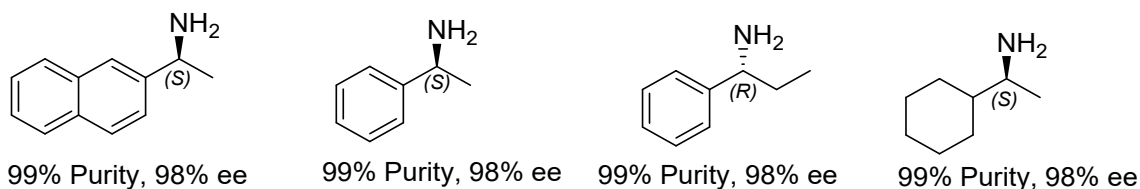

## D) Synthesis of ligand L2 and complex 1-3

### a) Synthesis of L2:

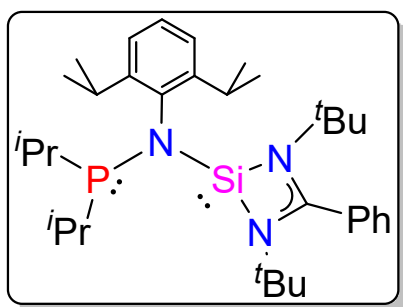

A 100 mL Schlenk flask was charged with chlorosilylene<sup>3</sup> (0.295 g, 1 mmol) and  $\text{LiN}(\text{P}^i\text{Pr}_2)(2,6\text{-}^i\text{Pr}_2\text{C}_6\text{H}_3)$  (0.373 g, 1 mmol) followed by the addition of toluene (30 mL) at room temperature, and stirred for 12 h. The resulting solution was filtered off, and the solvent was removed to yield a white crystalline solid. Single crystals suitable for X-ray analysis were grown in toluene at room temperature. M. P.: 130°C. Yield: 90 % (0.496 g). **<sup>1</sup>H NMR (400 MHz, C<sub>6</sub>D<sub>6</sub>):**  $\delta$  7.33 (d, J = 7.5 Hz, 2H), 7.25 (d, J = 7.4 Hz, 1H), 7.07 (d, J = 8.2 Hz, 1H), 7.04 – 6.93 (m, 2H), 6.93 – 6.85 (m, 2H), 4.43 – 3.68 (m, 2H), 2.92 – 2.58 (m, 2H), 1.48 (d, J = 6.9 Hz, 12H), 1.42 (s, 12H), 1.15 (s, 18H). **<sup>13</sup>C NMR (101 MHz, C<sub>6</sub>D<sub>6</sub>):**  $\delta$  175.93 (s), 147.47 (s), 139.72 (d, J = 1.3 Hz), 130.80 (d, J = 28.2 Hz), 128.86 (s), 127.72 (s), 122.80 (s), 116.18 (s), 54.51 (s), 31.36 (d, J = 2.4 Hz), 27.74 (s), 24.99 (s), 23.18 (s), 21.62 (d, J = 15.8 Hz). **<sup>31</sup>P NMR (162 MHz, C<sub>6</sub>D<sub>6</sub>):**  $\delta$  -39.17 (s). **<sup>29</sup>Si NMR (80 MHz, C<sub>6</sub>D<sub>6</sub>):**  $\delta$  -67.47 (d, J = 14.0 Hz). **HRMS (ESI):** calculated for  $\text{C}_{33}\text{H}_{54}\text{N}_3\text{PSi}$   $[\text{M}]^+$   $m/z$  551.3825, found 551.3269. **MALDI  $m/z$  ( $\text{C}_{33}\text{H}_{54}\text{N}_3\text{PSi}$ ):** 551.85  $[\text{M}]^+$ .

**b) Synthesis of 1:**

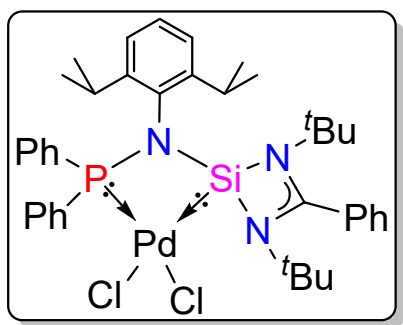

A 100 mL Schlenk flask was charged with **L1**<sup>4</sup> (0.310 g, 0.5 mmol) and PdCl<sub>2</sub>(ACN)<sub>2</sub> (0.130 g, 0.5 mmol) followed by the addition of THF (30 mL) at room temperature and stirred for 3 h. The resulting solution was filtered off, and the solvent was reduced to 3 mL and kept for crystallization at

0° C. M. P.: 210-212°C. Yield: 62 % (0.493 g). <sup>1</sup>H NMR (400 MHz, CDCl<sub>3</sub>): NMR integration is not done due to broadening in the <sup>1</sup>H spectra. <sup>13</sup>C NMR (101 MHz, CDCl<sub>3</sub>): δ 179.7, 146.0, 143.4, 135.1, 135.0, 132.0, 131.6, 130.7, 130.5, 130.1, 128.8, 128.6, 128.5, 128.2, 128.0, 127.7, 126.5, 125.2, 125.1, 122.5, 77.2, 67.8, 56.6, 31.9, 31.2, 30.7, 28.8, 28.2, 28.0, 25.4, 23.4, 21.6, 0.8. <sup>31</sup>P NMR (162 MHz, CDCl<sub>3</sub>): δ 58.04 (s). <sup>29</sup>Si NMR (80 MHz, CDCl<sub>3</sub>): δ -28.82 (d, J = 21.5 Hz). HRMS (ESI): calculated for C<sub>39</sub>H<sub>50</sub>Cl<sub>2</sub>N<sub>3</sub>PPdSi [M]<sup>+</sup> m/z 795.1924, found 795.5019. MALDI m/z (C<sub>39</sub>H<sub>50</sub>Cl<sub>2</sub>N<sub>3</sub>PPdSi): 797.18 [M]<sup>+</sup>.

**c) Synthesis of 2:**

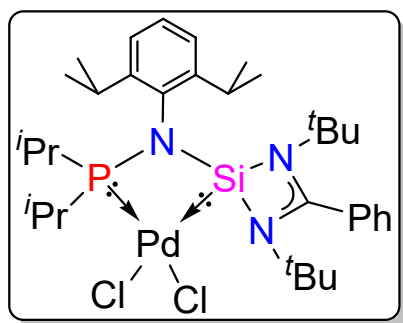

A 100 mL Schlenk flask was charged with **L2** (0.275 g, 0.5 mmol) and PdCl<sub>2</sub>(ACN)<sub>2</sub> (0.130 g, 0.5 mmol) followed by the addition of THF (30 mL) at room temperature and stirred for 3 h. The resulting solution was filtered off, and the solvent was reduced to 3 mL and kept for crystallization at

0° C. M. P.: 227-230°C. Yield: 58 % (0.420 g). <sup>1</sup>H NMR (400 MHz, CDCl<sub>3</sub>): NMR integration is not done due to broadening in the <sup>1</sup>H spectra. <sup>13</sup>C NMR (101 MHz, CDCl<sub>3</sub>): δ 180.1, 146.0, 134.5, 131.9, 131.5, 131.1, 130.2, 129.5, 128.7, 128.4, 128.2, 128.0, 127.2, 125.7, 125.5, 122.8, 68.1, 57.0, 32.2, 31.5, 31.1, 28.8, 28.3, 27.9, 25.7, 23.6, 22.6, 21.7, 17.0, 1.1. <sup>29</sup>Si NMR (80 MHz, CDCl<sub>3</sub>): δ -30.17 (d, J = 17.1 Hz). <sup>31</sup>P NMR (162 MHz, CDCl<sub>3</sub>): δ 95.70 (s). HRMS

(ESI): calculated for  $C_{33}H_{54}Cl_2N_3PPdSi$   $[M]^+$   $m/z$  727.2237, found 727.5298. MALDI  $m/z$  ( $C_{33}H_{54}Cl_2N_3PPdSi$ ): 729.15 $[M]^+$ .

d) Synthesis of 3:

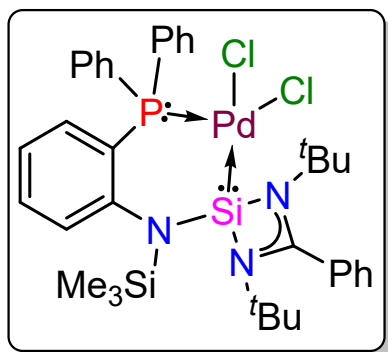

A 100 mL Schlenk flask was charged with **L3**<sup>5</sup> (0.304 g, 0.5 mmol) and  $PdCl_2(ACN)_2$  (0.130 g, 0.5 mmol) followed by the addition of toluene (30 mL) at room temperature and stirred for 12 h. The resulting solution was filtered off, and the solvent was removed to yield a pale yellow solid. Single crystals suitable for X-ray analysis were grown in DCM-

Pentane (2:1) at 0° C. M. P.: 278-281°C. Yield: 48 % (0.375 g). **<sup>1</sup>H NMR (400 MHz, CDCl<sub>3</sub>):**  $\delta$  8.08 (d,  $J = 7.4$  Hz, 1H), 7.57 – 7.31 (m, 15H), 7.05 – 6.95 (m, 2H), 6.65 – 6.54 (m, 2H), 1.14 (s, 9H), 1.07 (s, 9H), 0.04 (s, 9H). **<sup>13</sup>C NMR (101 MHz, CDCl<sub>3</sub>):**  $\delta$  177.18 (s), 150.38 (s), 134.55(s), 133.09 (s), 131.87 (s), 131.38 (s), 129.53 (s), 129.22 (d,  $J = 11.9$  Hz), 128.35 (s), 128.13 (s), 127.81 (s), 126.69 (s), 125.34(s), 124.11 (s), 31.08 (d,  $J = 7.6$  Hz), 4.17 (s). **<sup>31</sup>P NMR (162 MHz, CDCl<sub>3</sub>):**  $\delta$  18.55 (s). **<sup>29</sup>Si NMR (80 MHz, CDCl<sub>3</sub>):**  $\delta$  16.66 (d,  $J = 19.6$  Hz), 11.47 (s). **HRMS (ESI):** calculated for  $C_{36}H_{46}Cl_2N_3PPdSi_2$   $[M-TMSCl]^+$   $m/z$  783.1380, found 674.1420. MALDI  $m/z$  ( $C_{36}H_{46}Cl_2N_3PPdSi_2$ ): 784.14 $[M]^+$ .

---

## II) General procedure C-N coupling

### **A general methodology for C-N cross-coupling reactions with microwave method (A):**

In a glovebox, a microwave tube equipped with a magnetic stir bar was charged with 2.8 eq. NaO<sup>t</sup>Bu, 2 mol% of Pd(dba)<sub>2</sub> and 2 mol% **L1/L2** ligand. 2 mL toluene, 1.2 equiv. amine, and 1 equiv. aromatic halide were added using the Schlenk line. The reaction mixture was stirred for 60 min at 150 °C in a microwave. The crude product was purified by column chromatography to afford the corresponding product. Enantiomeric excess (% ee) was determined by HPLC analysis using chiral stationary phases as indicated for each substrate.

### **A general methodology for C-N cross-coupling reactions using conventional method (B):**

2 mL toluene was added into the mixture of ligand **L1** (0.012 mmol) and Pd(dba)<sub>2</sub> (0.012 mmol) in a 100 mL Schlenk flask and stirred at room temperature for 1 h. 0.625 mmol of aryl halide was added, and 1.75 mmol of NaO<sup>t</sup>Bu and 0.625 mmol of bulky primary aniline were added into this and stirred for 24 h at 100 °C. All the additions were done in an inert atmosphere. The reaction mixture was cooled to room temperature and extracted in ethyl acetate. Sodium sulfate was added as a drying agent. The resulting solution was dried *in vacuo* and purified by column chromatography (n-hexane: ethyl acetate) to afford the expected product. Products obtained as solids were dried under a high vacuum. Analytical thin-layer chromatography was performed on pre-coated silica plates. All the compounds were characterized by NMR spectroscopy and mass spectrometry.

-----

## S2. Optimization of reaction condition

### I) Conventional method

**Table S1:** Optimization of catalyst, base and solvent for the C-N cross-coupling of a sterically bulky aniline<sup>a</sup>

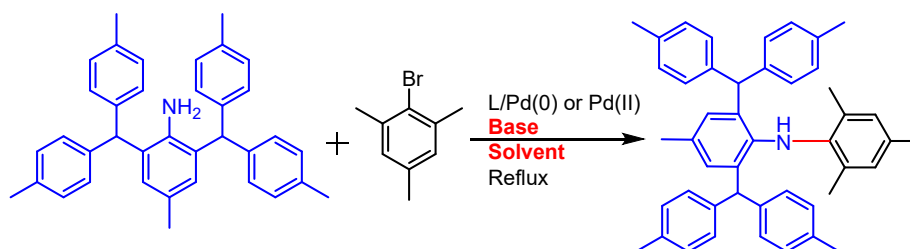

| Entry    | Ligand    | Solvent        | Base                            | Isolated Yield % |
|----------|-----------|----------------|---------------------------------|------------------|
| 1        | L1        | Toluene        | Cs <sub>2</sub> CO <sub>3</sub> | 10               |
| 2        | L1        | Toluene        | NaOH                            | NR               |
| 3        | L1        | Toluene        | K <sub>2</sub> CO <sub>3</sub>  | NR               |
| 4        | L1        | Toluene        | LiO <sup>t</sup> Bu             | 70               |
| 5        | L1        | Toluene        | KO <sup>t</sup> Bu              | 93               |
| <b>6</b> | <b>L1</b> | <b>Toluene</b> | <b>NaO<sup>t</sup>Bu</b>        | <b>99</b>        |
| 7        | L1        | THF            | NaO <sup>t</sup> Bu             | 56               |
| 8        | L1        | Benzene        | NaO <sup>t</sup> Bu             | 94               |
| 9        | L1        | 1,4-dioxane    | NaO <sup>t</sup> Bu             | 95               |

<sup>a</sup>Reaction conditions: aryl amine (0.5 mmol, 1 equiv.), aryl bromide (0.5 mmol, 1 equiv.), base (1.4 mmol, 2.8 equiv.), ligand (0.01 mmol, 2 mol%), [Pd] (0.01 mmol, 2 mol%), solvent (2 mL), and 24 h. All are isolated yields.

**Table S2:** Ligand and catalyst 1, 2, and 3 effect on the C-N cross-coupling of a sterically bulky aniline<sup>a</sup>



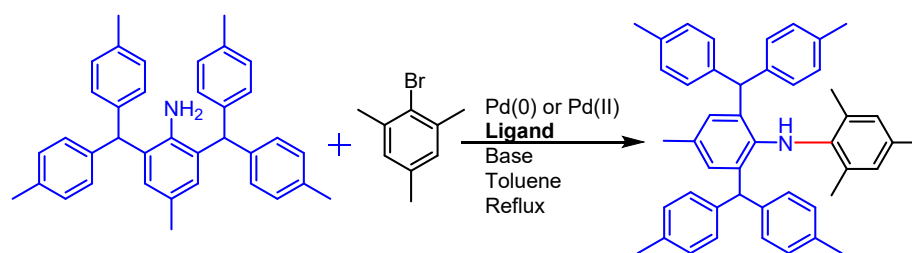

| Entry | Ligand | Solvent | Base   | Isolated Yield % |
|-------|--------|---------|--------|------------------|
| 1     | L1     | Toluene | NaO'Bu | >99              |
| 2     | L2     | Toluene | NaO'Bu | >99              |
| 3     | L3     | Toluene | NaO'Bu | 90               |
| 4     | L4     | Toluene | NaO'Bu | 70               |
| 5     | L5     | Toluene | NaO'Bu | 63               |
| 6     | L6     | Toluene | NaO'Bu | 60               |
| 7     | L7     | Toluene | NaO'Bu | 91               |
| 8     | L8     | Toluene | NaO'Bu | 94               |
| 9     | L9     | Toluene | NaO'Bu | 75               |
| 10    | 1      | Toluene | NaO'Bu | 69               |
| 11    | 2      | Toluene | NaO'Bu | 73               |
| 12    | 3      | Toluene | NaO'Bu | 58               |

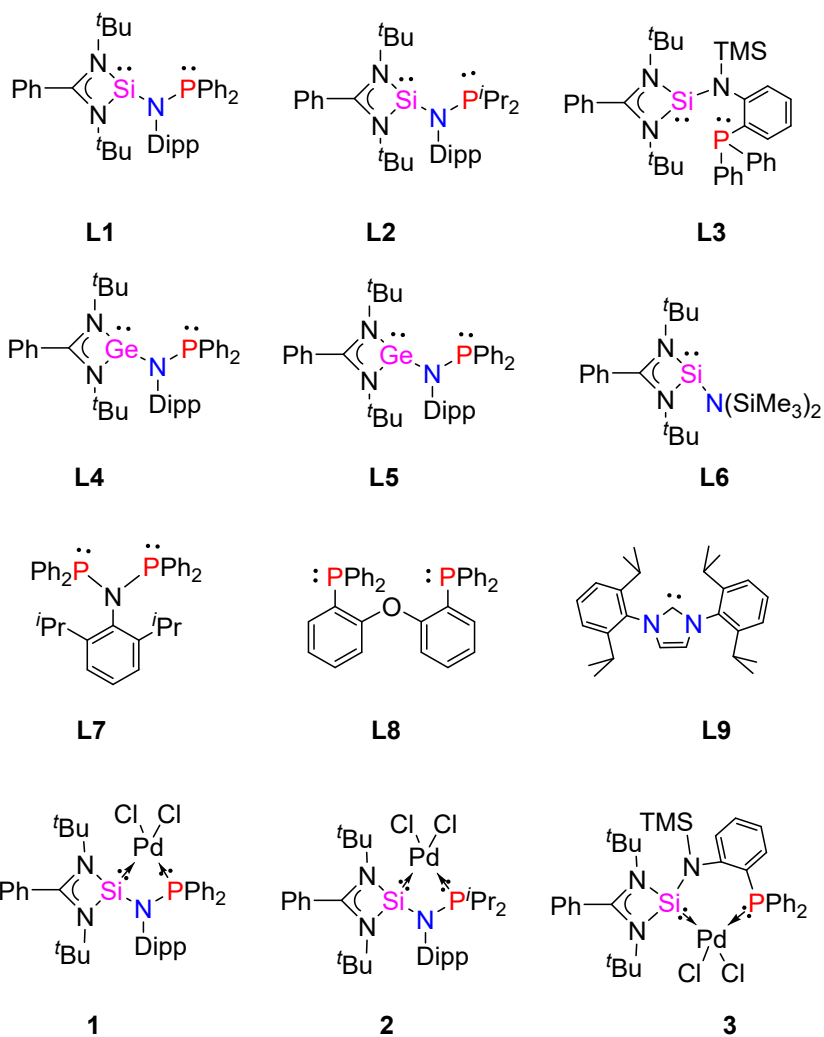

<sup>a</sup>Reaction conditions: aryl amine (0.5 mmol, 1equiv.), aryl bromide (0.5 mmol, 1 equiv.), NaO<sup>t</sup>Bu (1.4 mmol, 2.8 equiv.), ligand (0.01 mmol, 2 mol%), [Pd] (0.01 mmol, 2 mol%), toluene (2 mL), 100 °C and 24 h. All are isolated yields (average of two runs).

---

**Table S3:** Effect of the catalyst loading on the C-N cross-coupling of a sterically bulky aniline<sup>a</sup>

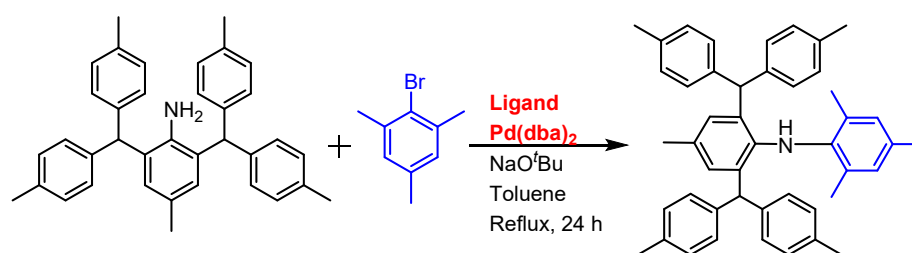

| Entry          | Ligand Mol% | Pd(dba) <sub>2</sub> Mol% | Time (h) | Isolated Yields |
|----------------|-------------|---------------------------|----------|-----------------|
| 1              | 1           | 1                         | 12       | 75              |
| 2              | 1           | 1                         | 20       | 90              |
| 3              | 2           | 2                         | 12       | 85              |
| 4              | 2           | 2                         | 20       | >99             |
| 5 <sup>‡</sup> | 5           | -                         | 20       | 0               |
| 6 <sup>Φ</sup> | -           | 5                         | 20       | 15              |

<sup>a</sup>Reaction Condition: Aryl amine (0.5 mmol, 1equiv.), aryl bromide (0.5 mmol, 1 equiv.), NaO<sup>t</sup>Bu (1.4 mmol, 2.8 equiv.), ligand (0.01 mmol, 2 mol%), [Pd] (0.01 mmol, 2 mol%), toluene (2 mL), 100°C and 24 h. All are isolated yields (average of two runs). <sup>‡</sup>Blank reaction without Pd source. <sup>Φ</sup>Blank reaction with only Pd source.

## II) Microwave method

**Table S4:** Optimization table for microwave-assisted C-N cross-coupling reactions<sup>§</sup>

Screening of microwave-assisted reaction<sup>6</sup> conditions for the coupling of (*S*)-1-phenylpropan-1-amine and 1-bromo-4-(tert-butyl)benzene using **L2**/Pd(dba)<sub>2</sub>.

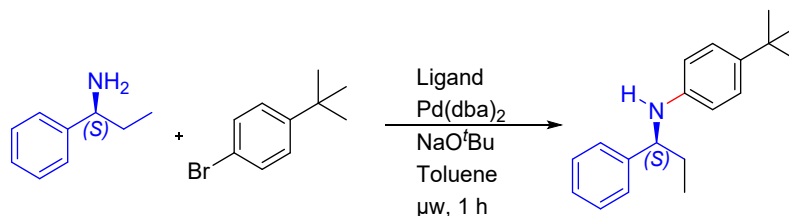

| Entry    | Mol% Pd  | Mol%<br>Ligand | Temp (°C)  | Time (Min) | Isolated Yield <sup>#</sup> % |
|----------|----------|----------------|------------|------------|-------------------------------|
| 1        | 1        | 1              | 150        | 180        | 55                            |
| 2        | 1        | 1              | 150        | 60         | 55                            |
| <b>3</b> | <b>2</b> | <b>2</b>       | <b>150</b> | <b>60</b>  | <b>69</b>                     |
| 4        | -        | 5              | 150        | 60         | NR                            |
| 5        | 5        | -              | 150        | 60         | 19                            |

<sup>§</sup>Reaction conditions: aryl amine= (*S*)-1-phenylpropan-1-amine (1 equiv.), aryl bromide= 1-bromo-4-(tert-butyl)benzene (1 equiv.), **L2**/Pd(dba)<sub>2</sub> (2 mol%), NaO<sup>t</sup>Bu (2.8 equiv.), toluene, μw. <sup>#</sup>Isolated yields (average of two runs). NR : No reaction.

### III) List of Racemic compounds prepared for HPLC

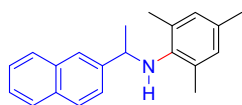

5a'

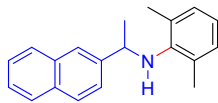

5b'

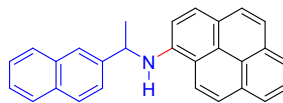

5c'

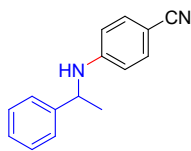

5d'

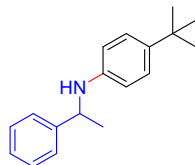

5e'

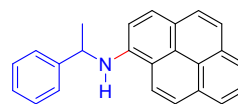

5f'

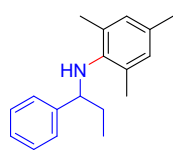

5g'

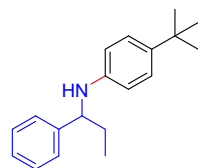

5h'

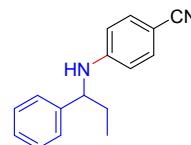

5i'

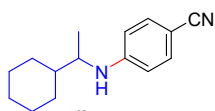

5j'

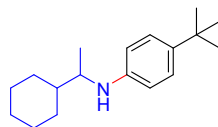

5k'

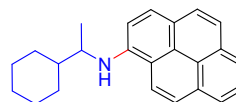

5l'

-----

### S3. Calculations of percentage buried volume and bite angle comparison

To gain insight into steric and electronic factors of 1, 2, and 3, we have performed bite angle<sup>7</sup> measurements from X-ray analysis, and Steric maps measurement from SambVca 2.1.<sup>8</sup> Percentage buried volume are mentioned below in the table.<sup>9</sup>

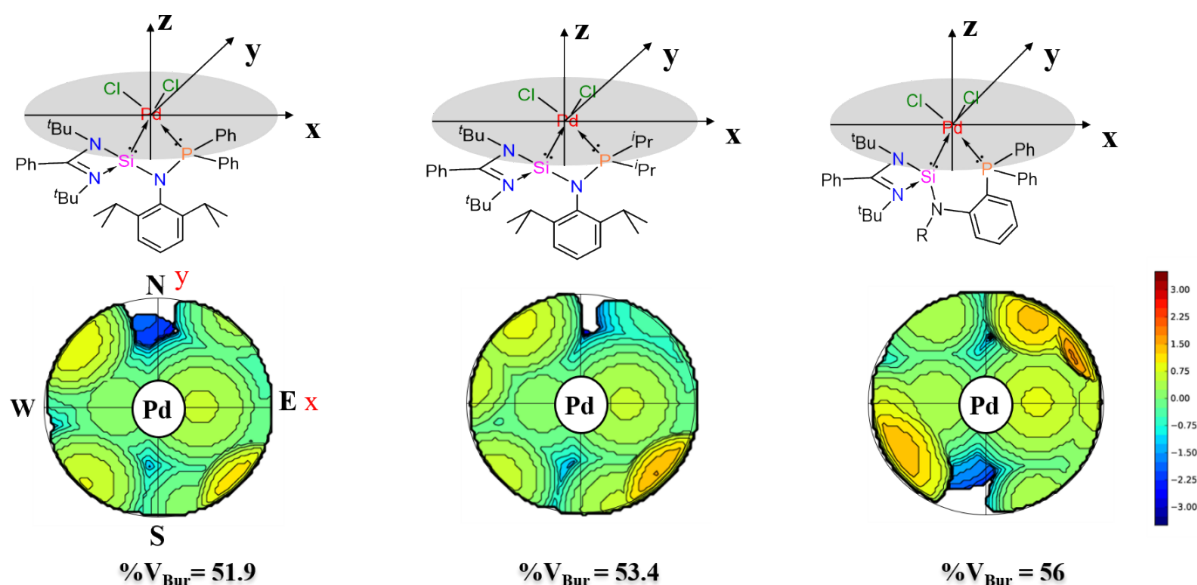

| Catalyst | % $V_{bur}$ | Bite angle | SW   | NW   | NE   | SE   |
|----------|-------------|------------|------|------|------|------|
| 1        | 51.9        | 69.36(4)   | 52.1 | 48.8 | 49.0 | 56.6 |
| 2        | 53.4        | 69.16(2)   | 51.2 | 55.8 | 45.9 | 60.7 |
| 3        | 56.0        | 87.73(2)   | 53.0 | 52.5 | 63.9 | 54.7 |

**Figure S1:** Topographical steric maps of Pd(II) complexes 1 to 3 [SiNP(Pd)Cl<sub>2</sub>] showing % $V_{bur}$  per quadrant.

## S4. Analytical data of products

### I) NMR spectra of bulky amine substrates

#### (4a) *N*-(2,6-diisopropylphenyl)-2,4,6-trimethylaniline

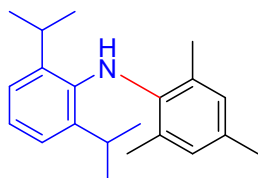

Titled compound prepared according to **General procedure B**. The crude product was purified by column chromatography (0-2% EtOAc in hexane) to provide the aminated product as a white solid in 90% yield (160 mg). **<sup>1</sup>H NMR (400 MHz, CDCl<sub>3</sub>):**  $\delta$  1.15 (*d*, 12H, *J*= 6.9 Hz, CHMe<sub>2</sub>), 2.00 (*s*, 6H, CH<sub>3</sub>), 2.27 (*s*, 3H, CH<sub>3</sub>), 3.13-3.30 (*m*, 2H, CHMe<sub>2</sub>), 4.74 (*s*, 1H, NH), 6.80 (*s*, 2H, Ph), 7.14 (*s*, 3H, Ph) **<sup>13</sup>C{<sup>1</sup>H} NMR (100.613 MHz, CDCl<sub>3</sub>):**  $\delta$  19.38, 20.54, 23.56, 28.08, 123.34, 124.27, 126.43, 129.18, 130.15, 139.28, 140.55, 143.47 ppm. **HRMS (ESI):** calculated for C<sub>21</sub>H<sub>29</sub>N [M+H]<sup>+</sup> *m/z* 296.2378, found 296.2379.

#### (4b) *N*-(2,6-diisopropylphenyl)-2,6-dimethylaniline

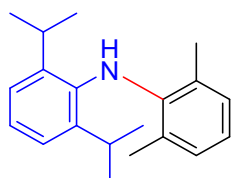

Titled compound prepared according to **General procedure B**. The crude product was purified by column chromatography (0-2% EtOAc in hexane) to provide the aminated product as an off-white solid in 86% yield (210 mg). **<sup>1</sup>H NMR (400 MHz, CDCl<sub>3</sub>):**  $\delta$  1.16 (*d*, 12H, *J*= 6.9 Hz, CHMe<sub>2</sub>), 2.02 (*s*, 6H, CH<sub>3</sub>), 3.14-3.24 (*m*, 2H, CHMe<sub>2</sub>), 4.83 (*s*, 1H, NH), 6.76 (*t*, 1H, *J*= 7.4 Hz, Ph), 6.97 (*d*, 2H, *J*= 7.4 Hz, Ph), 7.12-7.21 (*m*, 3H, Ph) **<sup>13</sup>C{<sup>1</sup>H} NMR (100.613 MHz, CDCl<sub>3</sub>):**  $\delta$  19.48, 23.59, 28.18, 29.85, 119.72, 123.37, 124.95, 125.75, 129.64, 138.92, 143.26, 144.28. **HRMS (ESI):** calculated for C<sub>20</sub>H<sub>27</sub>N [M+H]<sup>+</sup> *m/z* 282.2215, found 282.2219.

**(4c) *N*-(2-fluorophenyl)-2,6-diisopropylaniline**

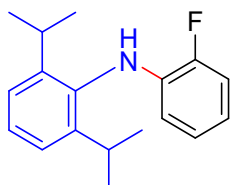

Titled compound prepared according to **General procedure B**. The crude product was purified by column chromatography (5% EtOAc in hexane) to provide the aminated product as a yellow syrup in 96% yield (156 mg).  $^1\text{H NMR}$  (400 MHz,  $\text{CDCl}_3$ ):  $\delta$  1.18 (*d*, 12H,  $J$ = 6.9 Hz,  $\text{CHMe}_2$ ), 3.16-3.26 (*m*, 2H,  $\text{CHMe}_2$ ), 5.34 (*s*, 1H, *NH*), 6.20-6.24 (*m*, 1H, Ph), 6.63-6.69 (*m*, 1H, Ph), 6.85-6.89 (*m*, 1H, Ph), 7.05-7.10 (*m*, 1H, Ph), 7.26-7.29 (*m*, 2H, Ph), 7.33-7.37 (*m*, 1H, Ph)  $^{13}\text{C}\{^1\text{H}\}$  NMR (100.613 MHz,  $\text{CDCl}_3$ ):  $\delta$  14.22, 23.94, 28.29, 29.80, 113.20, 114.58, 114.76, 117.06, 117.13, 124.00, 124.49, 127.69, 128.21, 134.22, 136.46, 136.57, 147.83, 149.94, 152.31 ppm.  $^{19}\text{F}\{^1\text{H}\}$  NMR (376.66 MHz,  $\text{CDCl}_3$ ):  $\delta$  -137.41 ppm. MALDI *m/z* ( $\text{C}_{18}\text{H}_{22}\text{FN}$ ): 271.81  $[\text{M}]^+$ .

**(4d) *N*-(3,5-bis(trifluoromethyl)phenyl)-2,6-diisopropylaniline**

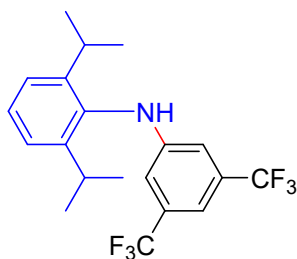

Titled compound prepared according to **General procedure B**. The crude product was purified by column chromatography (10% EtOAc in hexane) to provide the aminated product as a yellow syrup in 97% yield (228 mg).  $^1\text{H NMR}$  (400 MHz,  $\text{CDCl}_3$ ):  $\delta$  1.17 (*d*, 12H,  $J$ = 6.9 Hz,  $\text{CHMe}_2$ ), 3.06-3.16 (*m*, 2H,  $\text{CHMe}_2$ ), 5.53 (*s*, 1H, *NH*), 6.85 (*s*, 2H, Ph), 7.19 (*s*, 1H, Ph), 7.28-7.29 (*m*, 2H, Ph), 7.37-7.41 (*m*, 1H, Ph)  $^{13}\text{C}\{^1\text{H}\}$  NMR (100.613 MHz,  $\text{CDCl}_3$ ):  $\delta$  23.79, 28.35,



29.71, 124.40, 128.50, 132.35, 132.70, 147.40, 148.93 ppm.  $^{19}\text{F}\{^1\text{H}\}$  NMR (376.66 MHz,  $\text{CDCl}_3$ ):  $\delta$  -63.21 ppm. MALDI  $m/z$  ( $\text{C}_{20}\text{H}_{21}\text{NF}_6$ ): 392.27 ( $\text{M}+3\text{H}$ ) $^+$ .

**(4e) 2,6-dibenzhydryl-*N*-mesityl-4-methylaniline**

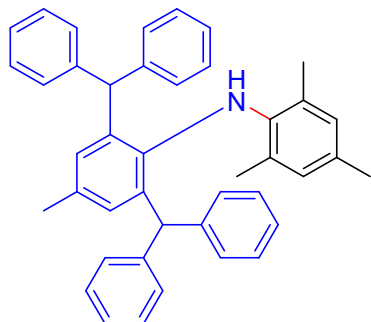

Titled compound prepared according to **General procedure B**. The crude product was purified by column chromatography (2% EtOAc in hexane) to provide the aminated product as a white crystalline solid in 85% yield (284 mg).  $^1\text{H}$  NMR (400 MHz,  $\text{CDCl}_3$ ):  $\delta$  1.44 (*s*, 6H,  $\text{CH}_3$ ), 2.12 (*s*, 3H,  $\text{CH}_3$ ), 2.24 (*s*, 3H,  $\text{CH}_3$ ), 4.11 (*s*, 1H, NH), 5.51 (*s*, 2H,  $\text{CHPh}_2$ ), 6.47 (*s*, 2H, Ph), 6.70 (*m*, 2H, Ph), 6.90 (*d*, 8H,  $J = 6.7$  Hz, Ph), 7.16-7.26 (*m*, 12H, Ph) ppm.  $^{13}\text{C}\{^1\text{H}\}$  NMR (100.613 MHz,  $\text{CDCl}_3$ ):  $\delta$  18.45, 20.46, 21.41, 52.23, 125.88, 126.18, 128.18, 128.95, 129.10, 129.48, 129.55, 131.71, 137.52, 138.47, 138.73, 143.58 ppm. MALDI  $m/z$  ( $\text{C}_{42}\text{H}_{39}\text{N}$ ): 557.54 [ $\text{M}$ ] $^+$ .

**(4f) 2,6-dibenzhydryl-*N*-(2,6-dimethylphenyl)-4-methylaniline**

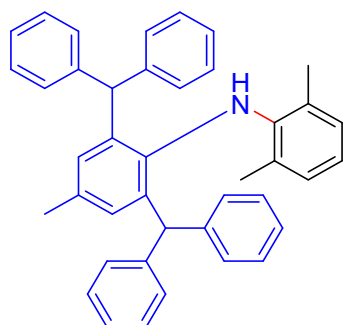

Titled compound prepared according to **General procedure B**. The crude product was purified by column chromatography (5% EtOAc in hexane) to provide the aminated product as a white powder in 99% yield (322 mg).  $^1\text{H}$  NMR (400 MHz,  $\text{CDCl}_3$ ):  $\delta$  1.46 (*s*, 6H,  $\text{CH}_3$ ), 2.14 (*s*,

3H,  $CH_3$ ), 4.19 (*s*, 1H, *NH*), 5.52 (*s*, 2H,  $CHPh_2$ ), 6.50 (*s*, 2H, Ph), 6.68-6.77 (*m*, 1H, Ph), 6.91 (*d*, 8H,  $J=7.1$  Hz, Ph), 7.15-7.30 (*m*, 12H, Ph) ppm.  $^{13}C\{^1H\}$  NMR (100.613 MHz,  $CDCl_3$ ):  $\delta$  18.49, 21.43, 29.71, 52.30, 119.57, 125.46, 126.23, 128.22, 128.98, 129.04, 129.46, 132.27, 137.20, 138.97, 141.29, 143.54 ppm. MALDI  $m/z$  ( $C_{41}H_{37}N$ ): 543.41  $[M]^+$ .

**(4g) 2,6-dibenzhydryl-*N*-(2-fluorophenyl)-4-methylaniline**

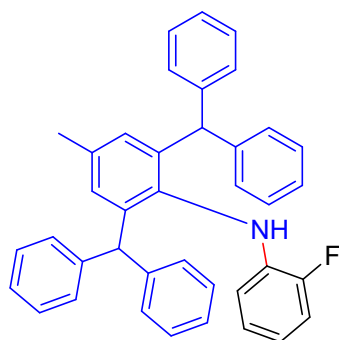

Titled compound prepared according to **General procedure B**. The crude product was purified by column chromatography (10% EtOAc in hexane) to provide the aminated product as a white solid in 98% yield (313 mg).  $^1H$  NMR (400 MHz,  $CDCl_3$ ):  $\delta$  2.19 (*s*, 3H,  $CH_3$ ), 4.73 (*s*, 1H, *NH*), 5.60 (*s*, 2H,  $CHPh_2$ ), 6.28-6.41 (*m*, 1H, Ph), 6.59-6.68 (*m*, 1H, Ph), 6.72 (*s*, 2H, Ph), 6.79-6.87 (*m*, 1H, Ph), 6.92-7.04 (*m*, 8H, Ph), 7.14-7.23 (*m*, 13H, Ph)  $^{13}C\{^1H\}$  NMR (100.613 MHz,  $CDCl_3$ ):  $\delta$  21.75, 51.82, 112.92, 114.75, 114.93, 117.32, 117.38, 124.60, 126.21, 128.33, 129.38, 129.89, 134.12, 136.64, 143.34, 144.22  $^{19}F\{^1H\}$  NMR (376.66 MHz,  $CDCl_3$ ):  $\delta$  -136.75 (*s*) MALDI  $m/z$  ( $C_{39}H_{32}FN$ ): 533.45  $[M]^+$ .

**(4h) 2,6-dibenzhydryl-*N*-(3,5-bis(trifluoromethyl)phenyl)-4-methylaniline**

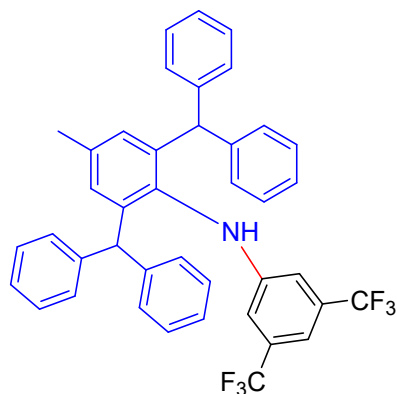

Titled compound prepared according to **General procedure B**. The crude product was purified by column chromatography (15% EtOAc in hexane) to provide the aminated product as an off-white solid in 95% yield (371 mg).  $^1\text{H NMR}$  (400 MHz,  $\text{CDCl}_3$ ):  $\delta$  2.20 (s, 3H,  $\text{CH}_3$ ), 4.82 (s, 1H,  $\text{NH}$ ), 5.45 (s, 2H,  $\text{CHPh}_2$ ), 6.64 (s, 2H, Ph), 6.70 (s, 2H, Ph), 6.90-6.92 (m, 8H, Ph), 7.09-7.24 (m, 13H, Ph)  $^{13}\text{C}\{^1\text{H}\}$  NMR (100.613 MHz,  $\text{CDCl}_3$ ):  $\delta$  21.72, 52.12, 126.48, 128.42, 129.16, 130.09, 132.92, 137.65, 142.70, 143.94, 147.98  $^{19}\text{F}\{^1\text{H}\}$  NMR (376.66 MHz,  $\text{CDCl}_3$ ):  $\delta$  -63.08 (s) MALDI  $m/z$  ( $\text{C}_{41}\text{H}_{31}\text{NF}_6$ ): 651.35  $[\text{M}]^+$ .

**(4i) *N*-(2,6-bis(di-*p*-tolylmethyl)-4-methylphenyl)-2,4,6-trimethylaniline**

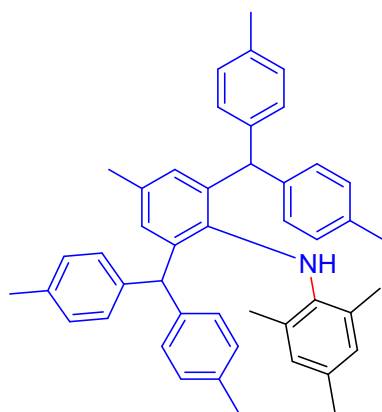

Titled compound prepared according to **General procedure B**. The crude product was purified by column chromatography (5% EtOAc in hexane) to provide the aminated product as white needles in a 99% yield (364 mg).  $^1\text{H NMR}$  (400 MHz,  $\text{CDCl}_3$ ):  $\delta$  1.52 (s, 6H,  $\text{CH}_3$ ), 2.16 (s, 3H,  $\text{CH}_3$ ), 2.26 (s, 3H,  $\text{CH}_3$ ), 2.35 (s, 12H,  $\text{CH}_3$ ), 4.20 (s, 1H,  $\text{NH}$ ), 5.48 (s, 2H,  $\text{CHPh}_2$ ), 6.54 (s, 2H, Ph), 6.73 (s, 2H, Ph), 6.81 (d, 8H,  $J=8.0$  Hz, Ph), 7.06 (d, 8H,  $J=7.8$  MHz, Ph)  $^{13}\text{C}\{^1\text{H}\}$  NMR (100.613 MHz,  $\text{CDCl}_3$ ):  $\delta$  18.62, 20.53, 21.12, 21.50, 51.43, 126.08, 128.89, 128.99, 129.36, 129.58, 131.63, 135.52, 137.67, 138.79, 139.07, 140.94 MALDI  $m/z$  ( $\text{C}_{46}\text{H}_{47}\text{N}$ ): 613.46  $[\text{M}]^+$ .

**(4j) 2,6-bis(di-*p*-tolylmethyl)-*N*-(2,6-dimethylphenyl)-4-methylaniline**

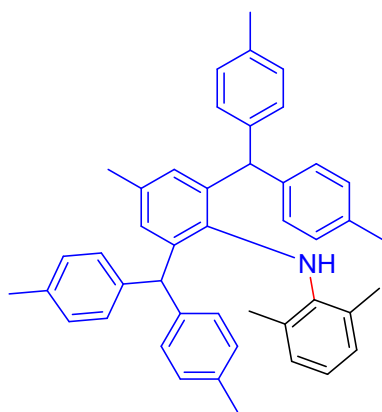

Titled compound prepared according to **General procedure B**. The crude product was purified by column chromatography (5% EtOAc in hexane) to provide the aminated product as an off-white solid in 96% yield (345 mg)  $^1\text{H NMR}$  (400 MHz,  $\text{CDCl}_3$ ):  $\delta$  1.49 (*s*, 6H,  $\text{CH}_3$ ), 2.15 (*s*, 3H,  $\text{CH}_3$ ), 2.33 (*s*, 12H,  $\text{CH}_3$ ), 4.24 (*s*, 1H,  $\text{NH}$ ), 5.45 (*s*, 2H,  $\text{CHPh}_2$ ), 6.52 (*s*, 2H, Ph), 6.66-6.73 (*m*, 1H, Ph), 6.78 (*d*, 8H,  $J = 7.7$  Hz, Ph), 6.90 (*d*, 2H,  $J = 7.2$  Hz, Ph), 7.04 (*d*, 8H,  $J = 7.5$  Hz, Ph)  $^{13}\text{C}\{^1\text{H}\}$  NMR (100.613 MHz,  $\text{CDCl}_3$ ):  $\delta$  18.67, 21.13, 21.47, 29.80, 51.50, 119.49, 125.61, 128.93, 129.02, 129.34, 132.20, 135.58, 137.31, 139.30, 140.88, 141.61 **MALDI  $m/z$  ( $\text{C}_{45}\text{H}_{45}\text{N}$ ):** 599.47  $[\text{M}]^+$ .

**(4k) 2,6-bis(di-*p*-tolylmethyl)-*N*-(2-fluorophenyl)-4-methylaniline**

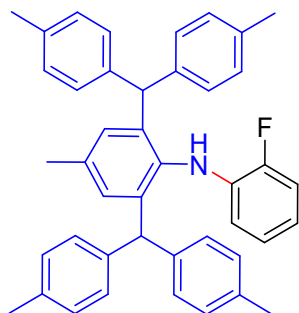

Titled compound prepared according to **General procedure B**. The crude product was purified by column chromatography (12% EtOAc in hexane) to provide the aminated product as a white microcrystalline solid in 96% yield (339 mg).  $^1\text{H NMR}$  (400 MHz,  $\text{CDCl}_3$ ):  $\delta$  2.20 (*s*, 3H,  $\text{CH}_3$ ), 2.31 (*s*, 12H,  $\text{CH}_3$ ), 4.80 (*s*, 1H,  $\text{NH}$ ), 5.53 (*s*, 2H,  $\text{CHPh}_2$ ), 6.75 (*s*, 2H, Ph), 6.85-6.87 (*m*, 9H, Ph), 7.02-7.04 (*m*, 11H, Ph)  $^{13}\text{C}\{^1\text{H}\}$  NMR (100.613 MHz,  $\text{CDCl}_3$ ):  $\delta$  21.03, 21.69,

50.92, 113.01, 114.61, 114.78, 124.48, 128.30, 128.91, 129.15, 129.60, 130.13, 133.99, 135.58, 140.58, 144.28.  $^{19}\text{F}\{^1\text{H}\}$  NMR (376.66 MHz,  $\text{CDCl}_3$ ):  $\delta$  -136.78 (s) MALDI  $m/z$  ( $\text{C}_{43}\text{H}_{40}\text{FN}$ ): 590.57  $[\text{M}+\text{H}]^+$ .

**(4l) *N*-(3,5-bis(trifluoromethyl)phenyl)-2,6-bis(di-*p*-tolylmethyl)-4-methylaniline**

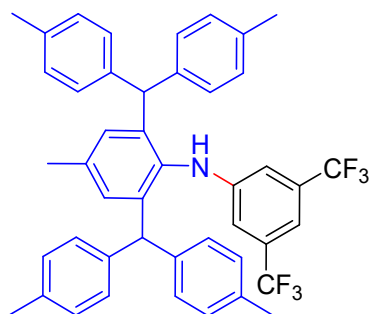

Titled compound prepared according to **General procedure B**. The crude product was purified by column chromatography (20% EtOAc in hexane) to provide the aminated product as a brownish solid in 95% yield (402 mg).  $^1\text{H}$  NMR (400 MHz,  $\text{CDCl}_3$ ):  $\delta$  2.24 (s, 3H,  $\text{CH}_3$ ), 2.32 (s, 12H,  $\text{CH}_3$ ), 4.90 (s, 1H, NH), 5.40 (s, 2H,  $\text{CHPh}_2$ ), 6.66 (s, 2H, Ph), 6.75 (s, 2H, Ph), 6.82 (d, 8H,  $J=8.0$  Hz, Ph), 7.04 (d, 8H,  $J=7.9$  Hz, Ph), 7.15 (s, 1H, Ph)  $^{13}\text{C}\{^1\text{H}\}$  NMR (100.613 MHz,  $\text{CDCl}_3$ ):  $\delta$  20.97, 21.73, 51.32, 128.99, 129.07, 129.91, 132.87, 135.89, 137.44, 139.93, 144.08, 148.12.  $^{19}\text{F}\{^1\text{H}\}$  NMR (376.66 MHz,  $\text{CDCl}_3$ ):  $\delta$  -63.16 (s) MALDI  $m/z$  ( $\text{C}_{45}\text{H}_{39}\text{NF}_6$ ): 707.44  $[\text{M}]^+$ .

**(4m) 2,6-bis(bis(4-(*tert*-butyl)phenyl)methyl)-*N*-mesityl-4-methylaniline**

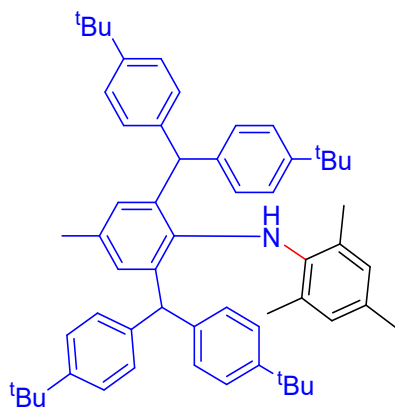

Titled compound prepared according to **General procedure B**. The crude product was purified by column chromatography (5% EtOAc in hexane) to provide the aminated product as a white powder in 99% yield (464 mg).  $^1\text{H NMR}$  (400 MHz,  $\text{CDCl}_3$ ):  $\delta$  1.22 (s, 36H,  $\text{CH}_3$ ), 1.31 (s, 6H,  $\text{CH}_3$ ), 2.11 (s, 3H,  $\text{CH}_3$ ), 2.19 (s, 3H,  $\text{CH}_3$ ), 4.03 (s, 1H, NH), 5.34 (s, 2H,  $\text{CHPh}_2$ ), 6.45 (s, 2H, Ph), 6.62 (s, 2H, Ph), 6.79 (dd, 8H,  $J= 8.3, 1.9$  Hz, Ph), 7.20 (dd, 8H,  $J= 8.3, 1.9$  Hz, Ph)  $^{13}\text{C}\{^1\text{H}\}$  NMR (100.613 MHz,  $\text{CDCl}_3$ ):  $\delta$  18.26, 20.56, 21.47, 31.49, 34.50, 51.54, 125.01, 125.85, 128.67, 128.83, 129.16, 129.40, 131.28, 137.42, 138.58, 138.80, 140.69, 148.79 MALDI  $m/z$  ( $\text{C}_{58}\text{H}_{71}\text{N}$ ): 782.71  $[\text{M}]^+$ .

**(4n) 2,6-bis(bis(4-(*tert*-butyl)phenyl)methyl)-*N*-(2,6-dimethylphenyl)-4-methylaniline**

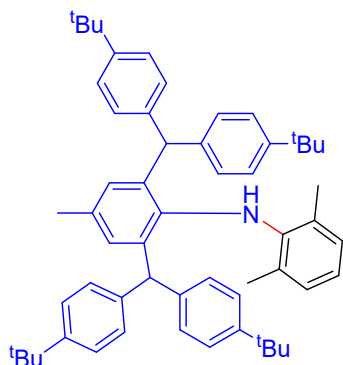

Titled compound prepared according to **General procedure B**. The crude product was purified by column chromatography (5% EtOAc in hexane) to provide the aminated product as a yellow solid in 98% yield (450 mg).  $^1\text{H NMR}$  (400 MHz,  $\text{CDCl}_3$ ):  $\delta$  1.30 (s, 36H,  $\text{CH}_3$ ), 1.58 (s, 6H,  $\text{CH}_3$ ), 2.24 (s, 3H,  $\text{CH}_3$ ), 4.94 (s, 1H, NH), 5.59 (s, 2H,  $\text{CHPh}_2$ ), 6.55-6.62 (m, 1H, Ph), 6.72-6.76 (m, 1H, Ph) 6.82 (s, 2H, Ph), 6.92 (d, 8H,  $J= 7.7$ , Ph), 6.97-7.03 (m, 1H, Ph), 7.23 (d, 8H,  $J= 7.9$  Hz, Ph)  $^{13}\text{C}\{^1\text{H}\}$  NMR (100.613 MHz,  $\text{CDCl}_3$ ):  $\delta$  21.70, 31.38, 34.33, 50.68, 124.99, 128.89, 129.57, 134.02, 136.31, 140.37, 144.41, 148.70 MALDI  $m/z$  ( $\text{C}_{57}\text{H}_{69}\text{N}$ ): 767.83  $[\text{M}]^+$ .

**(4o) 2,6-bis(bis(4-(*tert*-butyl)phenyl)methyl)-*N*-(2-fluorophenyl)-4-methylaniline**

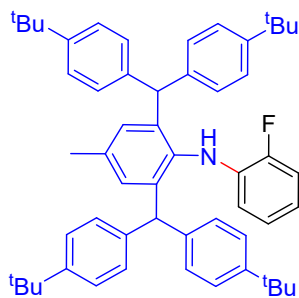

Titled compound prepared according to **General procedure B**. The crude product was purified by column chromatography (10 % EtOAc in hexane) to provide the aminated product as a pale yellowish solid in 80 % yield (363 mg).  $^1\text{H NMR}$  (400 MHz,  $\text{CDCl}_3$ ):  $\delta$  1.27 (*s*, 36H,  $\text{CH}_3$ ), 2.23 (*s*, 3H,  $\text{CH}_3$ ), 4.92 (*s*, 1H,  $\text{NH}$ ), 5.57 (*s*, 2H,  $\text{CHPh}_2$ ), 6.19 (*s*, 1H, ArF), 6.71 (*s*, 1H, ArF), 6.80 (*s*, 2H, Ph), 6.89 (*d*, 2H,  $J=7.4$  Hz, Ph), 6.79 (*dd*, 8H,  $J=8.3, 1.9$  Hz, Ph), 7.23 (*d*, 8H,  $J=7.4$  Hz, Ph)  $^{13}\text{C}\{^1\text{H}\}$  NMR (100.613 MHz,  $\text{CDCl}_3$ ):  $\delta$  21.78, 31.47, 34.41, 50.75, 125.08, 128.98, 129.65, 134.09, 136.40, 140.45, 144.50, 148.78.  $^{19}\text{F}\{^1\text{H}\}$  NMR (376.66 MHz,  $\text{CDCl}_3$ ):  $\delta$  -137.14 (*s*) MALDI:  $m/z$  ( $\text{C}_{55}\text{H}_{67}\text{NF}$ ): 758.68  $[\text{M}]^+$ .

**(4p) 2,6-bis(bis(4-(*tert*-butyl)phenyl)methyl)-*N*-(3,5-bis(trifluoromethyl)phenyl)-4-methylaniline**

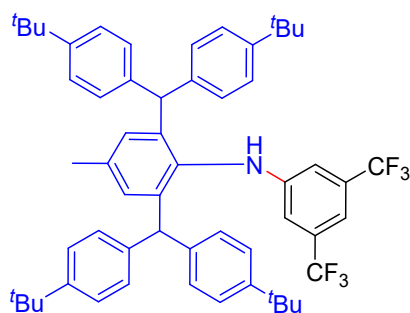

Titled compound prepared according to **General procedure B**. The crude product was purified by column chromatography (0-2 % EtOAc in hexane) to provide the aminated product as an off-white colored solid in 95 % yield (510 mg).  $^1\text{H NMR}$  (400 MHz,  $\text{CDCl}_3$ ):  $\delta$  2.24 (*s*, 3H,  $\text{CH}_3$ ), 2.32 (*s*, 12H,  $\text{CH}_3$ ), 4.90 (*s*, 1H,  $\text{NH}$ ), 5.40 (*s*, 2H,  $\text{CHPh}_2$ ), 6.66 (*s*, 2H, Ph), 6.75 (*s*, 2H, Ph), 6.82 (*d*, 8H,  $J=8.0$  Hz, Ph), 7.04 (*d*, 8H,  $J=7.9$  Hz, Ph), 7.15 (*s*, 1H, Ph)  $^{13}\text{C}\{^1\text{H}\}$  NMR

(100.613 MHz, CDCl<sub>3</sub>):  $\delta$  21.83, 31.41, 34.43, 51.16, 125.25, 128.81, 130.12, 132.98, 137.50, 139.96, 144.14, 148.40, 149.12 <sup>19</sup>F{<sup>1</sup>H} NMR (376.66 MHz, CDCl<sub>3</sub>):  $\delta$  -63.03 (s) MALDI *m/z* (C<sub>57</sub>H<sub>63</sub>NF<sub>6</sub>): 876.86 [M]<sup>+</sup>.

## II) NMR spectra of Chiral substrates

### (5a) (S)-2,4,6-trimethyl-N-(1-(naphthalen-2-yl)ethyl)aniline

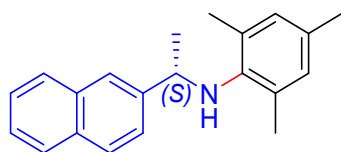

Titled compound prepared according to **General procedure A**. The crude product was purified by column chromatography (2 % EtOAc in hexane) to provide the aminated product as a yellow solid in L1: 56 %, L2: 62% yield. <sup>1</sup>H NMR (400 MHz, CDCl<sub>3</sub>):  $\delta$  8.06 (dd, *J* = 6.3, 3.5 Hz, 1H), 7.91 – 7.86 (m, 1H), 7.77 (dd, *J* = 15.5, 7.6 Hz, 2H), 7.56 – 7.46 (m, 3H), 6.82 (s, 2H), 5.11 (q, *J* = 6.7 Hz, 1H), 3.37 (brs, 1H), 2.25 (s, 3H), 2.22 (s, 6H), 1.60 (d, *J* = 6.7 Hz, 3H). <sup>13</sup>C NMR (101 MHz, CDCl<sub>3</sub>):  $\delta$  143.49 (s), 142.79 (s), 134.31 (s), 131.24 (s), 131.09 (s), 130.02 (s), 129.48 (s), 129.28 (s), 127.78 (s), 126.33 (s), 126.08 (s), 125.87 (s), 123.59 (s), 123.00 (s), 53.70 (s), 24.40 (s), 20.97 (s), 19.48 (s). HRMS (ESI): calculated for C<sub>21</sub>H<sub>23</sub>N [M+H]<sup>+</sup> *m/z* 289.1830, found 289.1828. HPLC analysis: (AD-H, 0.5 % IPA in Hexane, 1 mL/min, 254 nm) indicated ee with L1 91 % & with L2 >99 %.

### (5b) (S)-2,6-dimethyl-N-(1-(naphthalen-2-yl)ethyl)aniline

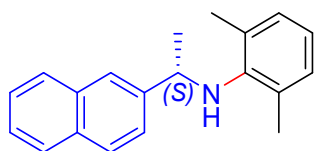

Titled compound prepared according to **General procedure A**. The crude product was purified by column chromatography (2 % EtOAc in hexane) to provide the aminated product as a pale-yellow solid in L1: 53 %, L2: 55% yield. <sup>1</sup>H NMR (400 MHz, CDCl<sub>3</sub>):  $\delta$  8.07 – 7.98 (m, 1H),



7.91 – 7.83 (m, 1H), 7.79 (d,  $J = 8.2$  Hz, 1H), 7.73 (d,  $J = 7.1$  Hz, 1H), 7.55 – 7.40 (m, 3H), 6.98 (d,  $J = 7.4$  Hz, 2H), 6.80 (t,  $J = 7.5$  Hz, 1H), 5.19 (q,  $J = 6.7$  Hz, 1H), 3.53 (s, 1H), 2.24 (s, 6H), 1.61 (d,  $J = 6.6$  Hz, 3H).  $^{13}\text{C}$  NMR (101 MHz,  $\text{CDCl}_3$ ):  $\delta$  145.42 (s), 141.98 (s), 133.67 (s), 130.57 (s), 128.78 (s), 128.65 (s), 128.43 (s), 127.98 (s), 127.21 (s), 125.72 (s), 125.44 (s), 125.26 (s), 122.88 (s), 122.29 (s), 121.02 (s), 52.72 (s), 29.53 (s), 23.87 (s), 18.99 (s). **HRMS (ESI)**: calculated for  $\text{C}_{20}\text{H}_{21}\text{N}$   $[\text{M}+\text{H}]^+$   $m/z$  276.1752, found 276.1742. **HPLC analysis**: (AD-H, 0.5 % IPA in Hexane, 1 mL/min, 254 nm) indicated ee with **L1** 88 % & with **L2** >99 %.

**(5c) (S)-N-(1-(naphthalen-2-yl)ethyl)pyren-1-amine**

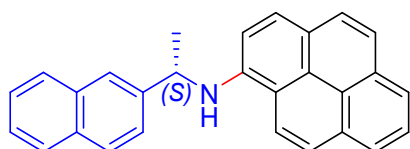

Titled compound prepared according to **General procedure A**. The crude product was purified by column chromatography (2 % EtOAc in hexane) to provide the aminated product as a yellow solid in L1: 60 %, L2: 54% yield.  $^1\text{H}$  NMR (400 MHz,  $\text{CDCl}_3$ ):  $\delta$  8.25 (d,  $J = 5.1$  Hz, 1H), 8.16 (d,  $J = 9.1$  Hz, 1H), 8.11 – 7.98 (m, 2H), 7.95 (d,  $J = 7.8$  Hz, 2H), 7.80 – 7.69 (m, 5H), 7.63 – 7.52 (m, 2H), 7.36 (t,  $J = 7.7$  Hz, 1H), 7.00 (s, 1H), 5.65 (s, 1H), 1.91 (d,  $J = 6.3$  Hz, 3H).  $^{13}\text{C}$  NMR (101 MHz,  $\text{CDCl}_3$ ):  $\delta$  134.31 (s), 130.97 (s), 129.38 (s), 127.89 (s), 126.79 – 125.08 (m), 122.64 (s), 23.87 (s), 14.28 (s). **HRMS (ESI)**: calculated for  $\text{C}_{28}\text{H}_{21}\text{N}$   $[\text{M}+\text{H}]^+$   $m/z$  371.1674, found 371.1669. **HPLC analysis**: (AD-H, 0.5 % IPA in Hexane, 1 mL/min, 254 nm) indicated ee with **L1** 81 % & with **L2** 99 %.

**(5d) (R)-4-((1-phenylethyl)amino)benzotrile**

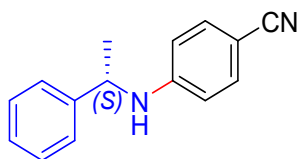

Titled compound prepared according to **General procedure A**. The crude product was purified by column chromatography (20 % EtOAc in hexane) to provide the aminated product as an off-white solid in L1: 49 %, L2: 58% yield. **<sup>1</sup>H NMR (400 MHz, CDCl<sub>3</sub>):**  $\delta$  7.20 (m, 6H), 7.16 – 7.10 (m, 1H), 6.37 (d,  $J$  = 8.7 Hz, 2H), 4.70 (s, 1H), 4.46 – 4.32 (m, 1H), 1.43 (d,  $J$  = 6.8 Hz, 3H). **<sup>13</sup>C NMR (101 MHz, CDCl<sub>3</sub>):**  $\delta$  150.33 (s), 143.63 (s), 133.37 (s), 128.74 (s), 127.18 (s), 125.52 (s), 120.46 (s), 112.78 (s), 98.32 (s), 52.94 (s), 24.52 (s). **HRMS (ESI):** calculated for C<sub>15</sub>H<sub>14</sub>N<sub>2</sub> [M+H]<sup>+</sup>  $m/z$  223.1235, found 223.1225. **HPLC analysis:** (AD-H, 3 % IPA in Hexane, 1 mL/min, 254 nm) indicated ee with **L1** 90 % & with **L2** 95 %.

**(5e) (S)-4-(tert-butyl)-N-(1-phenylethyl)aniline**

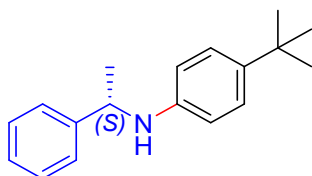

Titled compound prepared according to **General procedure A**. The crude product was purified by column chromatography (2 % EtOAc in hexane) to provide the aminated product as a yellow syrup in L1: 57 %, L2: 53% yield. **<sup>1</sup>H NMR (400 MHz, CDCl<sub>3</sub>):**  $\delta$  7.31 – 7.28 (m, 2H), 7.23 (t,  $J$  = 7.6 Hz, 2H), 7.16 – 7.11 (m, 1H), 7.03 (d,  $J$  = 8.6 Hz, 2H), 6.38 (d,  $J$  = 8.6 Hz, 2H), 4.36 (q,  $J$  = 6.7 Hz, 1H), 3.84 (s, 1H), 1.41 (d,  $J$  = 6.7 Hz, 3H), 1.15 (s, 9H). **<sup>13</sup>C NMR (101 MHz, CDCl<sub>3</sub>):**  $\delta$  145.7, 145.2, 140.0, 128.7, 126.9, 126.0, 113.0, 53.9, 33.9, 31.6, 25.2. **HRMS (ESI):** calculated for C<sub>18</sub>H<sub>23</sub>N [M+H]<sup>+</sup>  $m/z$  254.1908, found 254.1901. **HPLC analysis:** (AD-H, 3 % IPA in Hexane, 1 mL/min, 254 nm) indicated ee with **L1** 85 % & with **L2** 98 %.

**(5f) (R)-N-(1-phenylethyl)pyren-4-amine**

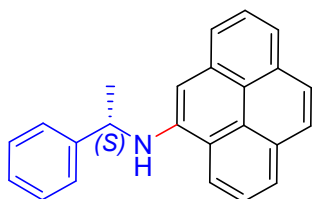

Titled compound prepared according to **General procedure A**. The crude product was purified by column chromatography (5 % EtOAc in hexane) to provide the aminated product as an off-white solid in L1: 42 %, L2: 60% yield. **<sup>1</sup>H NMR (400 MHz, CDCl<sub>3</sub>):**  $\delta$  8.04 – 7.84 (m, 4H), 7.71 (m, 5H), 7.33 (d,  $J$  = 7.5 Hz, 2H), 7.20 (t,  $J$  = 7.4 Hz, 2H), 7.13 (d,  $J$  = 8.9 Hz, 1H), 7.01 (m, 1H), 4.74 (s, 1H), 1.65 (d,  $J$  = 6.4 Hz, 3H). **<sup>13</sup>C NMR (101 MHz, CDCl<sub>3</sub>):**  $\delta$  147.62 (s), 145.37 (s), 136.86 (s), 132.28 (s), 131.91 – 131.16 (m), 128.83 (s), 127.27 (s), 126.08 (s), 124.56 – 123.30 (m), 119.47 (s), 111.05 (s), 54.17 (s), 28.08 (s), 26.46 (d,  $J$  = 20.7 Hz), 25.02 (s). **HRMS (ESI):** calculated for C<sub>24</sub>H<sub>19</sub>N [M+H]<sup>+</sup>  $m/z$  321.1517, found 321.1519. **HPLC analysis:** (AD-H, 100 % Hexane, 1 mL/min, 230 nm) indicated ee with **L1** 95 % & with **L2** >99 %.

**(5g) (S)-2,4,6-trimethyl-N-(1-phenylpropyl)aniline**

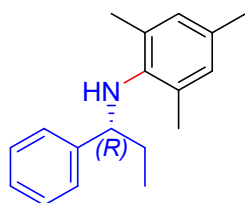

Titled compound prepared according to **General procedure A**. The crude product was purified by column chromatography (2 % EtOAc in hexane) to provide the aminated product as a yellow solid in L1: 52 %, L2: 56% yield. **<sup>1</sup>H NMR (400 MHz, CDCl<sub>3</sub>):**  $\delta$  7.31 – 7.26 (m, 2H), 7.24 – 7.18 (m, 3H), 6.75 (s, 2H), 3.96 (dd,  $J$  = 8.7, 5.6 Hz, 1H), 3.17 (s, 1H), 2.20 (s, 3H), 2.12 (s, 6H), 1.33 – 1.20 (m, 2H), 0.87 (t,  $J$  = 7.4 Hz, 3H). **<sup>13</sup>C NMR (101 MHz, CDCl<sub>3</sub>):**  $\delta$  143.74 (s), 142.12 (s), 132.69 (s), 130.46 (s), 129.17 (s), 128.40 – 127.42 (m), 126.68 (d,  $J$  = 9.7 Hz), 63.52 (s), 31.61 (s), 29.35 (s), 20.35 (s), 18.69 (s), 11.04 (s). **HRMS (ESI):** calculated for C<sub>18</sub>H<sub>23</sub>N [M+H]<sup>+</sup>  $m/z$  253.1830, found 253.1832. **HPLC analysis:** (AD-H, 1.5 % IPA in Hexane, 1 mL/min, 254 nm) indicated ee with **L1** 70 % & with **L2** 75 %.

**(5h) (R)-4-(tert-butyl)-N-(1-phenylpropyl)aniline**

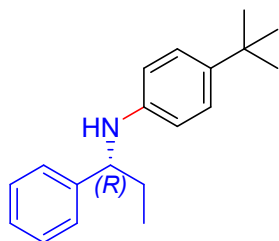

Titled compound prepared according to **General procedure A**. The crude product was purified by column chromatography (2 % EtOAc in hexane) to provide the aminated product as a yellow syrup in L1: 62 %, L2: 69% yield. **<sup>1</sup>H NMR (400 MHz, CDCl<sub>3</sub>):**  $\delta$  7.58 (m, 2H), 7.53 (m, 2H), 7.45 (m, 1H), 7.40 – 7.33 (m, 2H), 6.81 – 6.52 (m, 1H), 4.43 (t,  $J$  = 6.0 Hz, 1H), 4.20 (s, 1H), 2.03 (td,  $J$  = 7.0, 4.2 Hz, 2H), 1.49 (s, 9H), 1.17 (m, 4.8 Hz, 3H). **<sup>13</sup>C NMR (101 MHz, CDCl<sub>3</sub>):**  $\delta$  145.31 (s), 144.35 (s), 139.76 (s), 128.53 (s), 126.89 (s), 126.56 (s), 125.90 (s), 112.97 (s), 60.08 (s), 33.81 (s), 31.82 (s), 31.62 (s), 10.94 (s). **HRMS (ESI):** calculated for C<sub>19</sub>H<sub>25</sub>N [M+H]<sup>+</sup>  $m/z$  268.2065, found 268.2064. **HPLC analysis:** (AD-H, 3 % IPA in Hexane, 1 mL/min, 254 nm) indicated ee with **L1** 64% & with **L2** 86 %.

**(5i) (S)-4-((1-phenylpropyl)amino)benzonitrile**

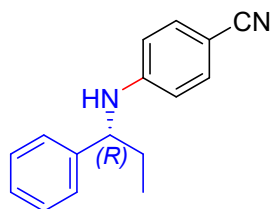

Titled compound prepared according to **General procedure A**. The crude product was purified by column chromatography (20 % EtOAc in hexane) to provide the aminated product as a white solid in L1: 66 %, L2: 68% yield. **<sup>1</sup>H NMR (400 MHz, CDCl<sub>3</sub>):**  $\delta$  7.31 – 7.06 (m, 7H), 6.41 (d,  $J$  = 8.7 Hz, 2H), 4.82 (s, 1H), 4.17 (t,  $J$  = 6.7 Hz, 1H), 1.77 (m, 2H), 0.88 (t,  $J$  = 7.4 Hz, 3H). **<sup>13</sup>C NMR (101 MHz, CDCl<sub>3</sub>):**  $\delta$  150.74 (s), 142.44 (s), 133.46 (s), 128.69 (s), 127.30 (s), 126.30 (s), 120.70 (s), 112.84 (s), 98.15 (s), 59.22 (s), 31.33 (s), 10.79 (s). **HRMS (ESI):** calculated for C<sub>16</sub>H<sub>16</sub>N<sub>2</sub> [M+H]<sup>+</sup>  $m/z$  237.1391, found 237.1382. **HPLC analysis:** (AD-H, 3 % IPA in Hexane, 1 mL/min, 254 nm) indicated ee with **L1** 80 % & with **L2** 92 %.

**(5j) (S)-4-((1-cyclohexylethyl)amino)benzonitrile**

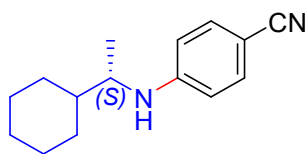

Titled compound prepared according to **General procedure A**. The crude product was purified by column chromatography (20 % EtOAc in hexane) to provide the aminated product as a yellow semi-solid in L1: 73 %, L2: 69 % yield. **<sup>1</sup>H NMR (400 MHz, CDCl<sub>3</sub>):**  $\delta$  7.34 (d,  $J$  = 8.7 Hz, 2H), 6.51 (d,  $J$  = 8.7 Hz, 2H), 4.32 (m, 1H), 3.32 (m, 1H), 1.81 – 1.60 (m, 5H), 1.40 (m, 1H), 1.25 – 1.14 (m, 3H), 1.11 (d,  $J$  = 6.6 Hz, 3H), 0.99 (dd,  $J$  = 19.6, 7.2 Hz, 2H). **<sup>13</sup>C NMR (101 MHz, CDCl<sub>3</sub>):**  $\delta$  151.45 (s), 133.91 (s), 121.14 (s), 112.42 (s), 97.35 (s), 52.89 (s), 43.12 (s), 29.82 (s), 28.76 (s), 26.82 – 26.29 (m), 17.48 (s). **HRMS (ESI):** calculated for C<sub>15</sub>H<sub>20</sub>N [M+H]<sup>+</sup>  $m/z$  229.1704, found 229.1710. **HPLC analysis:** (AD-H, 3 % IPA in Hexane, 1 mL/min, 254 nm) indicated ee with **L1** 61 % & with **L2** 79 %.

**(5k) (S)-4-(tert-butyl)-N-(1-cyclohexylethyl)aniline**

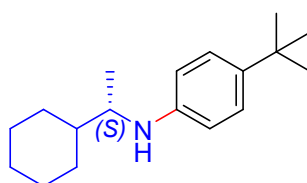

Titled compound prepared according to **General procedure A**. The crude product was purified by column chromatography (2 % EtOAc in hexane) to provide the aminated product as a yellow syrup in L1: 69 %, L2: 62 % yield. **<sup>1</sup>H NMR (400 MHz, CDCl<sub>3</sub>):**  $\delta$  7.13 – 7.04 (m, 2H), 6.43 (dd,  $J$  = 8.4, 1.4 Hz, 2H), 3.32 – 3.07 (m, 2H), 1.67 (ddd,  $J$  = 44.3, 31.2, 13.1 Hz, 5H), 1.33 (dd,  $J$  = 21.0, 9.7 Hz, 1H), 1.19 (s, 9H), 1.16 – 1.05 (m, 3H), 1.01 (dd,  $J$  = 6.5, 1.3 Hz, 3H), 0.96 (m, 2H). **<sup>13</sup>C NMR (101 MHz, CDCl<sub>3</sub>):**  $\delta$  141.32 (s), 138.10 (s), 124.96 (s), 121.72 (s), 111.49 (s), 52.09 (s), 42.00 (s), 32.72 (s), 30.55 (s), 28.76 (s), 27.41 (s), 26.28 – 25.15 (m), 21.41 (s), 16.48 (s). **HRMS (ESI):** calculated for C<sub>18</sub>H<sub>29</sub>N [M+H]<sup>+</sup>  $m/z$  260.2378, found

260.2374. **HPLC analysis:** (AD-H, 0.5 % IPA in Hexane, 1 mL/min, 254 nm) indicated ee with **L1** 99 % & with **L2** 99 %.

**(5I) (S)-N-(1-cyclohexylethyl)pyren-4-amine**

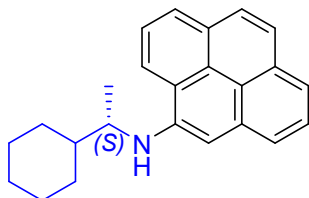

Titled compound prepared according to **General procedure A**. The crude product was purified by column chromatography (2 % EtOAc in hexane) to provide the aminated product as a pale yellowish semi-solid in L1: 58 %, L2: 65% yield. **<sup>1</sup>H NMR (400 MHz, CDCl<sub>3</sub>):**  $\delta$  8.11 – 7.99 (m, 3H), 7.98 – 7.87 (m, 4H), 7.77 (d,  $J$  = 8.8 Hz, 1H), 7.34 (d,  $J$  = 8.4 Hz, 1H), 3.77 (m, 1H), 2.00 (d,  $J$  = 12.5 Hz, 1H), 1.92 – 1.80 (m, 3H), 1.79 – 1.62 (m, 2H), 1.32 (d,  $J$  = 4.7 Hz, 3H), 1.30 (m, 2H) 1.28 – 1.15 (m, 3H). **<sup>13</sup>C NMR (101 MHz, CDCl<sub>3</sub>):**  $\delta$  132.85 (s), 132.56 – 132.34 (m), 131.79 (s), 131.36 (s), 127.62 (s), 126.07 (s), 125.18 (s), 123.59 (s), 123.03 (s), 119.78 (s), 118.94 (s), 42.92 (s), 30.22 (s), 28.60 (s), 26.75 (d,  $J$  = 9.6 Hz), 26.51 (s), 22.72 (s), 17.29 (s), 14.40 (s). **HRMS (ESI):** calculated for C<sub>24</sub>H<sub>25</sub>N [M+H]<sup>+</sup>  $m/z$  328.2065, found 328.2076. **HPLC analysis:** (AD-H, 1.5 % IPA in Hexane, 1 mL/min, 254 nm) indicated ee with **L1** 73 % & with **L2** 87 %.

---

## **S5. Refinement data of single crystal X-ray diffraction**

Single crystals of suitable size, coated with paraffin oil were mounted for all the complexes, substrates and ligand. Crystal data for all the compounds were collected on a Bruker Smart Apex Duo diffractometer at 100K/150 K using Mo K $\alpha$  radiation ( $\lambda = 0.71073 \text{ \AA}$ ) or CuK $\alpha$  ( $\lambda = 1.54178$ ). Collected data were integrated by using SAINT and then absorption correction was done by multi-scan method using SADABS program. All the structures were solved by direct methods and refined by full-matrix least-squares methods against  $F^2$  (SHELXL-2014/7). The data were corrected for disordered electron density through the SQUEEZE procedure, as implemented in PLATON. Crystallographic Information File (CIF) for the structures has been deposited to the Cambridge Crystallographic Data centre as supplementary publication no: CCDC no:

**L2 (2193639); 1 (2193662); 2 (2193663); 3 (2203939); 4f (2193666) 4i (2193667);  
5c (2193664); 5h (2193665).**

**Table S5a: Crystal data and structure refinement for L2 (CCDC:2193639)**

|                                                |                                                                  |
|------------------------------------------------|------------------------------------------------------------------|
| Identification code                            | <b>L2</b>                                                        |
| Empirical formula                              | $C_{33}H_{54}N_3PSi$                                             |
| Formula weight                                 | 551.85                                                           |
| Temperature/K                                  | 150(2)                                                           |
| Crystal system                                 | triclinic                                                        |
| Space group                                    | P-1                                                              |
| a/Å                                            | 10.461(10)                                                       |
| b/Å                                            | 10.611(10)                                                       |
| c/Å                                            | 16.467(16)                                                       |
| $\alpha/^\circ$                                | 83.31(3)                                                         |
| $\beta/^\circ$                                 | 87.04(3)                                                         |
| $\gamma/^\circ$                                | 67.44(2)                                                         |
| Volume/Å <sup>3</sup>                          | 1676(3)                                                          |
| Z                                              | 2                                                                |
| $\rho_{\text{calc}}/\text{g/cm}^3$             | 1.093                                                            |
| $\mu/\text{mm}^{-1}$                           | 0.142                                                            |
| F(000)                                         | 604.0                                                            |
| Crystal size/mm <sup>3</sup>                   | 0.431 × 0.321 × 0.215                                            |
| Radiation                                      | MoK $\alpha$ ( $\lambda = 0.71073$ )                             |
| 2 $\Theta$ range for data collection/ $^\circ$ | 4.18 to 56.806                                                   |
| Index ranges                                   | -13 ≤ h ≤ 13, -14 ≤ k ≤ 14, -22 ≤ l ≤ 22                         |
| Reflections collected                          | 89242                                                            |
| Independent reflections                        | 8352 [ $R_{\text{int}} = 0.1013$ , $R_{\text{sigma}} = 0.0529$ ] |
| Data/restraints/parameters                     | 8352/0/357                                                       |
| Goodness-of-fit on F <sup>2</sup>              | 1.032                                                            |
| Final R indexes [ $I \geq 2\sigma(I)$ ]        | $R_1 = 0.0447$ , $wR_2 = 0.0914$                                 |
| Final R indexes [all data]                     | $R_1 = 0.0694$ , $wR_2 = 0.0998$                                 |
| Largest diff. peak/hole / e Å <sup>-3</sup>    | 0.31/-0.34                                                       |



**Table S5b: Crystal data and structure refinement for 1 (CCDC: 2193662)**

|                                             |                                                                      |
|---------------------------------------------|----------------------------------------------------------------------|
| Identification code                         | 1                                                                    |
| Empirical formula                           | C <sub>39</sub> H <sub>50</sub> Cl <sub>2</sub> N <sub>3</sub> PPdSi |
| Formula weight                              | 797.18                                                               |
| Temperature/K                               | 150(2)                                                               |
| Crystal system                              | monoclinic                                                           |
| Space group                                 | P2 <sub>1</sub> /n                                                   |
| a/Å                                         | 11.721(2)                                                            |
| b/Å                                         | 14.864(3)                                                            |
| c/Å                                         | 21.818(5)                                                            |
| α/°                                         | 90                                                                   |
| β/°                                         | 98.244(6)                                                            |
| γ/°                                         | 90                                                                   |
| Volume/Å <sup>3</sup>                       | 3761.9(13)                                                           |
| Z                                           | 4                                                                    |
| ρ <sub>calc</sub> /cm <sup>3</sup>          | 1.408                                                                |
| μ/mm <sup>-1</sup>                          | 0.742                                                                |
| F(000)                                      | 1656.0                                                               |
| Crystal size/mm <sup>3</sup>                | 0.431 × 0.285 × 0.251                                                |
| Radiation                                   | MoKα (λ = 0.71073)                                                   |
| 2θ range for data collection/°              | 4.218 to 56.718                                                      |
| Index ranges                                | -15 ≤ h ≤ 15, -19 ≤ k ≤ 19, -29 ≤ l ≤ 29                             |
| Reflections collected                       | 160554                                                               |
| Independent reflections                     | 9403 [R <sub>int</sub> = 0.1096, R <sub>sigma</sub> = 0.0425]        |
| Data/restraints/parameters                  | 9403/0/434                                                           |
| Goodness-of-fit on F <sup>2</sup>           | 1.044                                                                |
| Final R indexes [I ≥ 2σ (I)]                | R <sub>1</sub> = 0.0365, wR <sub>2</sub> = 0.0744                    |
| Final R indexes [all data]                  | R <sub>1</sub> = 0.0566, wR <sub>2</sub> = 0.0820                    |
| Largest diff. peak/hole / e Å <sup>-3</sup> | 0.59/-0.76                                                           |

**Table S5c: Crystal data and structure refinement for 2(CCDC: 2193663).**

|                                             |                                                                      |
|---------------------------------------------|----------------------------------------------------------------------|
| Identification code                         | 2                                                                    |
| Empirical formula                           | C <sub>33</sub> H <sub>54</sub> Cl <sub>2</sub> N <sub>3</sub> PPdSi |
| Formula weight                              | 729.15                                                               |
| Temperature/K                               | 100(2)                                                               |
| Crystal system                              | monoclinic                                                           |
| Space group                                 | P2 <sub>1</sub>                                                      |
| a/Å                                         | 11.502(2)                                                            |
| b/Å                                         | 12.782(3)                                                            |
| c/Å                                         | 12.058(2)                                                            |
| α/°                                         | 90.00(3)                                                             |
| β/°                                         | 94.41(3)                                                             |
| γ/°                                         | 90.00(3)                                                             |
| Volume/Å <sup>3</sup>                       | 1767.5(6)                                                            |
| Z                                           | 2                                                                    |
| ρ <sub>calc</sub> /cm <sup>3</sup>          | 1.370                                                                |
| μ/mm <sup>-1</sup>                          | 0.782                                                                |
| F(000)                                      | 764.0                                                                |
| Crystal size/mm <sup>3</sup>                | 0.512 × 0.321 × 0.158                                                |
| Radiation                                   | MoKα (λ = 0.71073)                                                   |
| 2θ range for data collection/°              | 4.652 to 56.838                                                      |
| Index ranges                                | -15 ≤ h ≤ 15, -17 ≤ k ≤ 17, -16 ≤ l ≤ 16                             |
| Reflections collected                       | 63801                                                                |
| Independent reflections                     | 8840 [R <sub>int</sub> = 0.0821, R <sub>sigma</sub> = 0.0519]        |
| Data/restraints/parameters                  | 8840/1/385                                                           |
| Goodness-of-fit on F <sup>2</sup>           | 1.048                                                                |
| Final R indexes [I ≥ 2σ (I)]                | R <sub>1</sub> = 0.0351, wR <sub>2</sub> = 0.0768                    |
| Final R indexes [all data]                  | R <sub>1</sub> = 0.0422, wR <sub>2</sub> = 0.0795                    |
| Largest diff. peak/hole / e Å <sup>-3</sup> | 0.72/-0.82                                                           |
| Flack parameter                             | 0.06(3)                                                              |

**Table S5d: Crystal data and structure refinement for 3(CCDC: 2203939).**

|                                             |                                                                                   |
|---------------------------------------------|-----------------------------------------------------------------------------------|
| Identification code                         | 3                                                                                 |
| Empirical formula                           | C <sub>37</sub> H <sub>48</sub> Cl <sub>4</sub> N <sub>3</sub> PPdSi <sub>2</sub> |
| Formula weight                              | 870.13                                                                            |
| Temperature/K                               | 293(2)                                                                            |
| Crystal system                              | monoclinic                                                                        |
| Space group                                 | C2/c                                                                              |
| a/Å                                         | 25.422(4)                                                                         |
| b/Å                                         | 11.0674(13)                                                                       |
| c/Å                                         | 33.751(4)                                                                         |
| $\alpha$ /°                                 | 90                                                                                |
| $\beta$ /°                                  | 109.835(6)                                                                        |
| $\gamma$ /°                                 | 90                                                                                |
| Volume/Å <sup>3</sup>                       | 8933(2)                                                                           |
| Z                                           | 8                                                                                 |
| $\rho_{\text{calc}}$ /cm <sup>3</sup>       | 1.294                                                                             |
| $\mu$ /mm <sup>-1</sup>                     | 0.772                                                                             |
| F(000)                                      | 3584.0                                                                            |
| Crystal size/mm <sup>3</sup>                | 0.27 × 0.1 × 0.09                                                                 |
| Radiation                                   | MoK $\alpha$ ( $\lambda$ = 0.71073)                                               |
| 2 $\Theta$ range for data collection/°      | 5.106 to 50.202                                                                   |
| Index ranges                                | -30 ≤ h ≤ 30, -13 ≤ k ≤ 13, -40 ≤ l ≤ 40                                          |
| Reflections collected                       | 125014                                                                            |
| Independent reflections                     | 7861 [ $R_{\text{int}}$ = 0.2289, $R_{\text{sigma}}$ = 0.1392]                    |
| Data/restraints/parameters                  | 7861/0/442                                                                        |
| Goodness-of-fit on F <sup>2</sup>           | 1.048                                                                             |
| Final R indexes [ $I \geq 2\sigma(I)$ ]     | $R_1$ = 0.0738, $wR_2$ = 0.1011                                                   |
| Final R indexes [all data]                  | $R_1$ = 0.1432, $wR_2$ = 0.1192                                                   |
| Largest diff. peak/hole / e Å <sup>-3</sup> | 0.57/-0.64                                                                        |

**Table S5e: Crystal data and structure refinement for 4f (CCDC:2193666).**

|                                             |                                                               |
|---------------------------------------------|---------------------------------------------------------------|
| Identification code                         | 4f                                                            |
| Empirical formula                           | C <sub>41</sub> H <sub>37</sub> N                             |
| Formula weight                              | 543.71                                                        |
| Temperature/K                               | 150.15                                                        |
| Crystal system                              | monoclinic                                                    |
| Space group                                 | P2 <sub>1</sub> /n                                            |
| a/Å                                         | 10.939(2)                                                     |
| b/Å                                         | 26.563(6)                                                     |
| c/Å                                         | 11.124(2)                                                     |
| α/°                                         | 90                                                            |
| β/°                                         | 112.526(6)                                                    |
| γ/°                                         | 90                                                            |
| Volume/Å <sup>3</sup>                       | 2985.7(11)                                                    |
| Z                                           | 4                                                             |
| ρ <sub>calc</sub> /cm <sup>3</sup>          | 1.210                                                         |
| μ/mm <sup>-1</sup>                          | 0.069                                                         |
| F(000)                                      | 1160.0                                                        |
| Crystal size/mm <sup>3</sup>                | 0.315 × 0.278 × 0.169                                         |
| Radiation                                   | MoKα (λ = 0.71073)                                            |
| 2θ range for data collection/°              | 4.25 to 56.82                                                 |
| Index ranges                                | -14 ≤ h ≤ 14, -35 ≤ k ≤ 35, -14 ≤ l ≤ 14                      |
| Reflections collected                       | 105287                                                        |
| Independent reflections                     | 7440 [R <sub>int</sub> = 0.1577, R <sub>sigma</sub> = 0.0732] |
| Data/restraints/parameters                  | 7440/0/382                                                    |
| Goodness-of-fit on F <sup>2</sup>           | 1.024                                                         |
| Final R indexes [I ≥ 2σ (I)]                | R <sub>1</sub> = 0.0548, wR <sub>2</sub> = 0.1123             |
| Final R indexes [all data]                  | R <sub>1</sub> = 0.1117, wR <sub>2</sub> = 0.1368             |
| Largest diff. peak/hole / e Å <sup>-3</sup> | 0.67/-0.32                                                    |

**Table S5f: Crystal data and structure refinement for 4i (CCDC:2193667)**

|                                             |                                                               |
|---------------------------------------------|---------------------------------------------------------------|
| Identification code                         | 4i                                                            |
| Empirical formula                           | C <sub>46</sub> H <sub>47</sub> N                             |
| Formula weight                              | 613.84                                                        |
| Temperature/K                               | 150(2)                                                        |
| Crystal system                              | monoclinic                                                    |
| Space group                                 | P2 <sub>1</sub> /n                                            |
| a/Å                                         | 12.506(4)                                                     |
| b/Å                                         | 23.229(8)                                                     |
| c/Å                                         | 13.297(4)                                                     |
| α/°                                         | 90                                                            |
| β/°                                         | 114.039(11)                                                   |
| γ/°                                         | 90                                                            |
| Volume/Å <sup>3</sup>                       | 3528(2)                                                       |
| Z                                           | 4                                                             |
| ρ <sub>calc</sub> /cm <sup>3</sup>          | 1.156                                                         |
| μ/mm <sup>-1</sup>                          | 0.066                                                         |
| F(000)                                      | 1320.0                                                        |
| Crystal size/mm <sup>3</sup>                | 0.268 × 0.265 × 0.144                                         |
| Radiation                                   | MoKα (λ = 0.71073)                                            |
| 2θ range for data collection/°              | 3.784 to 56.768                                               |
| Index ranges                                | -16 ≤ h ≤ 16, -31 ≤ k ≤ 30, -17 ≤ l ≤ 13                      |
| Reflections collected                       | 51581                                                         |
| Independent reflections                     | 8793 [R <sub>int</sub> = 0.1240, R <sub>sigma</sub> = 0.1053] |
| Data/restraints/parameters                  | 8793/0/432                                                    |
| Goodness-of-fit on F <sup>2</sup>           | 1.007                                                         |
| Final R indexes [I ≥ 2σ (I)]                | R <sub>1</sub> = 0.0644, wR <sub>2</sub> = 0.1364             |
| Final R indexes [all data]                  | R <sub>1</sub> = 0.1468, wR <sub>2</sub> = 0.1720             |
| Largest diff. peak/hole / e Å <sup>-3</sup> | 0.23/-0.26                                                    |

## 5c

**Table S5g: Crystal data and structure refinement for 5c(CCDC:2193664).**

|                                             |                                                               |
|---------------------------------------------|---------------------------------------------------------------|
| Identification code                         | 5c                                                            |
| Empirical formula                           | C <sub>28</sub> H <sub>21</sub> N                             |
| Formula weight                              | 371.46                                                        |
| Temperature/K                               | 150.15                                                        |
| Crystal system                              | orthorhombic                                                  |
| Space group                                 | P2 <sub>1</sub> 2 <sub>1</sub> 2 <sub>1</sub>                 |
| a/Å                                         | 8.6857(15)                                                    |
| b/Å                                         | 12.012(2)                                                     |
| c/Å                                         | 37.160(6)                                                     |
| α/°                                         | 90                                                            |
| β/°                                         | 90                                                            |
| γ/°                                         | 90                                                            |
| Volume/Å <sup>3</sup>                       | 3877.1(11)                                                    |
| Z                                           | 8                                                             |
| ρ <sub>calc</sub> /cm <sup>3</sup>          | 1.273                                                         |
| μ/mm <sup>-1</sup>                          | 0.558                                                         |
| F(000)                                      | 1568.0                                                        |
| Crystal size/mm <sup>3</sup>                | 0.341 × 0.268 × 0.186                                         |
| Radiation                                   | CuKα (λ = 1.54178)                                            |
| 2θ range for data collection/°              | 4.756 to 155.666                                              |
| Index ranges                                | -10 ≤ h ≤ 10, -14 ≤ k ≤ 15, -46 ≤ l ≤ 45                      |
| Reflections collected                       | 64151                                                         |
| Independent reflections                     | 7843 [R <sub>int</sub> = 0.1220, R <sub>sigma</sub> = 0.0588] |
| Data/restraints/parameters                  | 7843/0/526                                                    |
| Goodness-of-fit on F <sup>2</sup>           | 1.151                                                         |
| Final R indexes [I ≥ 2σ (I)]                | R <sub>1</sub> = 0.0737, wR <sub>2</sub> = 0.1242             |
| Final R indexes [all data]                  | R <sub>1</sub> = 0.0955, wR <sub>2</sub> = 0.1351             |
| Largest diff. peak/hole / e Å <sup>-3</sup> | 0.24/-0.25                                                    |
| Flack parameter                             | -0.6(4)                                                       |

## 5h

**Table S5h: Crystal data and structure refinement for 5h(CCDC:2193665).**

|                                             |                                                               |
|---------------------------------------------|---------------------------------------------------------------|
| Identification code                         | 5h                                                            |
| Empirical formula                           | C <sub>19</sub> H <sub>25</sub> N                             |
| Formula weight                              | 267.40                                                        |
| Temperature/K                               | 150.15                                                        |
| Crystal system                              | monoclinic                                                    |
| Space group                                 | C2                                                            |
| a/Å                                         | 23.428(3)                                                     |
| b/Å                                         | 5.9565(8)                                                     |
| c/Å                                         | 23.648(3)                                                     |
| α/°                                         | 90                                                            |
| β/°                                         | 101.376(6)                                                    |
| γ/°                                         | 90                                                            |
| Volume/Å <sup>3</sup>                       | 3235.2(7)                                                     |
| Z                                           | 8                                                             |
| ρ <sub>calc</sub> /cm <sup>3</sup>          | 1.098                                                         |
| μ/mm <sup>-1</sup>                          | 0.469                                                         |
| F(000)                                      | 1168.0                                                        |
| Crystal size/mm <sup>3</sup>                | 0.315 × 0.219 × 0.169                                         |
| Radiation                                   | CuKα (λ = 1.54178)                                            |
| 2θ range for data collection/°              | 3.812 to 151.31                                               |
| Index ranges                                | -28 ≤ h ≤ 27, -7 ≤ k ≤ 7, -29 ≤ l ≤ 29                        |
| Reflections collected                       | 61573                                                         |
| Independent reflections                     | 6625 [R <sub>int</sub> = 0.0854, R <sub>sigma</sub> = 0.0379] |
| Data/restraints/parameters                  | 6625/1/427                                                    |
| Goodness-of-fit on F <sup>2</sup>           | 1.039                                                         |
| Final R indexes [I ≥ 2σ (I)]                | R <sub>1</sub> = 0.0395, wR <sub>2</sub> = 0.0830             |
| Final R indexes [all data]                  | R <sub>1</sub> = 0.0499, wR <sub>2</sub> = 0.0891             |
| Largest diff. peak/hole / e Å <sup>-3</sup> | 0.15/-0.14                                                    |
| Flack parameter                             | -0.1(3)                                                       |

## S6. Kinetic Experiments

### I) Procedure for Standard Kinetic Experiments

In the standard rate measurements, a Schlenk tube was charged with ligand and metal precursor (**L2**/Pd(dba)<sub>2</sub>) (5 mg, 2 mol%), NaO<sup>t</sup>Bu (0.038 g, 0.4 mmol), aryl halide **2a** (22 μL, 0.2 mmol), Ar-NH<sub>2</sub> **1a** (0.088 g, 0.2 mmol), and 1.5 mL toluene was added as a reaction solvent. The Schlenk tube containing the reaction mixture was heated at 100 °C in a preheated oil bath, at regular interval of time (10, 20, 30, 60, 90, 120, 150 mins etc.) and after completion, the reaction solvent was completely evaporated in a vacuum. The total reaction mixture was dissolved in 0.6 mL of CDCl<sub>3</sub> and internal standard 1,4-dioxane (8 μL, 0.1 mmol) was added to the reaction tube. Then this reaction mixture was passed through a PTFE filter (25 mm, 0.22 μM), and reaction progress was monitored by <sup>1</sup>H NMR spectroscopy at regular intervals of time. (See Table S9 in the supporting information). The data of the concentration of product [M] vs time (min) plot was drawn with “Origin pro-8.5” (Figure S2). The rate was determined by initial rate method. The slope of the linear fitting represents the reaction rate.

**Table S8:** Concentrations of product **3a** at different time intervals

| Sr No | Time (min) | Yield % | Concentration of <b>3a</b> |         |
|-------|------------|---------|----------------------------|---------|
|       |            |         | [M]                        | [M]     |
| 1     | 10         | 7       | 0.014                      | 0.133 M |
| 2     | 20         | 9       | 0.018                      | 0.133 M |
| 3     | 30         | 12      | 0.024                      | 0.133 M |
| 4     | 60         | 15      | 0.030                      | 0.133 M |
| 5     | 90         | 16      | 0.032                      | 0.133 M |
| 6     | 120        | 18      | 0.036                      | 0.133 M |
| 7     | 150        | 21      | 0.042                      | 0.133 M |
| 8     | 180        | 26      | 0.052                      | 0.133 M |
| 9     | 210        | 28      | 0.056                      | 0.133 M |
| 10    | 240        | 34      | 0.068                      | 0.133 M |



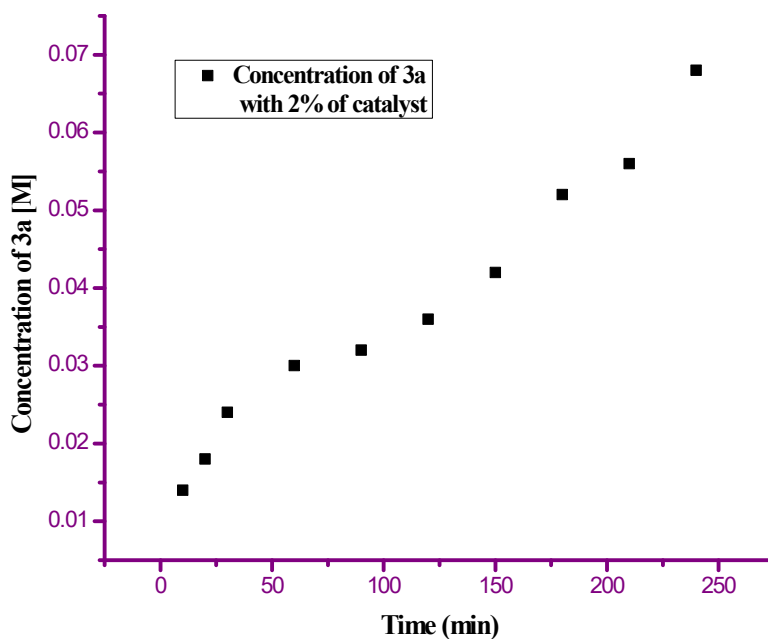

**Figure S2:** Time dependent formation of **3a**, employing 0.0026 M catalyst loading (2 mol%)

## II) Procedure for Rate Order Determination

The rate order of the amination reaction with various components was determined by the initial rate method. The data of the concentration of the product vs time (min) plot was fitted linear with Origin Pro 8.5. The slope of the linear fitting represents the reaction rate. The order of the reaction was then determined by plotting  $\log_{10}(\text{rate})$  vs  $\log_{10}(\text{conc.})$  for a particular component.

### a) Representative procedure: rate determination with respect to amine

To determine the order of the amination reaction on  $\text{Ar}^*\text{-NH}_2$ , initial rate at different initial concentration of amine were determined. The final data was obtained by averaging the results of two independent experiments for same initial concentration. In standard experiment, a Schlenk tube was charged with ligand and metal precursor (**L2**/ $\text{Pd}(\text{dba})_2$ ) (5 mg, 2 mol%),  $\text{NaO}^t\text{Bu}$  (0.038 g, 0.4 mmol), aryl halide **2a** (22  $\mu\text{L}$ , 0.2 mmol),  $\text{Ar-NH}_2$  **1a** (0.088 g, 0.2 mmol), and 1.5 mL toluene was added as a reaction solvent. The Schlenk tube containing the reaction mixture was heated at 100 °C in a preheated oil bath, at regular interval of time (10, 20, 30, 60,

90, and 120 mins) and after completion, the reaction solvent was completely evaporated in a vacuum. The total reaction mixture was dissolved in 0.6 mL of  $\text{CDCl}_3$  and internal standard 1,4-dioxane (8  $\mu\text{L}$ , 0.1 mmol) was added to the reaction tube. Then this reaction mixture was passed through a PTFE filter (25 mm, 0.22  $\mu\text{m}$ ), The concentration of **3a** obtained in each sample is determined with respect to internal standard “ 1,4-dioxane ”.

**Table S9:** Rate of amination reaction at different initial concentration of amine (**1a**)

| Experiment | Amount of <b>1a</b><br>(g) | Initial Conc. of <b>1a</b><br>[M] | Initial Rate [ $\text{Mmin}^{-1}$ ] x<br>$10^{-4}$ | $R^2$  |
|------------|----------------------------|-----------------------------------|----------------------------------------------------|--------|
| 1          | 0.044                      | 0.066                             | $0.635 \pm 0.048$                                  | 0.9712 |
| 2          | 0.088                      | 0.133                             | $1.460 \pm 0.127$                                  | 0.9630 |
| 3          | 0.132                      | 0.2                               | $2.007 \pm 0.107$                                  | 0.9859 |
| 4          | 0.176                      | 0.266                             | $2.280 \pm 0.098$                                  | 0.9907 |

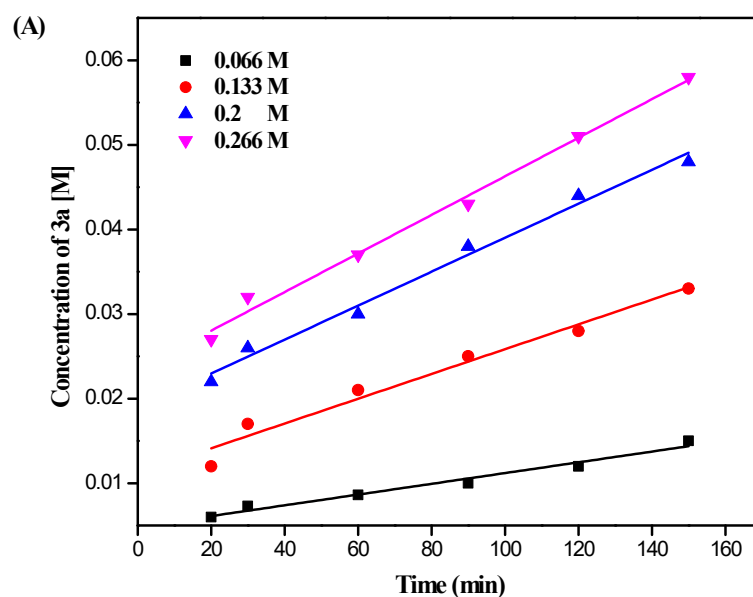

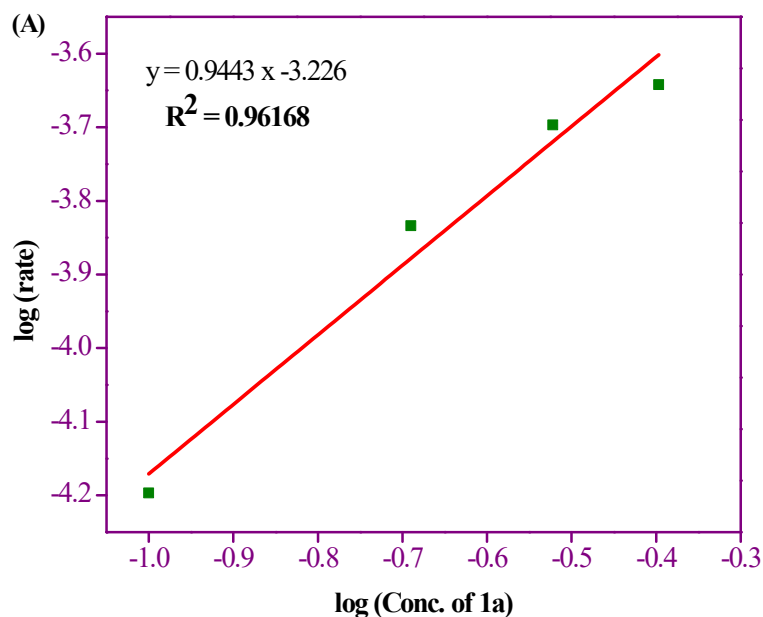

**Figure S3:** (A) Time-dependent formation of **3a** at different initial concentrations of **1a** (A')  
Plot of  $\log_{10}(\text{Conc. of } \mathbf{1a})$  vs.  $\log_{10}(\text{rate})$ .

**b) Representative procedure: rate determination with respect to catalyst**

To determine the order of the amination reaction on catalyst loading initial rate at different initial concentration of amine were determined. The final data was obtained by averaging the results of two independent experiments for same initial concentration. In standard experiment, a Schlenk tube was charged with ligand and metal precursor (**L2**/ $\text{Pd}(\text{dba})_2$ ) (5 mg, 2 mol%),  $\text{NaO}^t\text{Bu}$  (0.038 g, 0.4 mmol), aryl halide **2a** (22  $\mu\text{L}$ , 0.2 mmol),  $\text{Ar-NH}_2$  **1a** (0.088 g, 0.2 mmol), and 1.5 mL toluene was added as a reaction solvent. The Schlenk tube containing the reaction mixture was heated at 100  $^\circ\text{C}$  in a preheated oil bath, at regular interval of time (10, 20, 30, 60, and 90 mins) and after completion, the reaction solvent was completely evaporated in a vacuum. The total reaction mixture was dissolved in 0.6 mL of  $\text{CDCl}_3$  and internal standard 1,4-dioxane (8  $\mu\text{L}$ , 0.1 mmol) was added to the reaction tube. Then this reaction mixture was passed through a PTFE filter (25 mm, 0.22  $\mu\text{m}$ ), The concentration of **3a** obtained in each sample is determined with respect to internal standard “1, 4-dioxane”.

**Table S10:** Rate of amination reaction at different initial concentrations of catalyst

| Experiment | Amount of catalyst (g) | Initial Conc. of catalyst [M] | Initial Rate [Mmin <sup>-1</sup> ] x 10 <sup>-4</sup> | R <sup>2</sup> |
|------------|------------------------|-------------------------------|-------------------------------------------------------|----------------|
| 1          | 0.003                  | 0.0013                        | 1.020 ± 0.0845                                        | 0.9731         |
| 2          | 0.006                  | 0.0026                        | 2.451 ± 0.0738                                        | 0.9964         |
| 3          | 0.009                  | 0.004                         | 3.393 ± 0.383                                         | 0.9508         |
| 4          | 0.012                  | 0.0053                        | 9.208 ± 0.877                                         | 0.9646         |

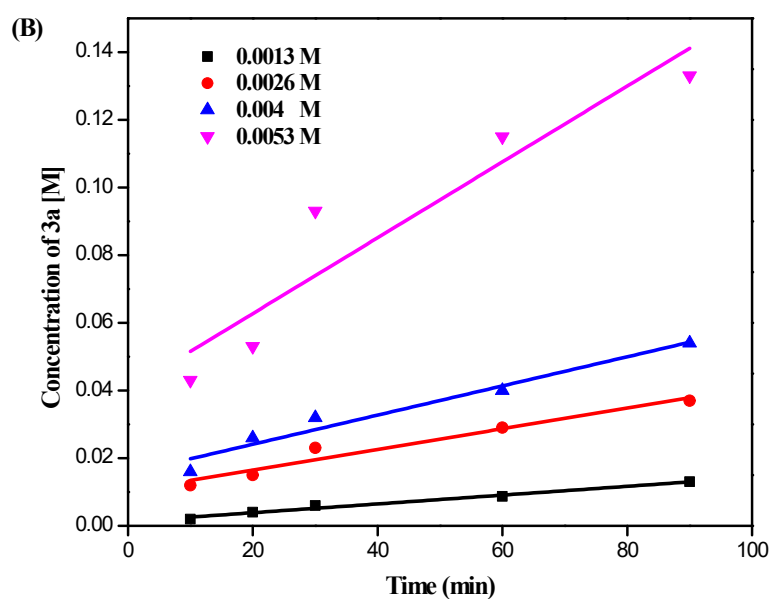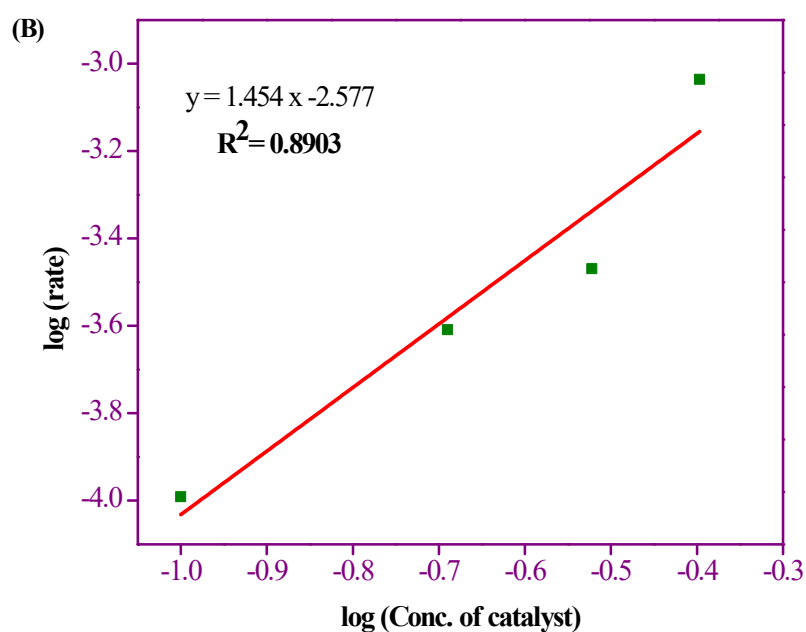

**Figure S4:** (B) Time-dependent formation of **3a** at different initial concentrations of catalyst (B') Plot of  $\log_{10}(\text{Conc. of catalyst})$  vs.  $\log_{10}(\text{rate})$ .

**a) Representative procedure: rate determination with respect to aryl bromide**

To determine the order of the amination reaction on aryl bromide, initial rate at different initial concentration of amine were determined. The final data was obtained by averaging the results of two independent experiments for same initial concentration. In standard experiment, a Schlenk tube was charged with ligand and metal precursor (**L2**/Pd(dba)<sub>2</sub>) (5 mg, 2 mol%), NaO<sup>t</sup>Bu (0.038 g, 0.4 mmol), aryl halide **2a** (22  $\mu$ L, 0.2 mmol), Ar-NH<sub>2</sub> **1a** (0.088 g, 0.2 mmol), and 1.5 mL toluene was added as a reaction solvent. The Schlenk tube containing the reaction mixture was heated at 100 °C in a preheated oil bath, at regular interval of time (10, 20, 30, 60, and 90 mins) and after completion, the reaction solvent was completely evaporated in a vacuum. The total reaction mixture was dissolved in 0.6 mL of CDCl<sub>3</sub> and internal standard 1,4-dioxane (8  $\mu$ L, 0.1 mmol) was added to the reaction tube. Then this reaction mixture was passed through a PTFE filter (25 mm, 0.22  $\mu$ m), The concentration of **2a** obtained in each sample is determined with respect to internal standard “1,4-dioxane”.

**Table S11:** Rate of Amination reaction at different initial concentrations of aryl bromide (**2a**)

| Experiment | Amount of <b>2a</b><br>(g) | Initial Conc. of <b>2a</b><br>[M] | Initial Rate [Mmin <sup>-1</sup> ] x<br>10 <sup>-4</sup> | R <sup>2</sup> |
|------------|----------------------------|-----------------------------------|----------------------------------------------------------|----------------|
| 1          | 0.0126                     | 0.066                             | 1.156 ± 0.118                                            | 0.9592         |
| 2          | 0.0253                     | 0.133                             | 1.799 ± 0.164                                            | 0.9674         |
| 3          | 0.0380                     | 0.2                               | 2.289 ± 0.243                                            | 0.9562         |
| 4          | 0.0506                     | 0.266                             | 2.355 ± 0.104                                            | 0.9921         |

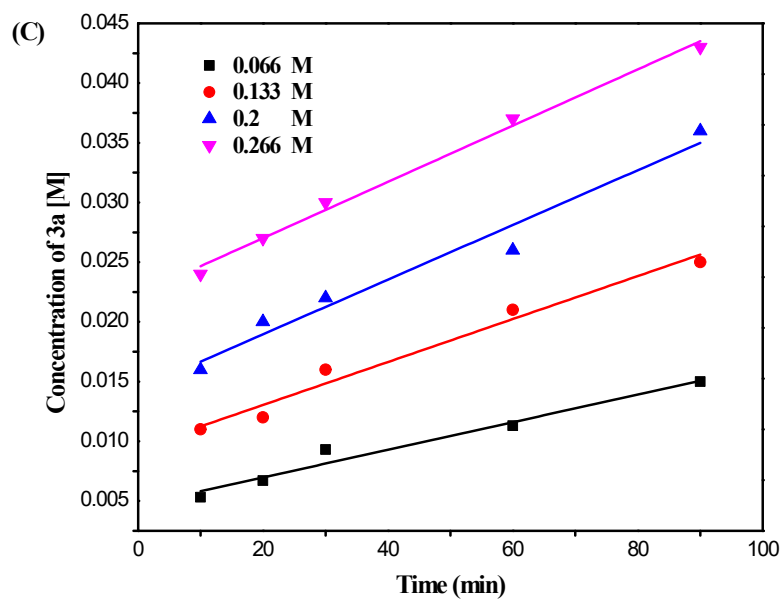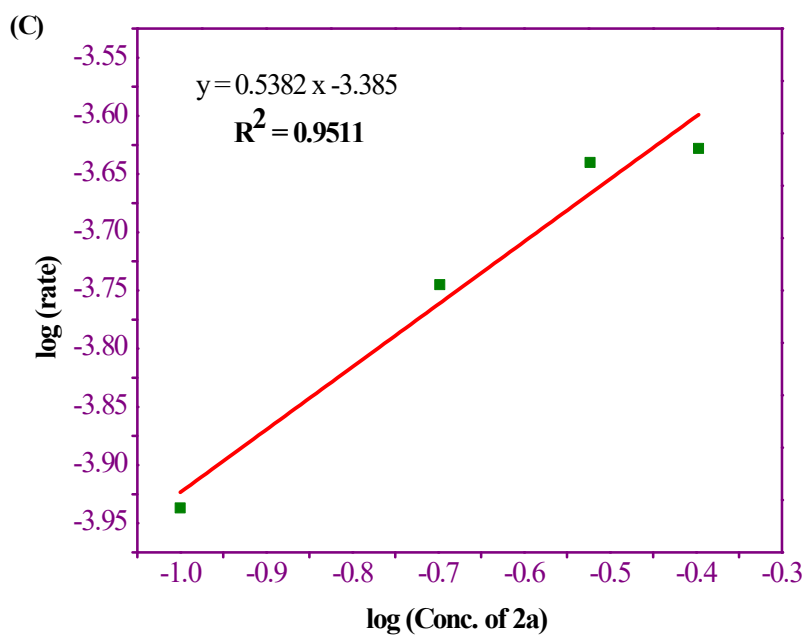

**Figure S5:** (C) Time-dependent formation of **3a** at different initial concentrations of **2a** (C')

Plot of  $\log_{10}(\text{Conc. of } \mathbf{2a})$  vs.  $\log_{10}(\text{rate})$ .

# S7. NMR Spectra

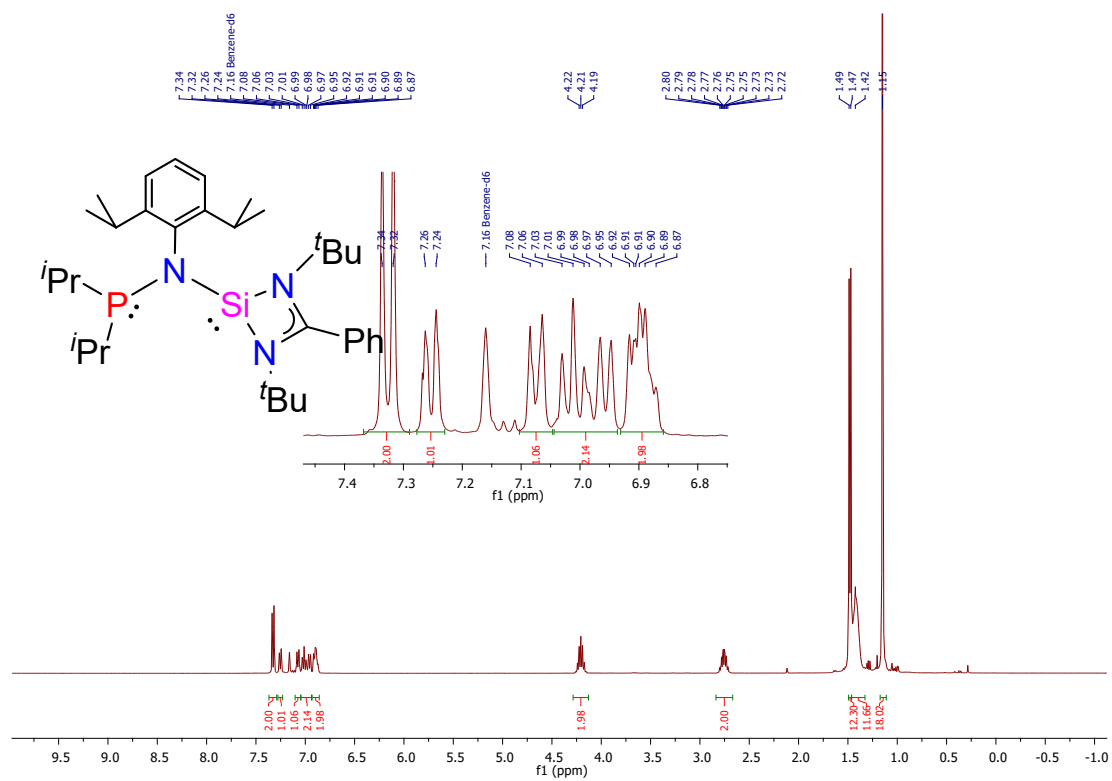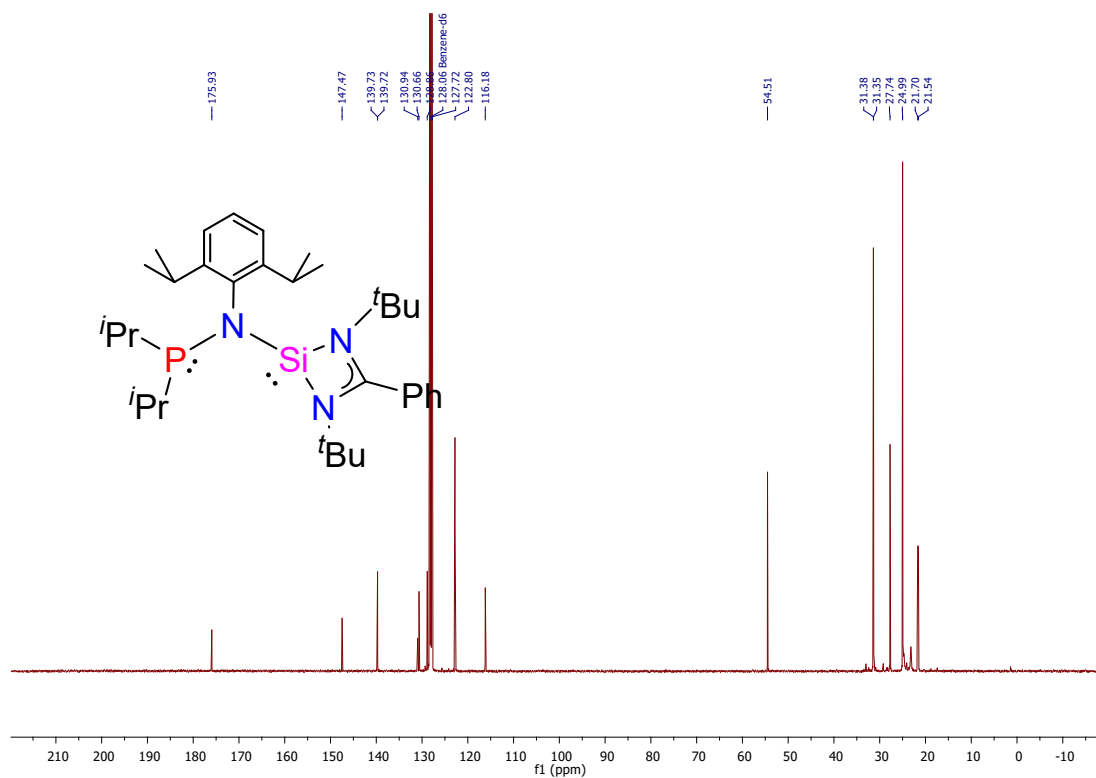

### $^{13}\text{C}\{^1\text{H}\}$ NMR of L2

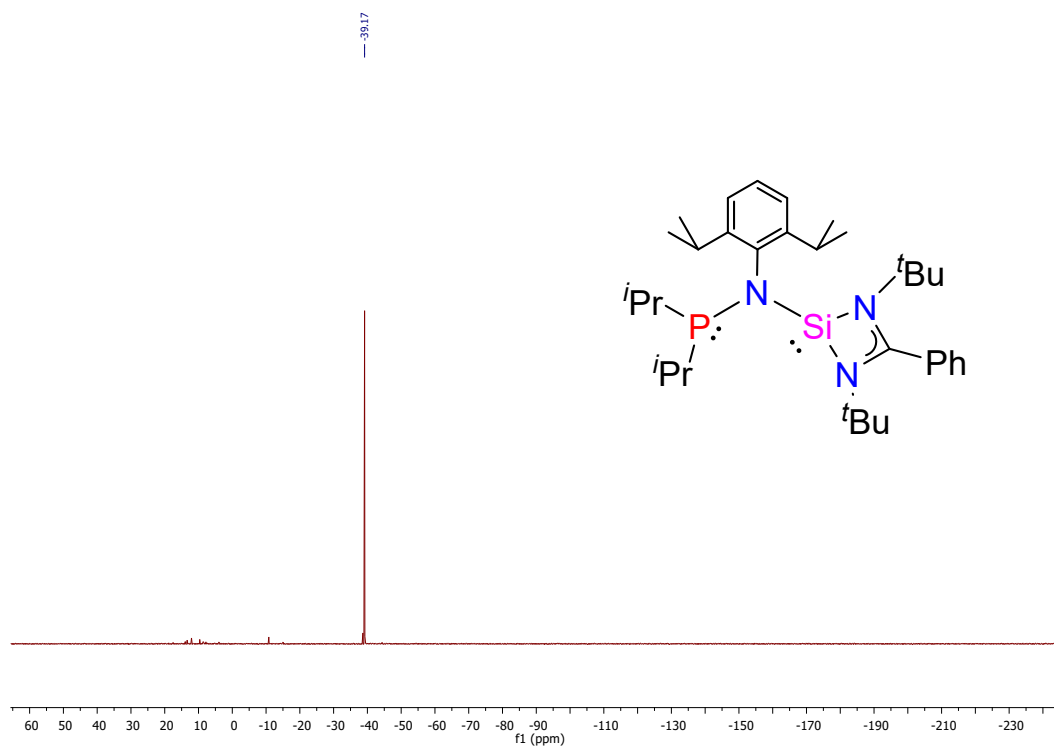

### $^{31}\text{P}\{^1\text{H}\}$ NMR of L2

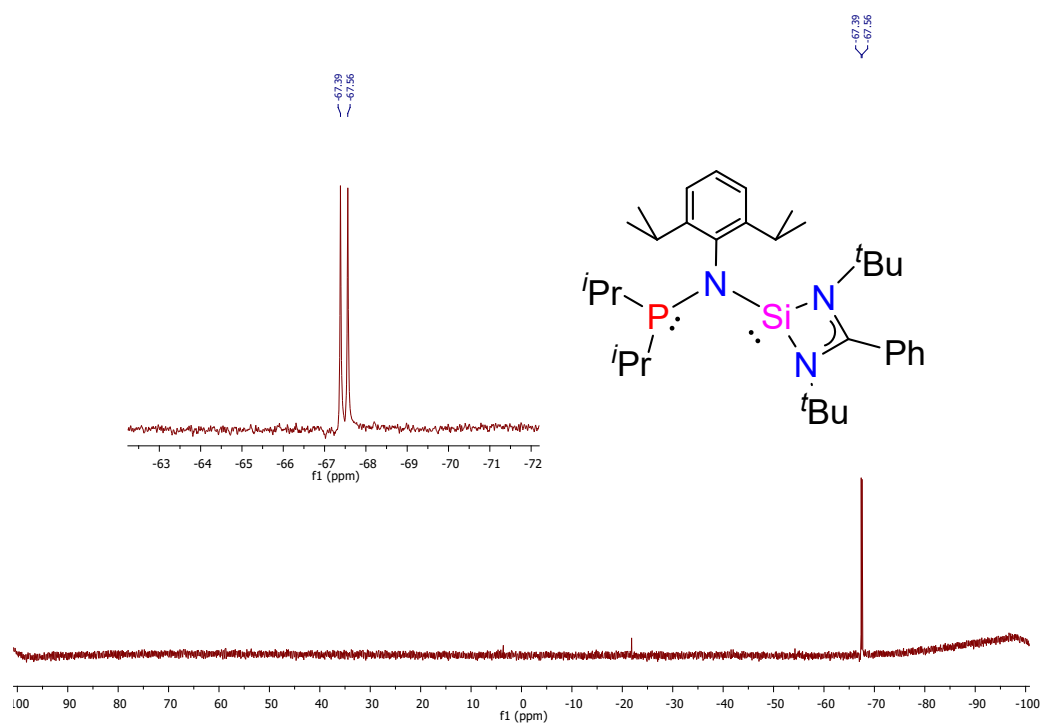

### $^{29}\text{Si}\{^1\text{H}\}$ NMR of L2



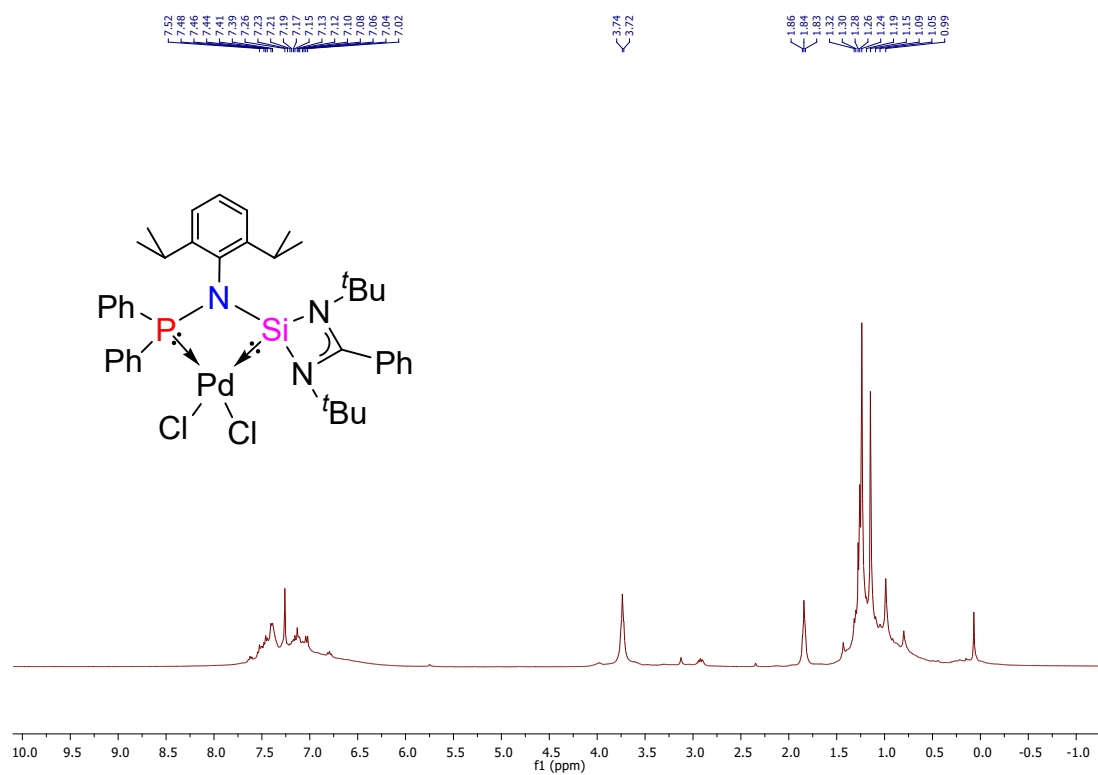

$^1\text{H NMR}$  of 1

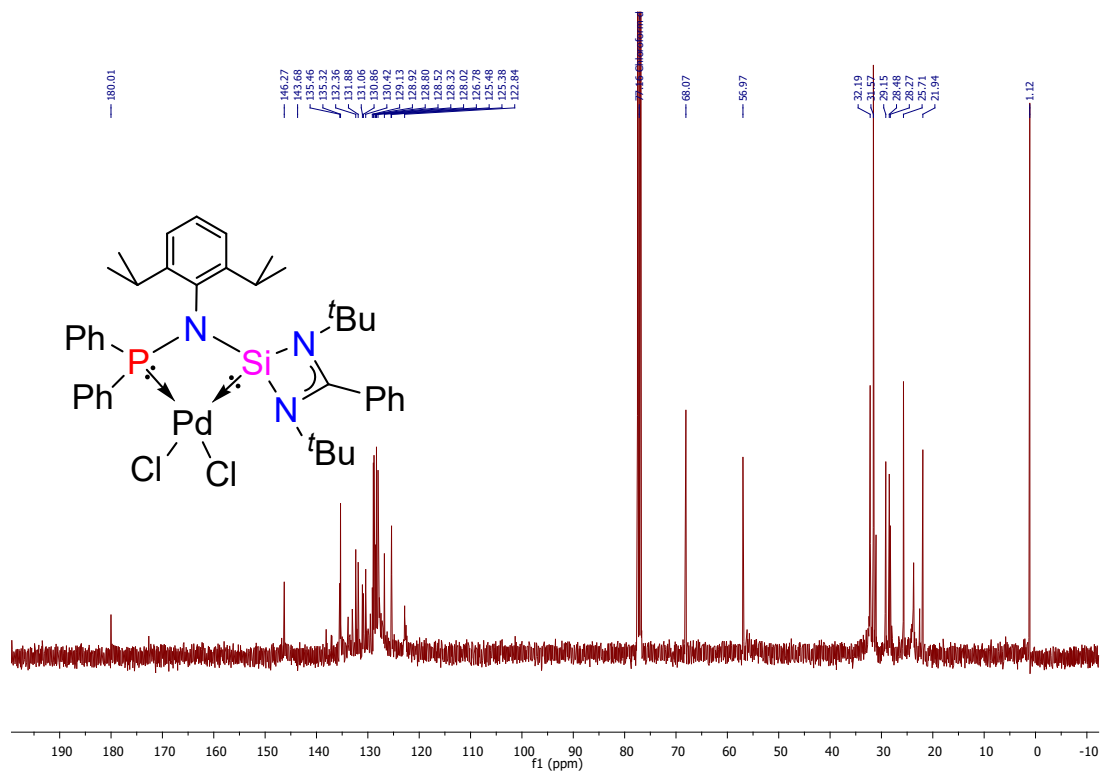

$^{13}\text{C}\{^1\text{H}\}$  NMR of 1

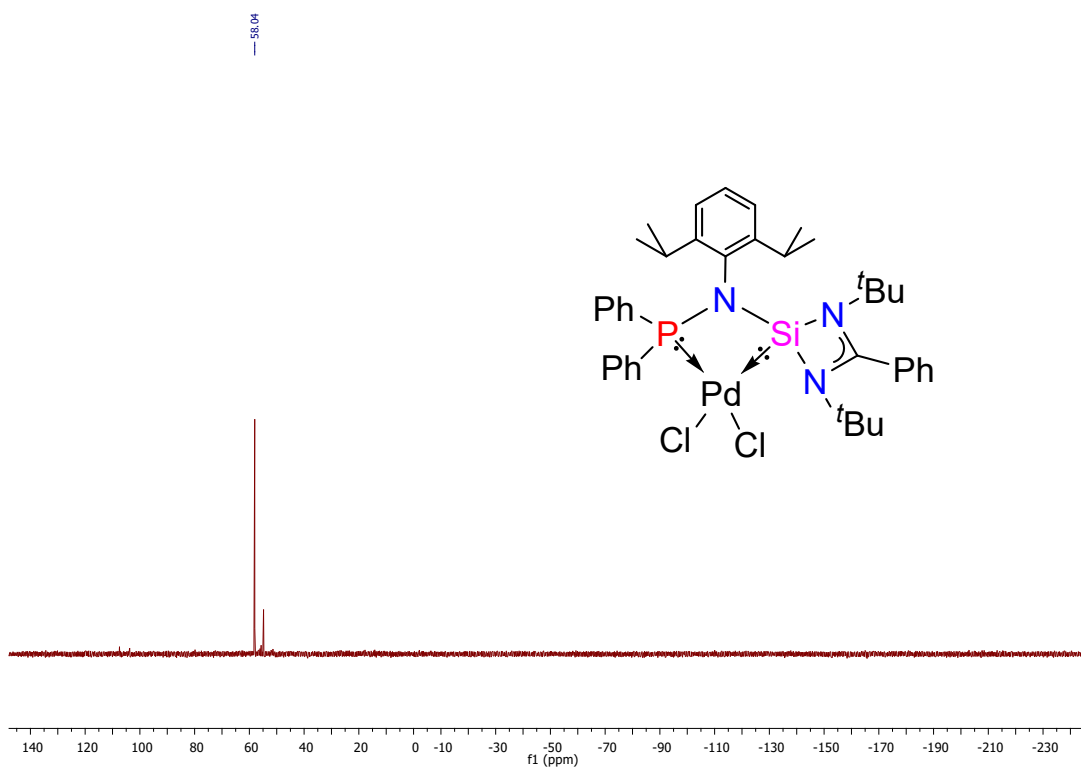

$^{31}\text{P}\{^1\text{H}\}$  NMR of **1**

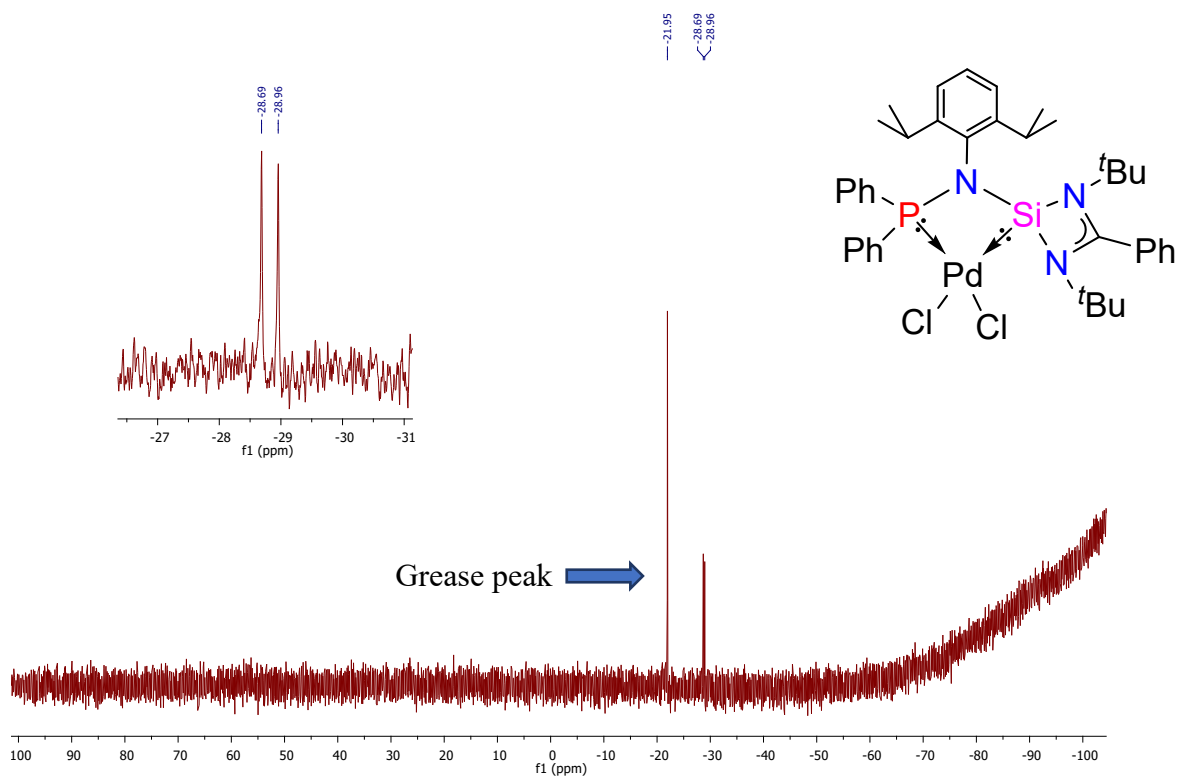

$^{29}\text{Si}\{^1\text{H}\}$  NMR of **1**

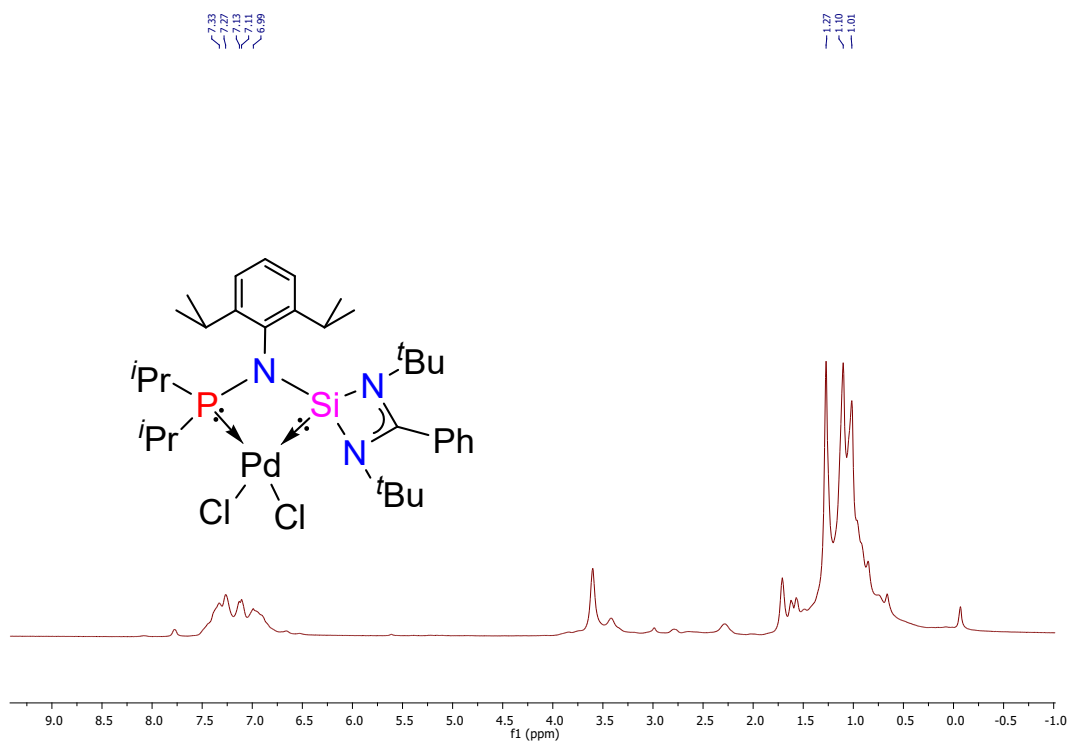

$^1\text{H}$  NMR of **2**

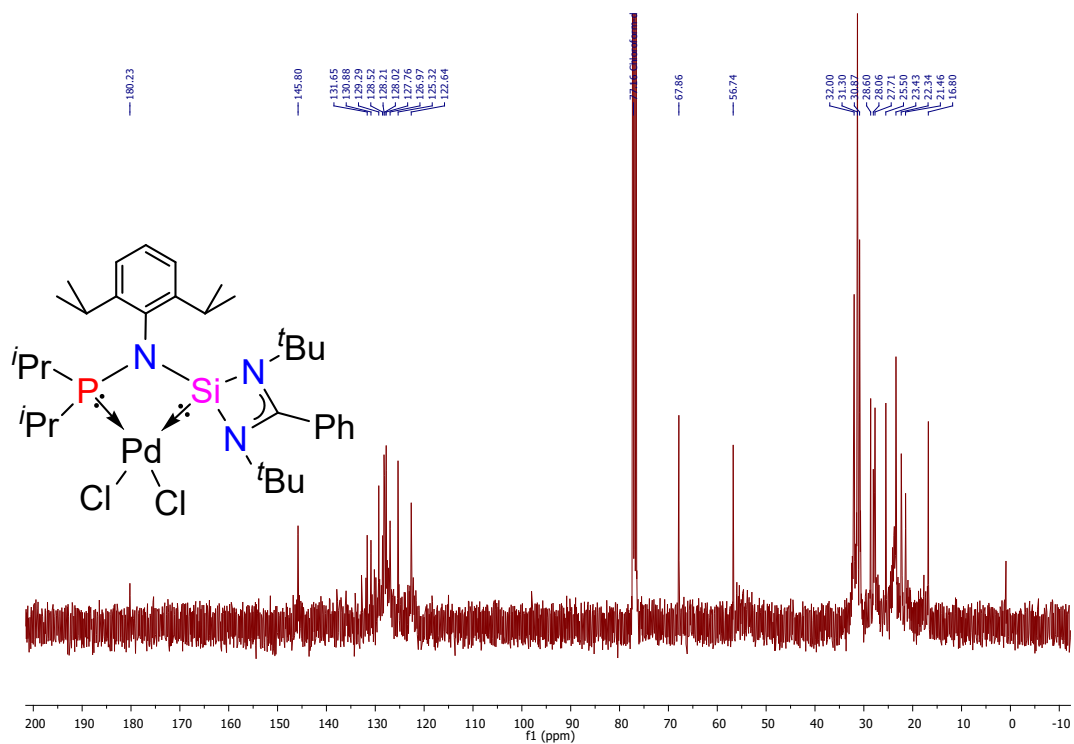

$^{13}\text{C}\{^1\text{H}\}$  NMR of **2**

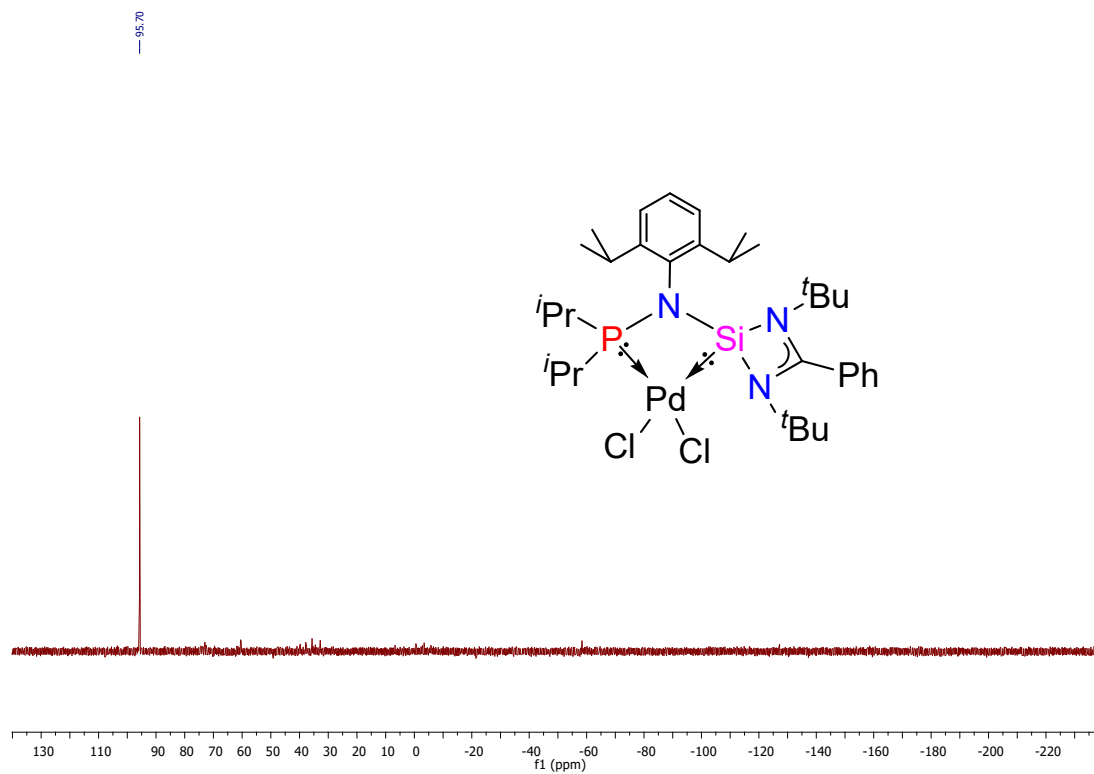

$^{31}\text{P}\{^1\text{H}\}$  NMR of 2

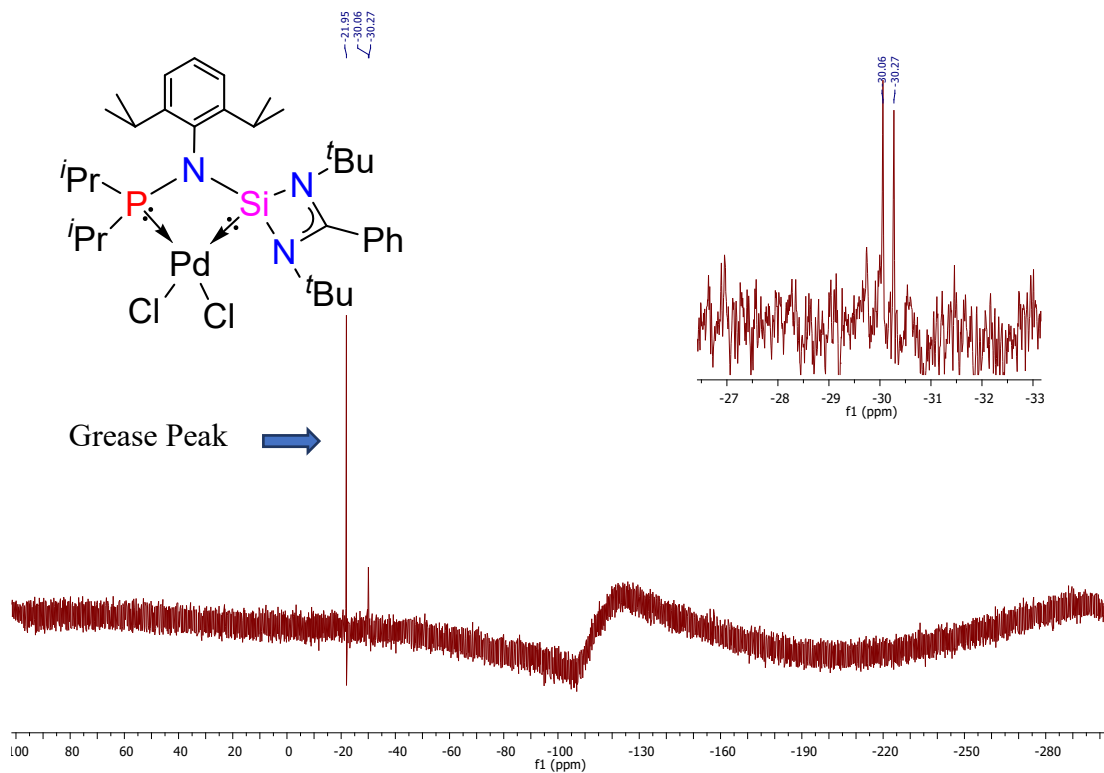

$^{29}\text{Si}\{^1\text{H}\}$  NMR of 2

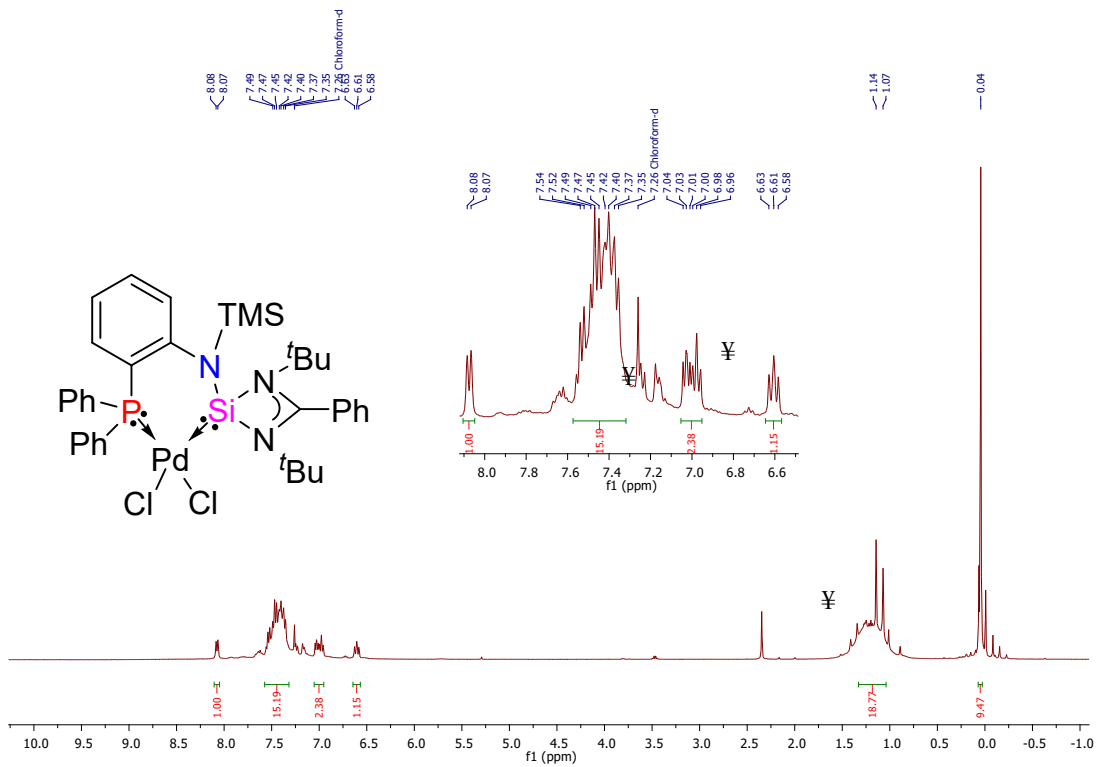

**<sup>1</sup>H NMR of 3 (☞ = Toluene)**

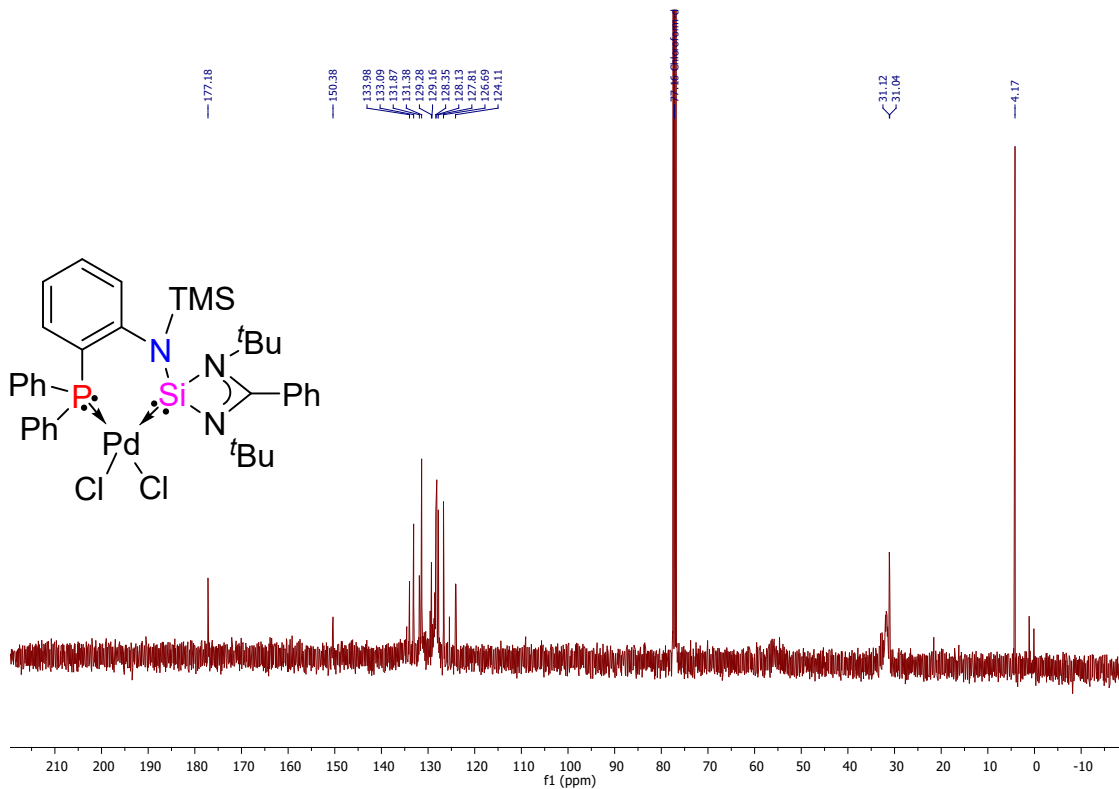

**<sup>13</sup>C{<sup>1</sup>H} NMR of 3**

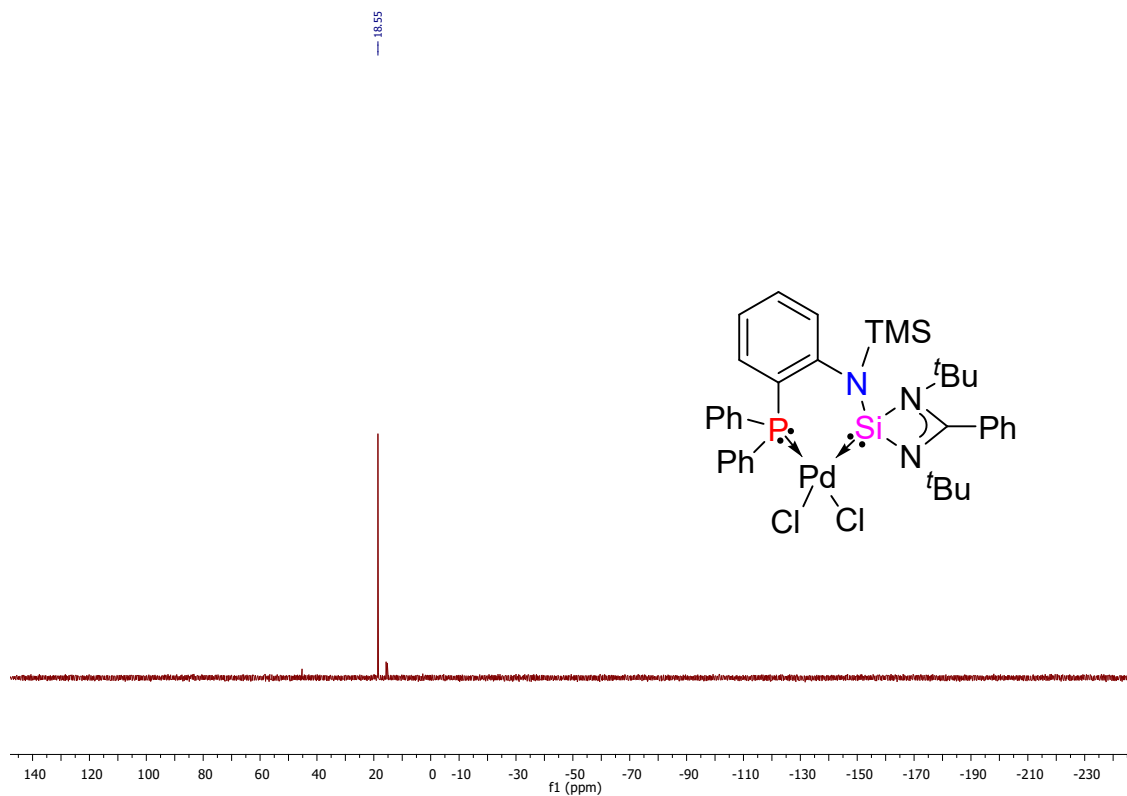

**$^{31}\text{P}\{^1\text{H}\}$  NMR of 3**

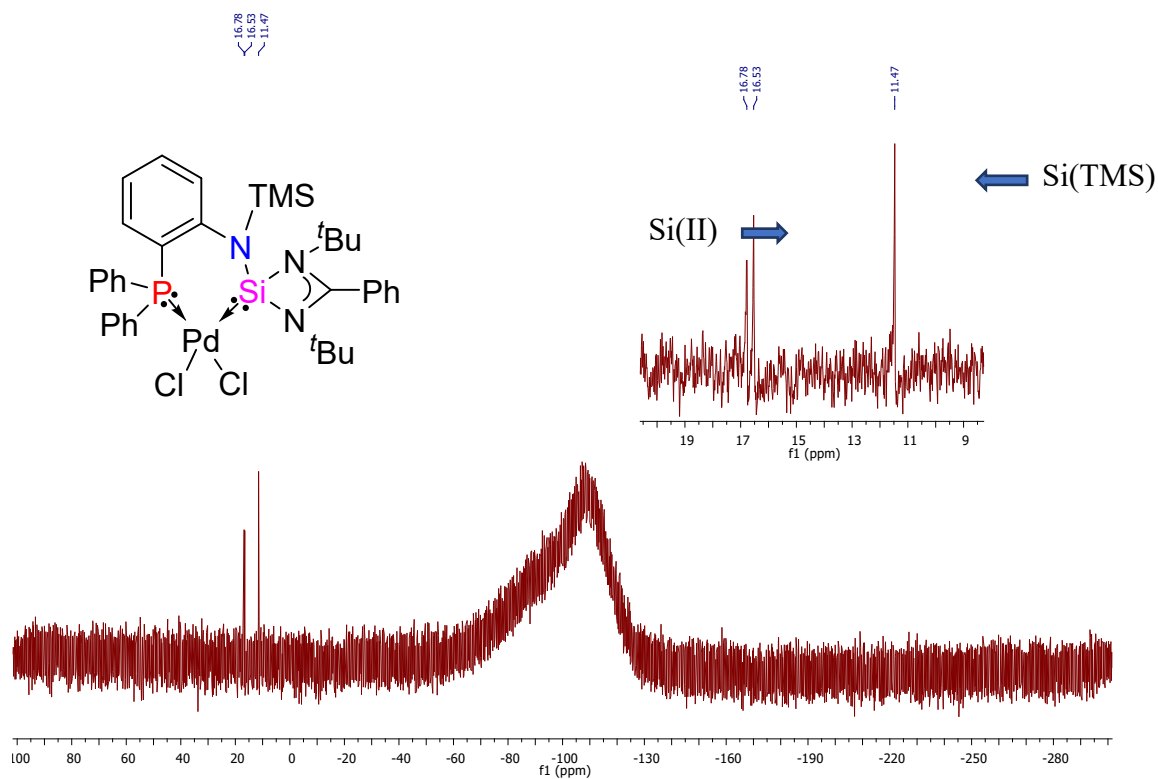

**$^{29}\text{Si}\{^1\text{H}\}$  NMR of 3**

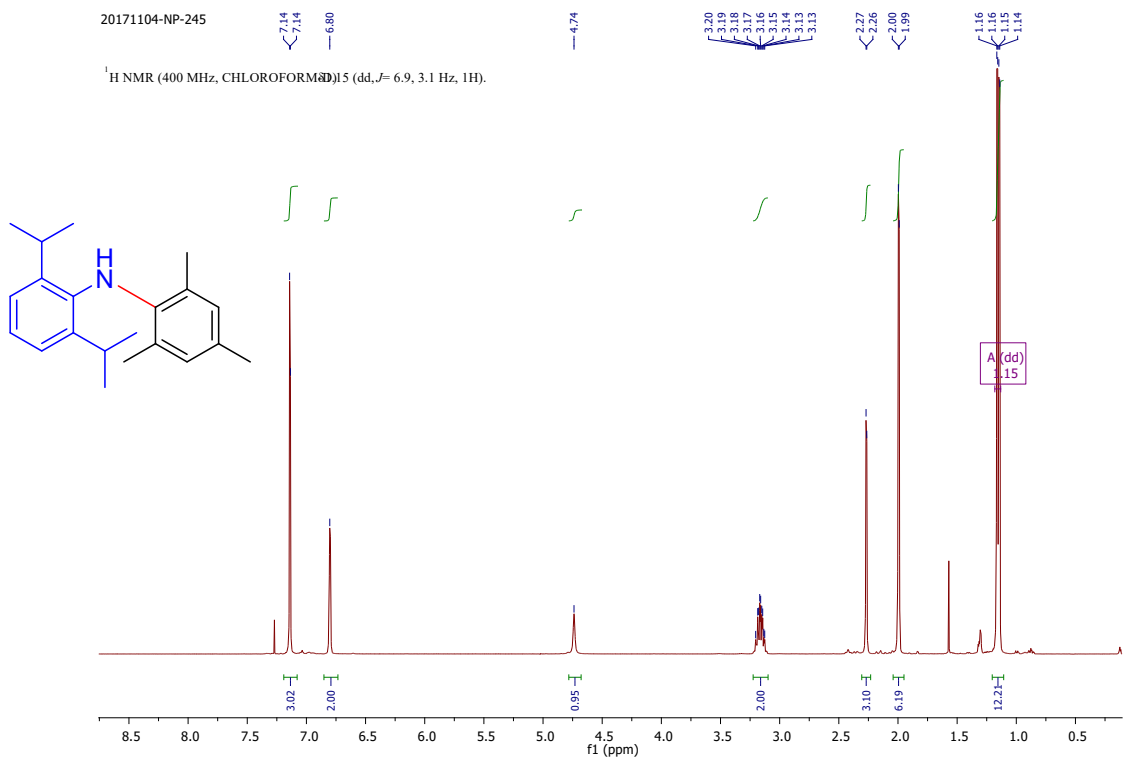

$^1\text{H NMR}$  of 4a

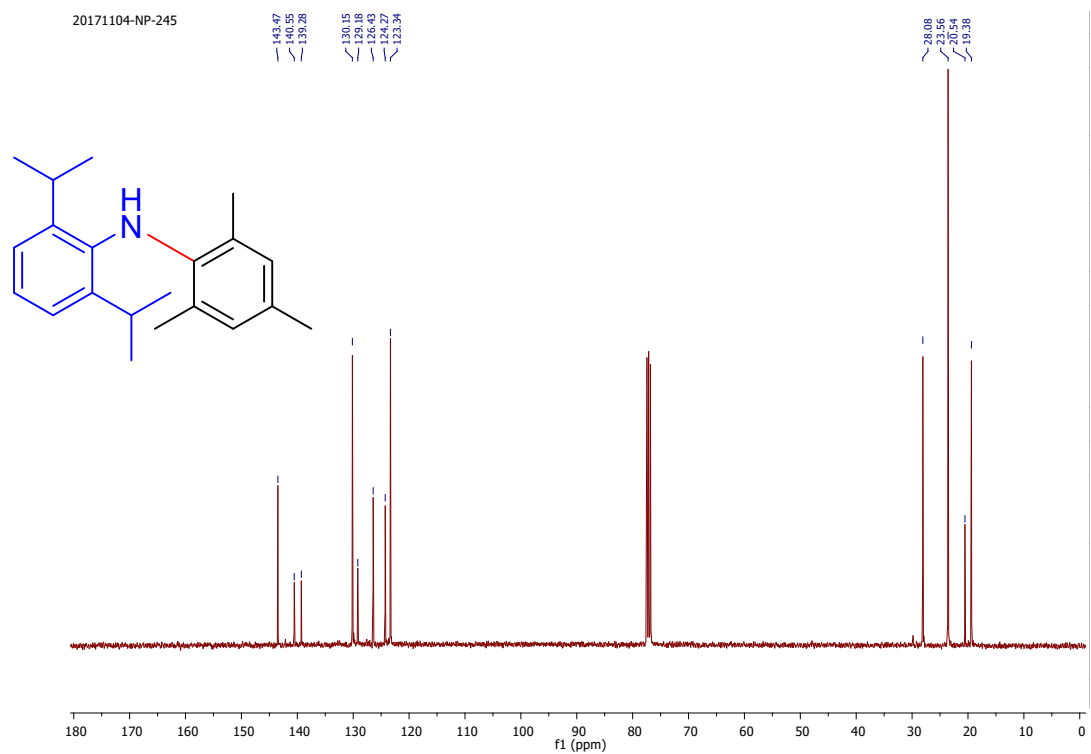

$^{13}\text{C}\{^1\text{H}\}$  NMR of 4a

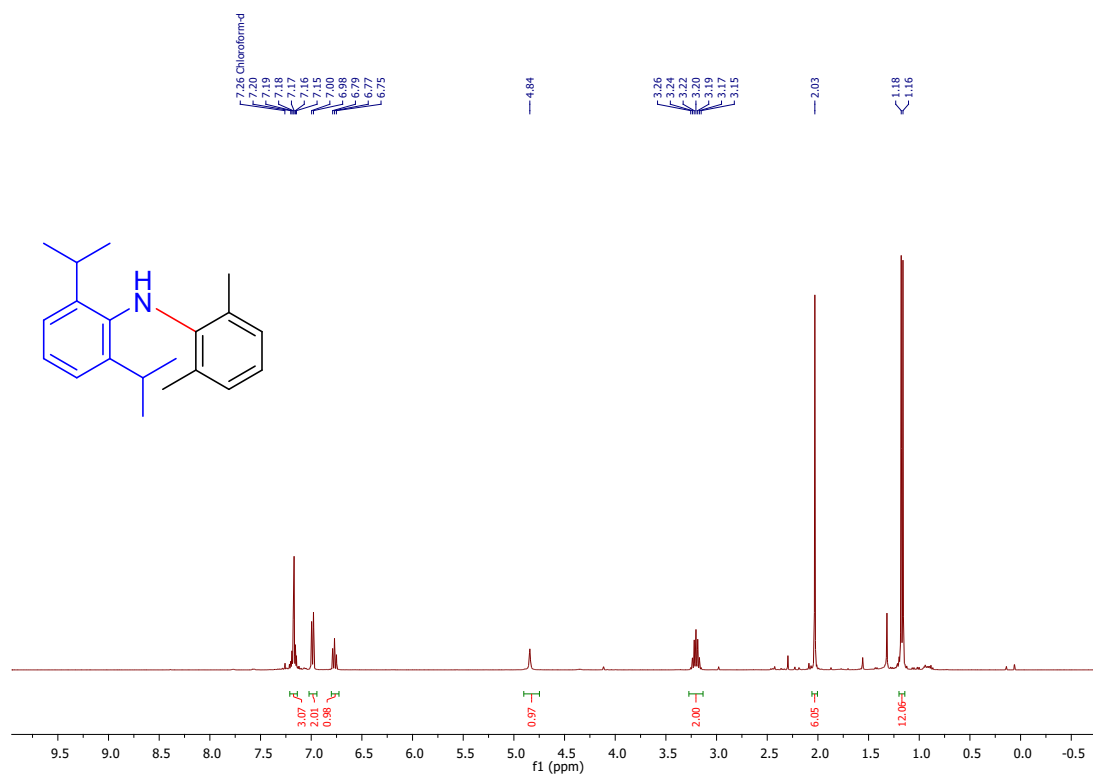

**<sup>1</sup>H NMR of 4b**

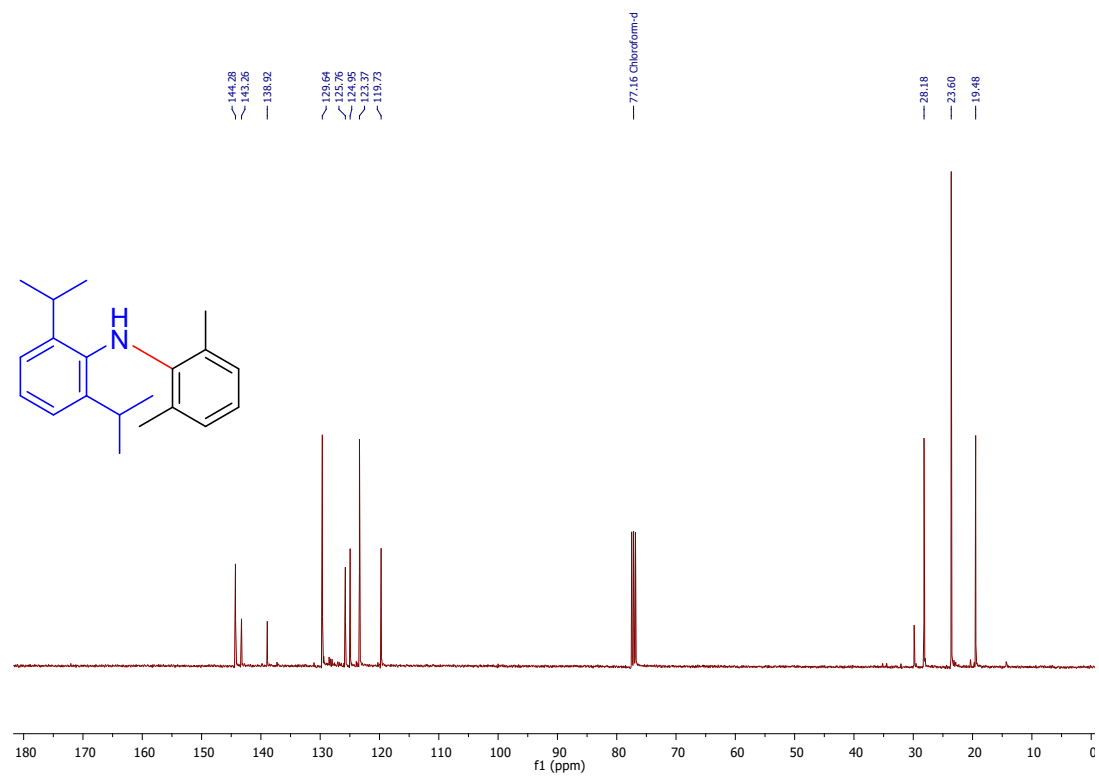

**<sup>13</sup>C{<sup>1</sup>H} NMR of 4b**



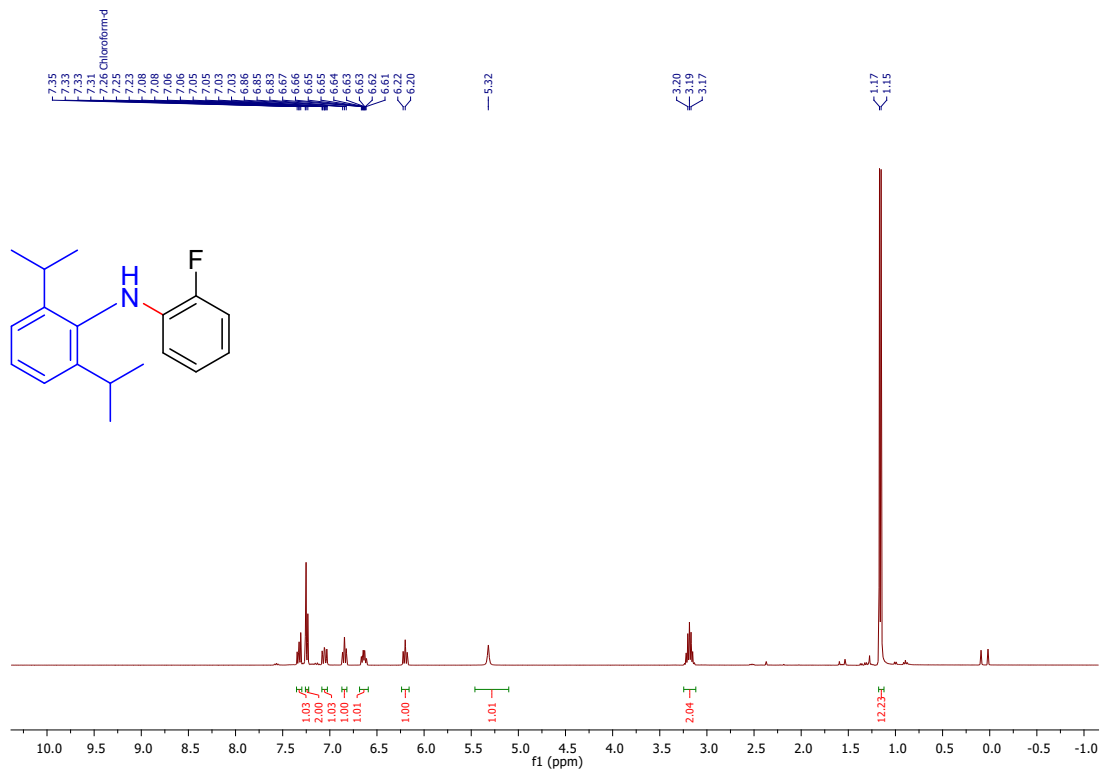

**<sup>1</sup>H NMR of 4c**

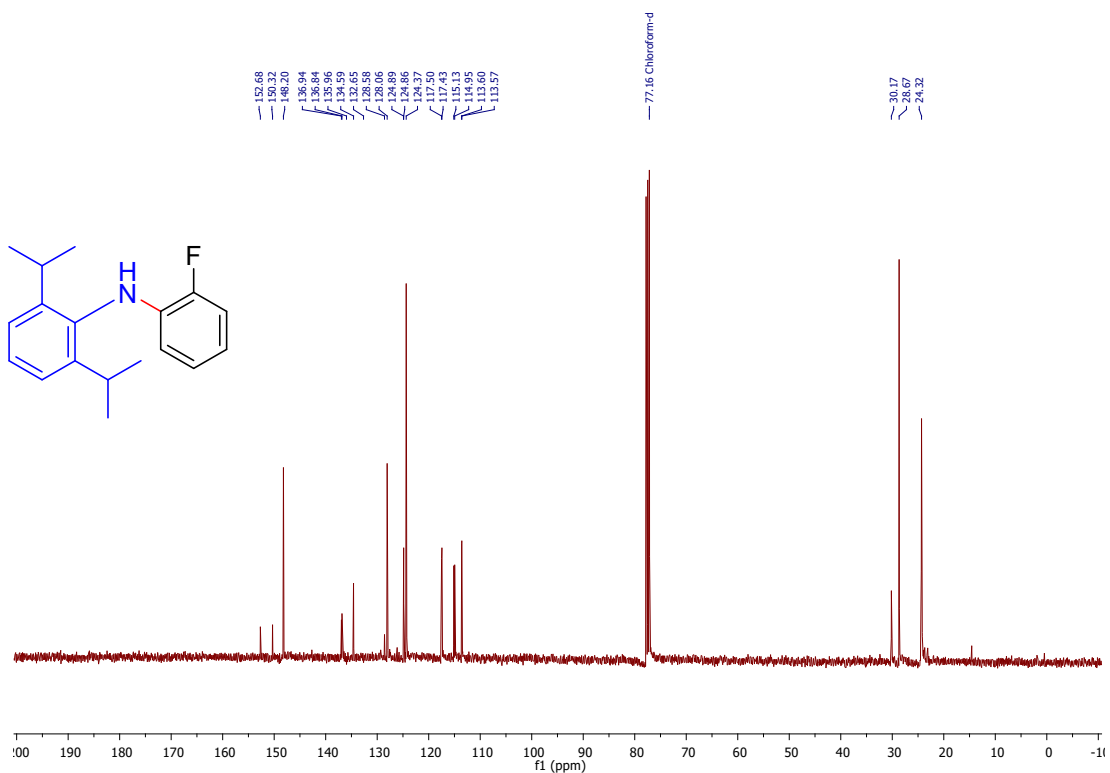

**<sup>13</sup>C{<sup>1</sup>H} NMR of 4c**

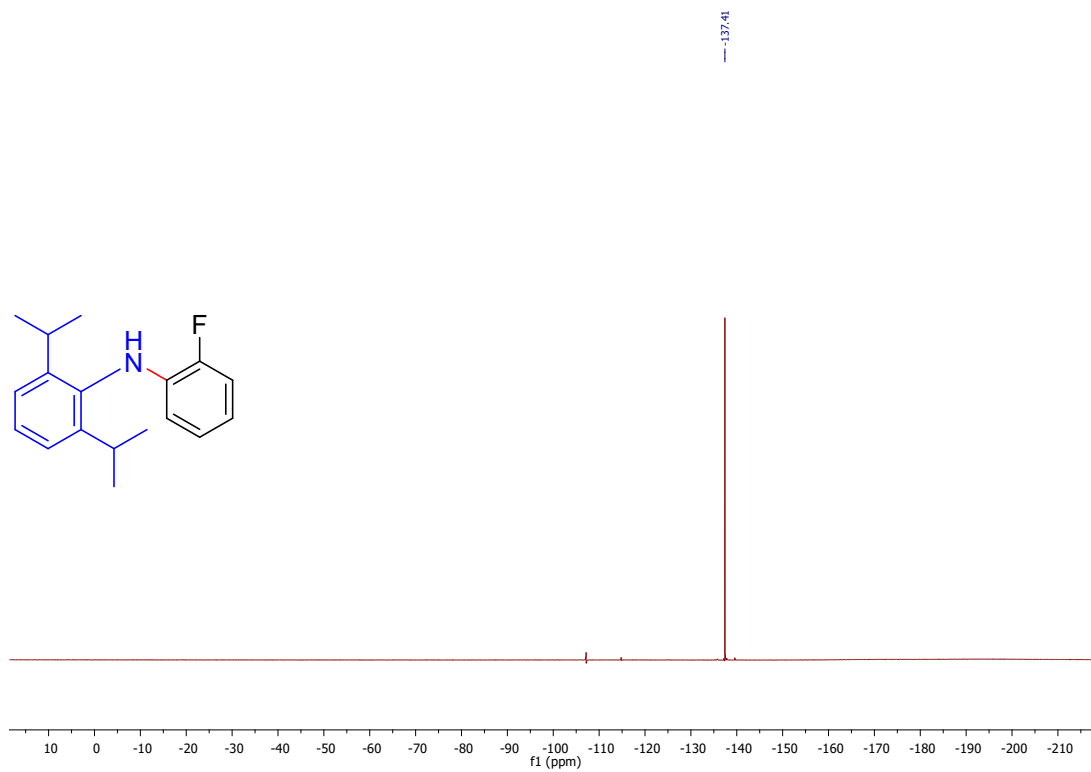

$^{19}\text{F}\{^1\text{H}\}$  NMR of 4c

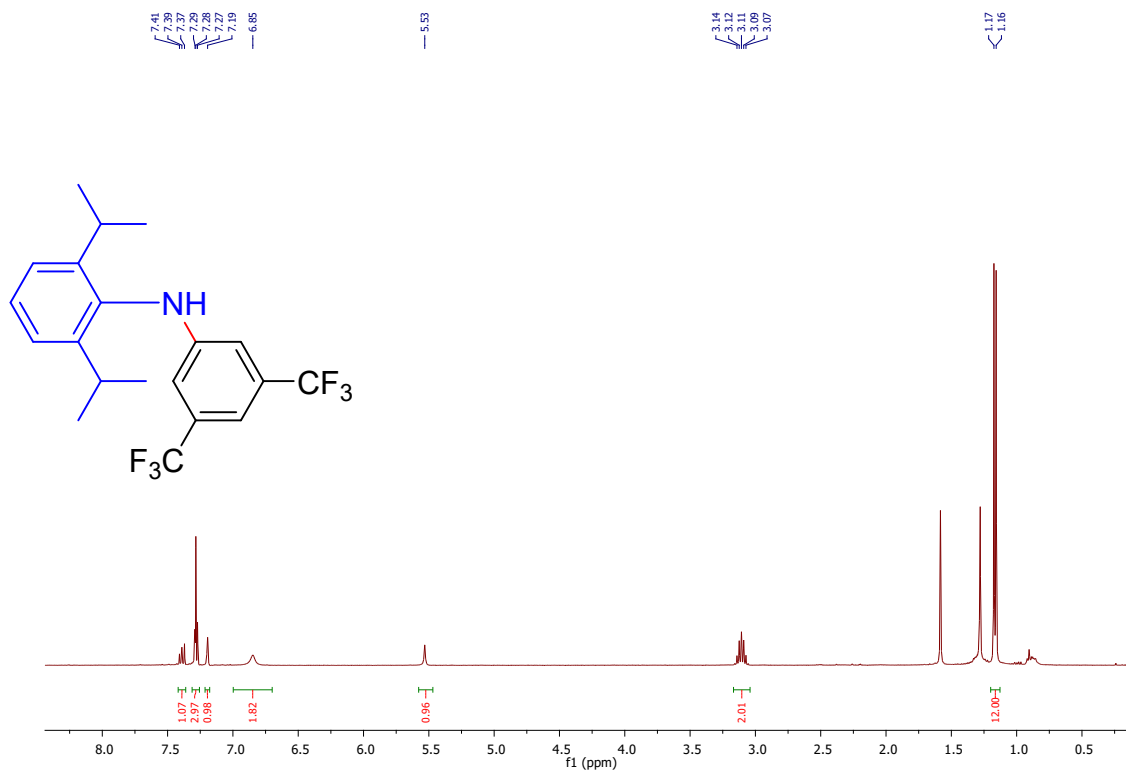

$^1\text{H}$  NMR of 4d

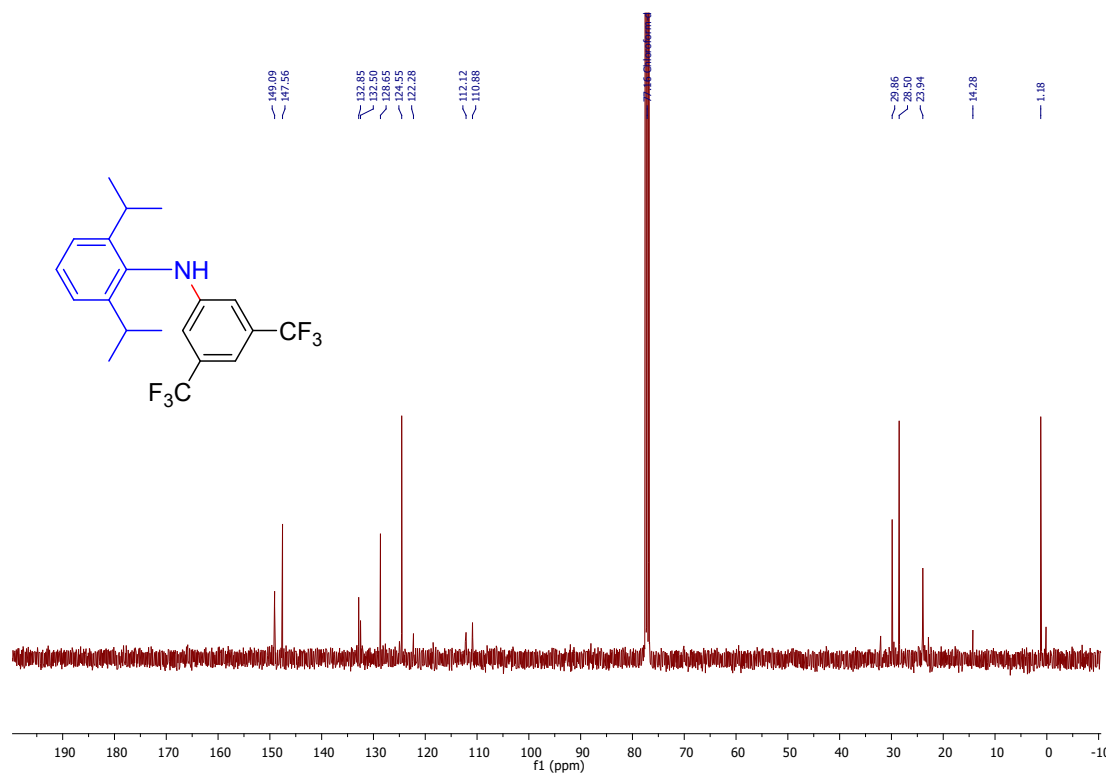

$^{13}\text{C}\{^1\text{H}\}$  NMR of 4d

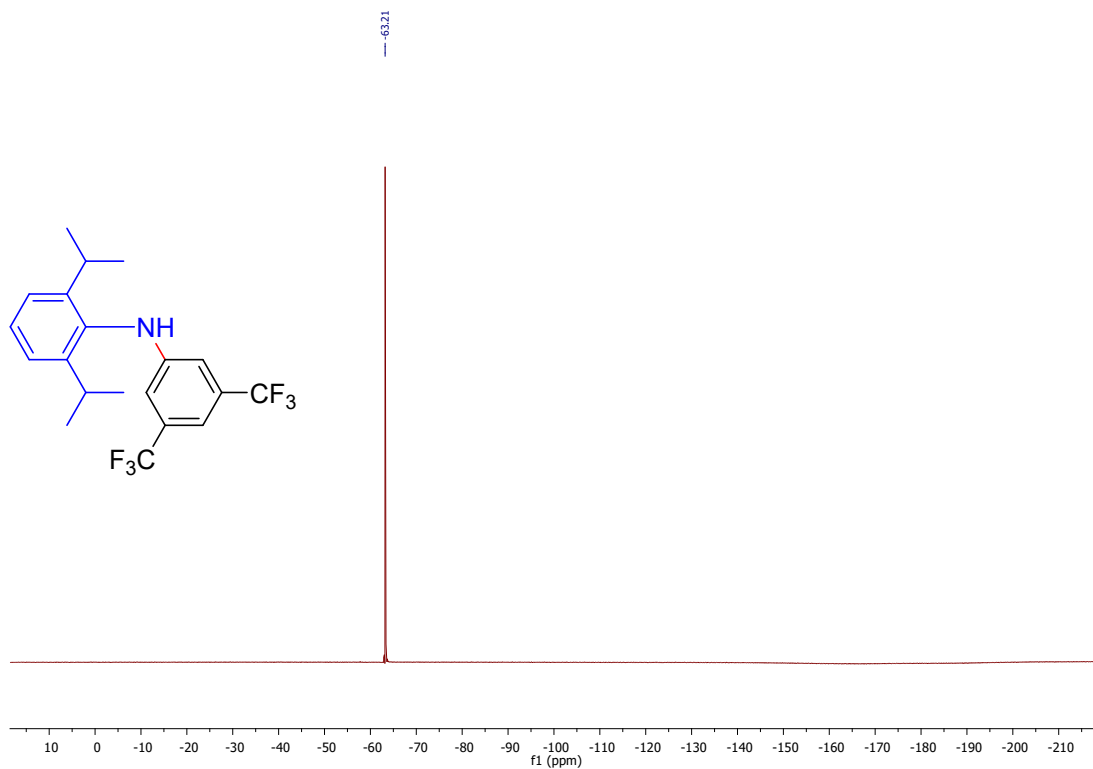

$^{19}\text{F}\{^1\text{H}\}$  NMR of 4d

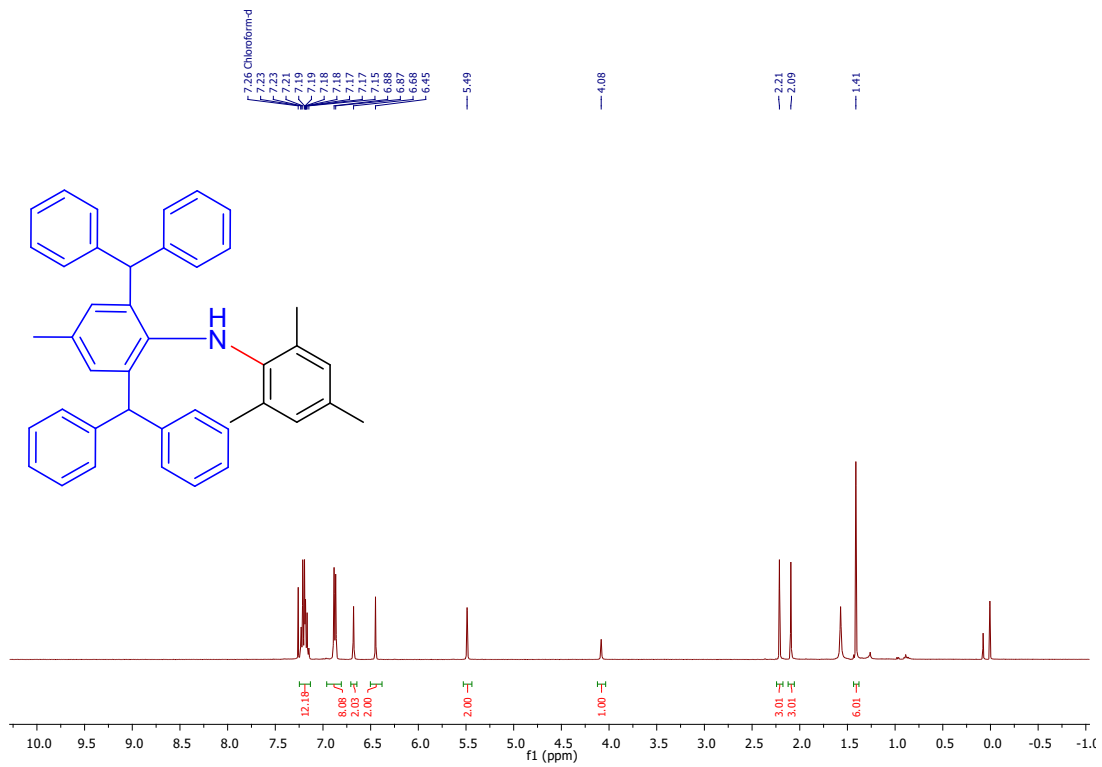

**<sup>1</sup>H NMR of 4e**

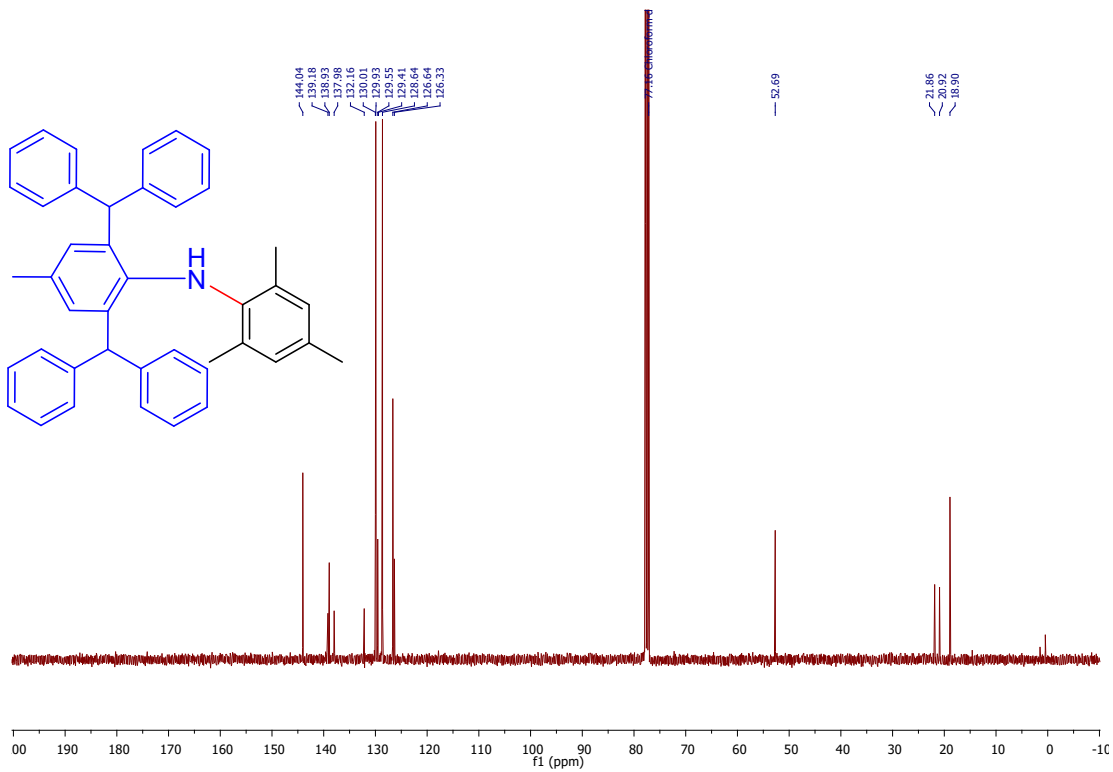

**<sup>13</sup>C{<sup>1</sup>H} NMR of 4e**

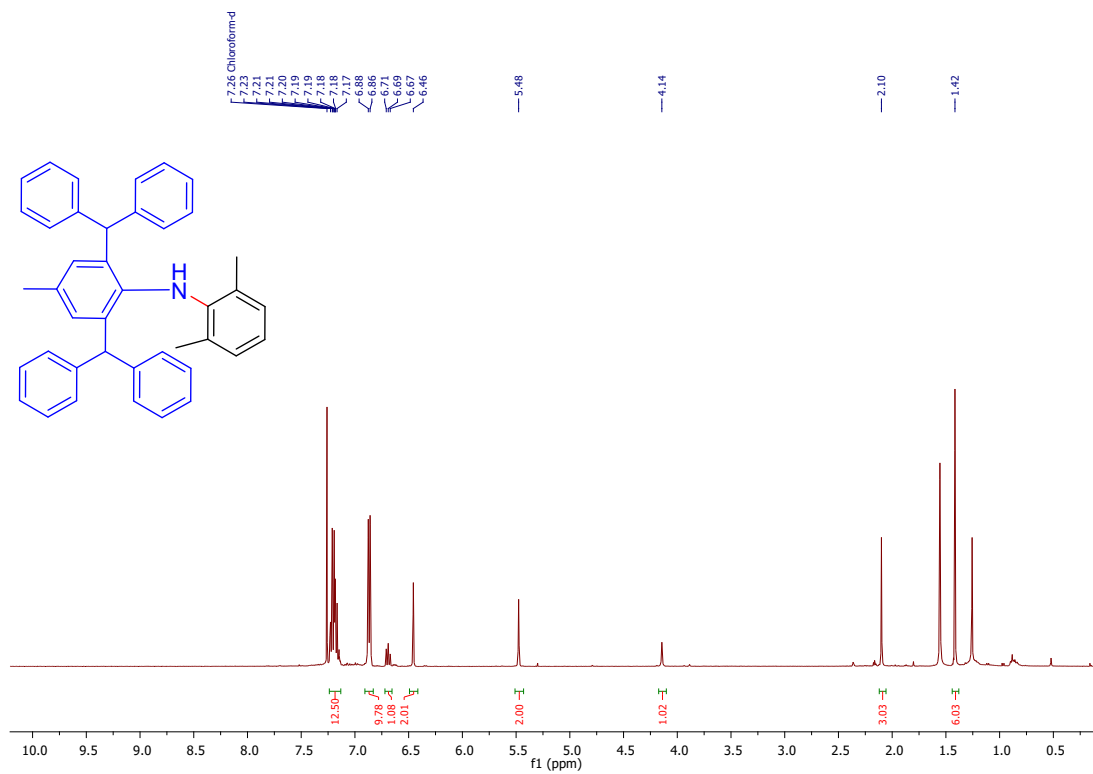

**<sup>1</sup>H NMR of 4f**

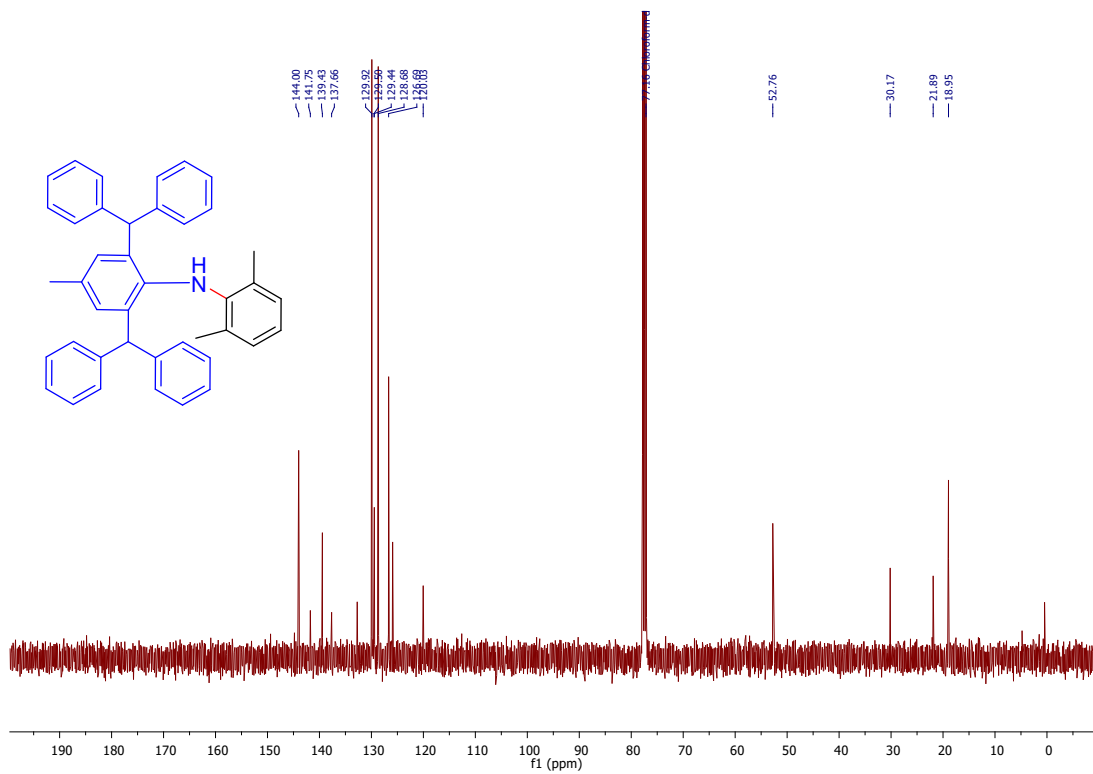

**<sup>13</sup>C{<sup>1</sup>H} NMR of 4f**

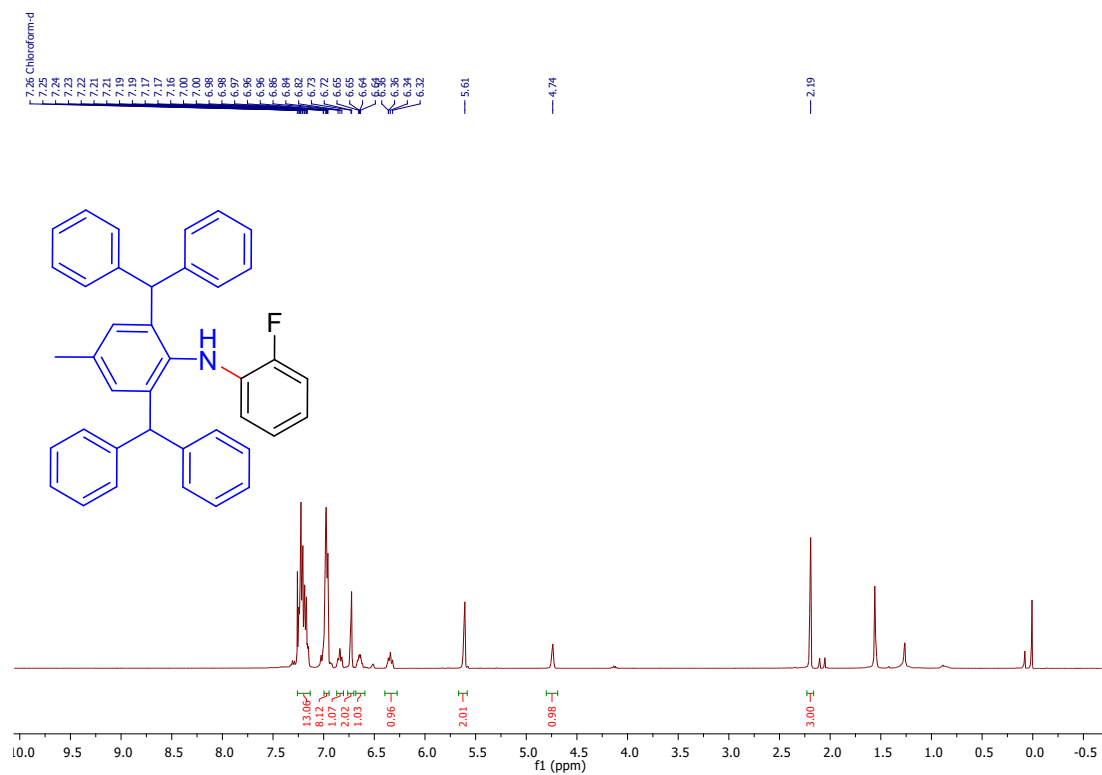

<sup>1</sup>H NMR of 4g

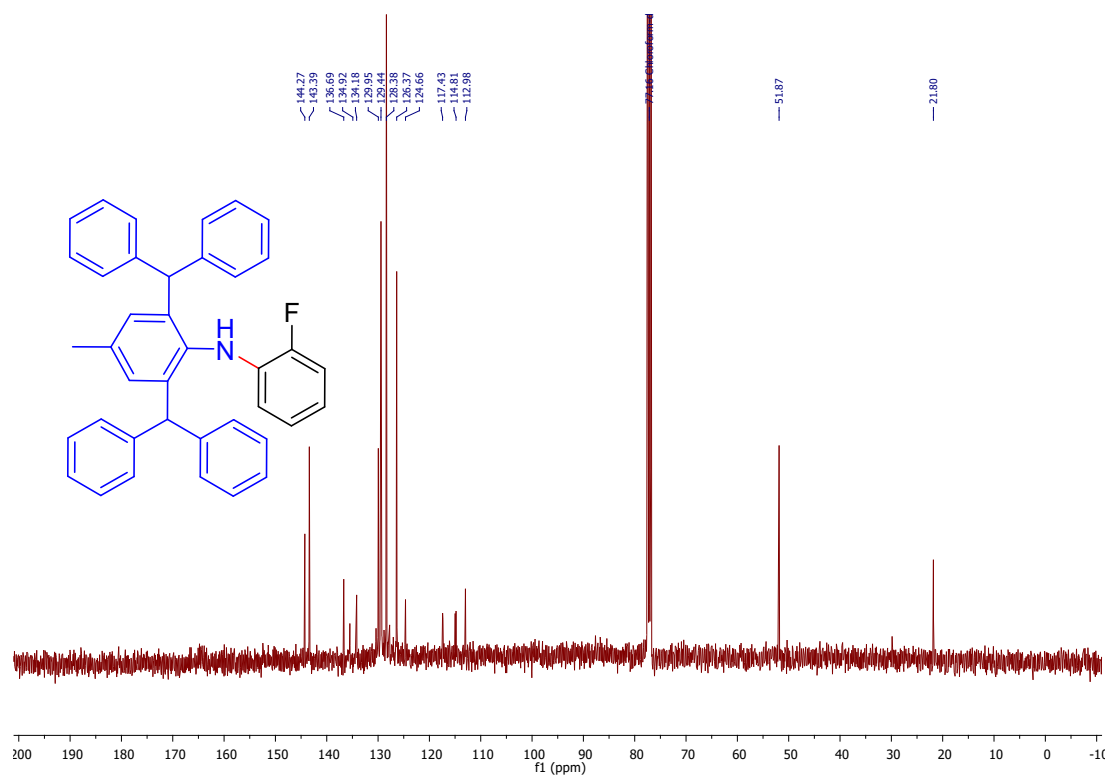

# $^{13}\text{C}\{^1\text{H}\}$ NMR of 4g

S#412589  
single\_pulse

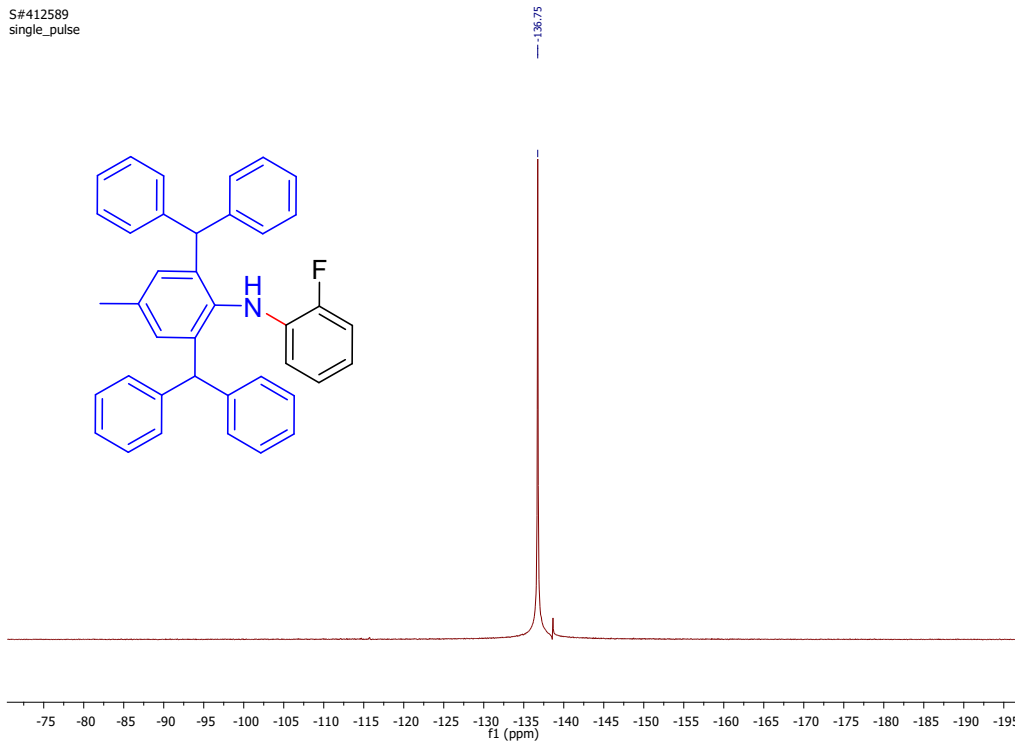

# $^{19}\text{F}\{^1\text{H}\}$ NMR of 4g

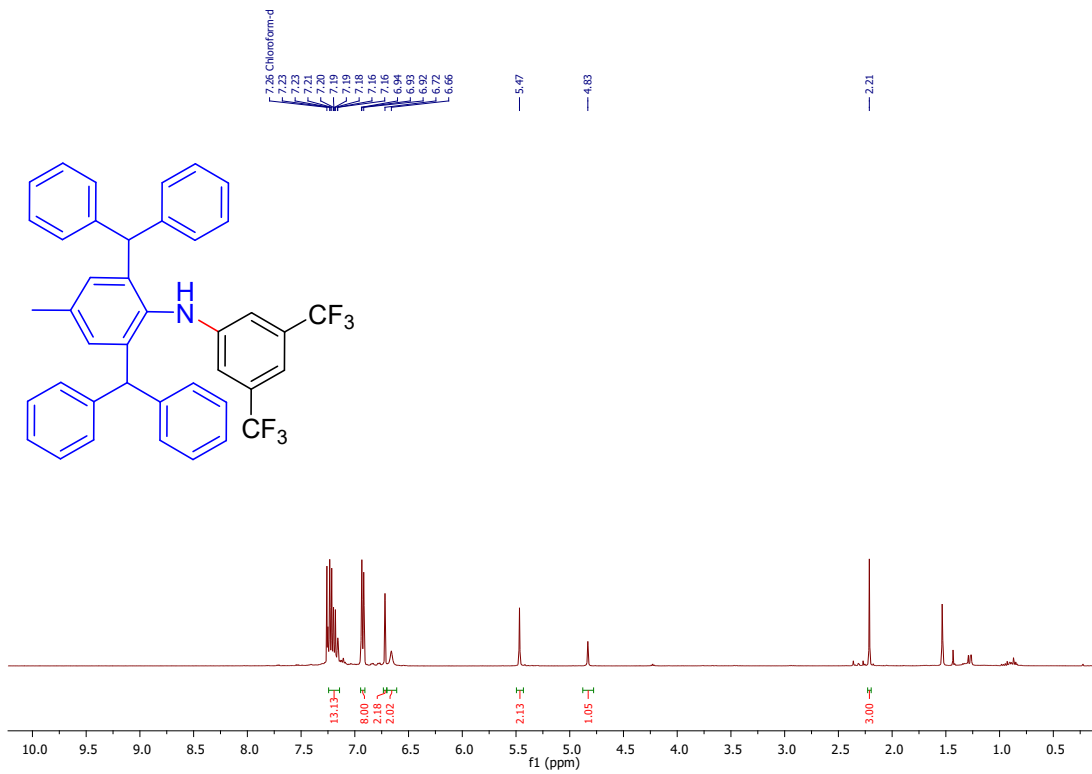

### $^1\text{H}$ NMR of 4h

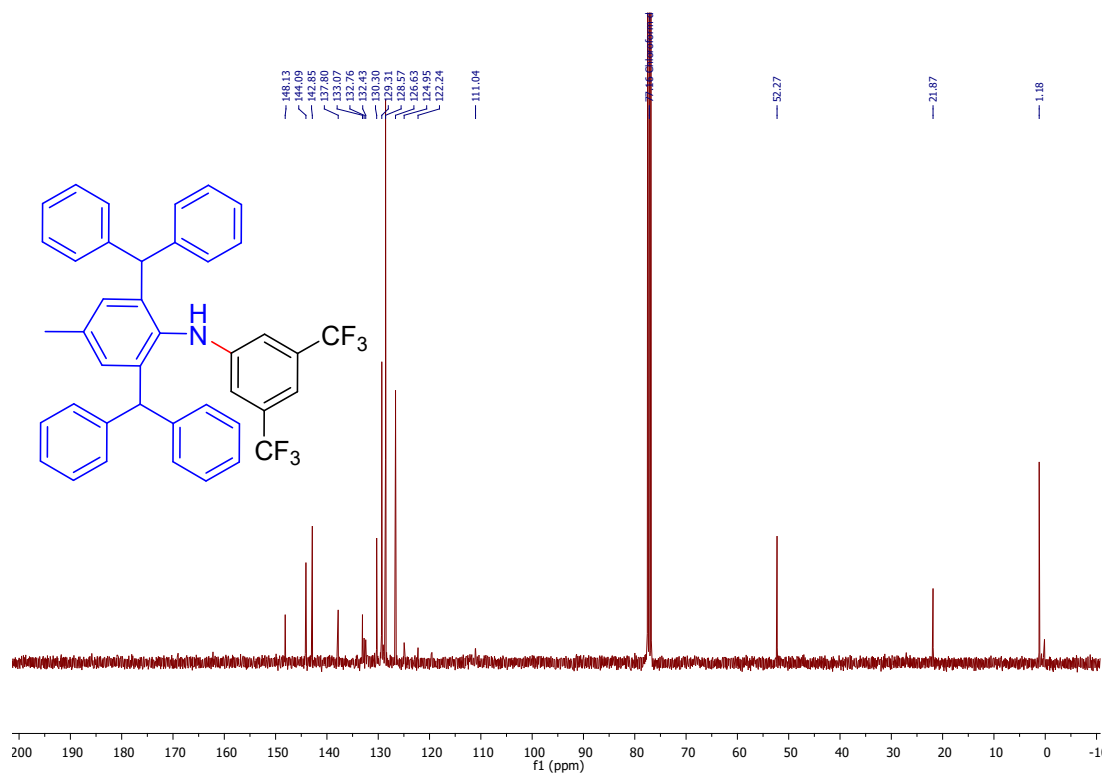

### $^{13}\text{C}\{^1\text{H}\}$ NMR of 4h

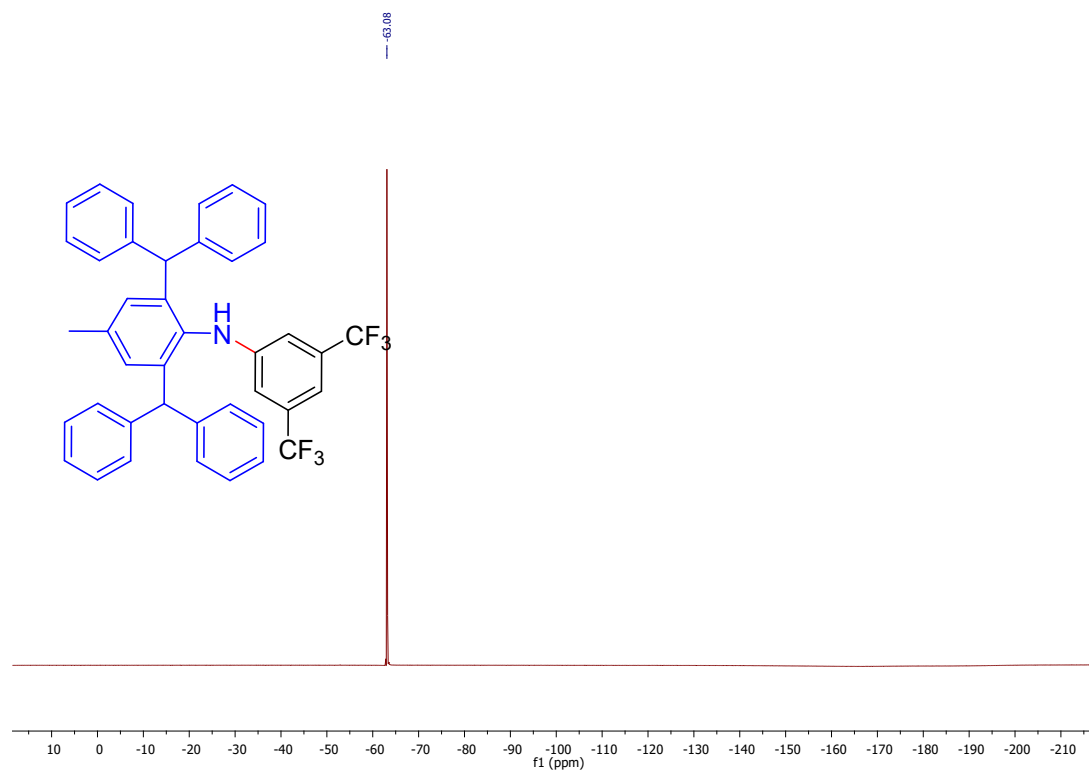



### $^{19}\text{F}\{^1\text{H}\}$ NMR of 4h

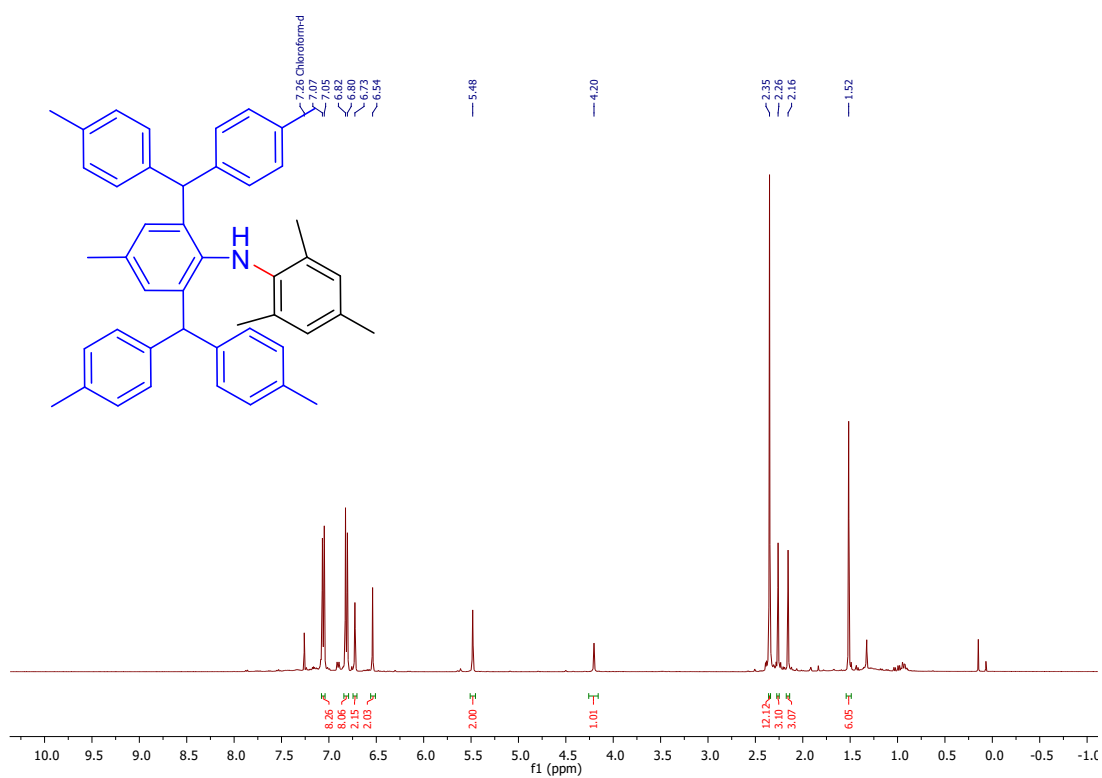

### $^1\text{H}$ NMR of 4i

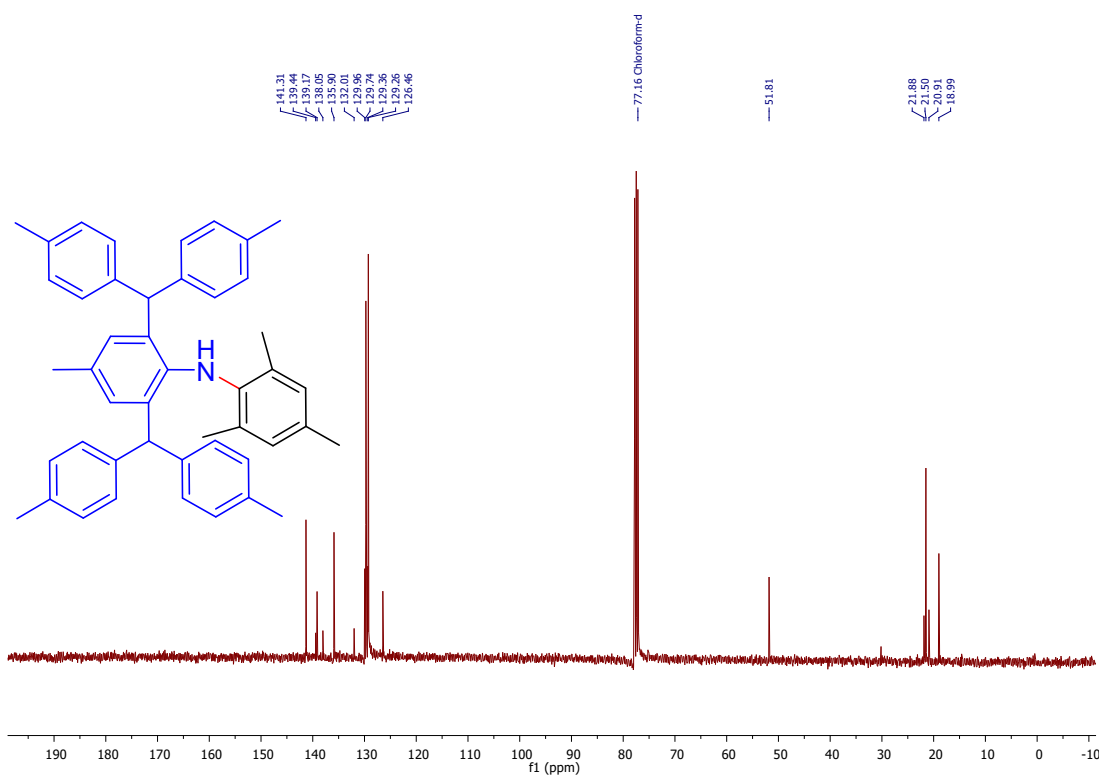

### $^{13}\text{C}\{^1\text{H}\}$ NMR of 4i

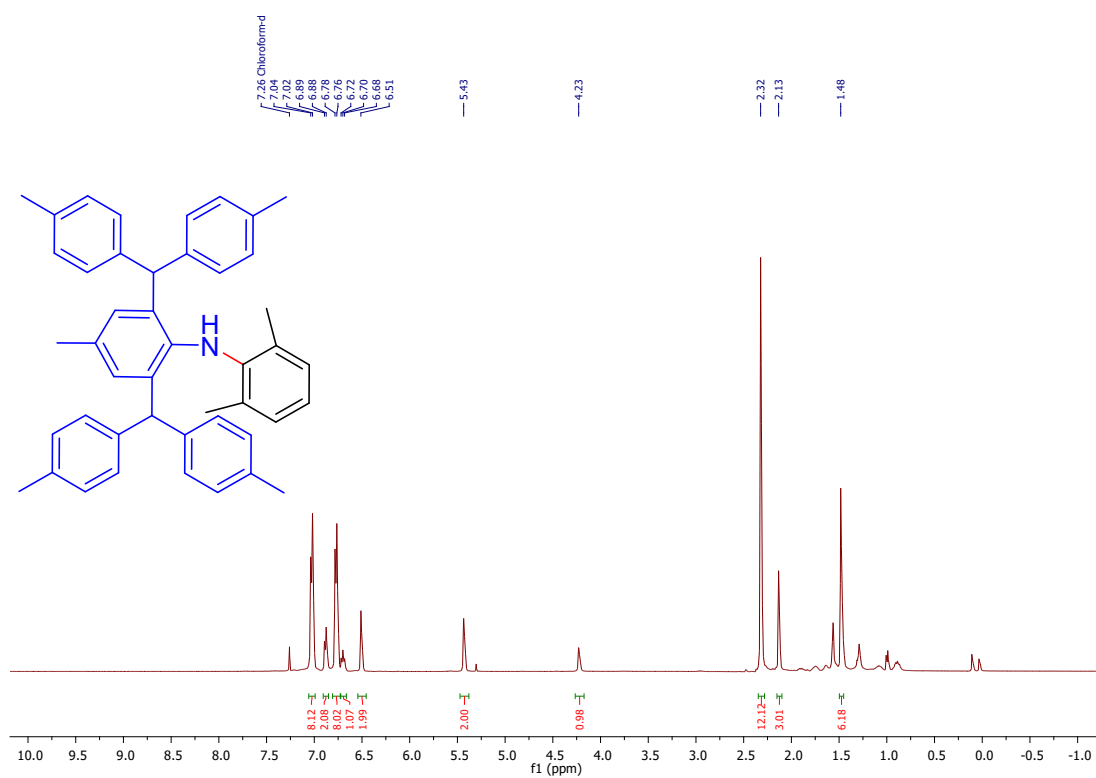

### $^1\text{H}$ NMR of 4j

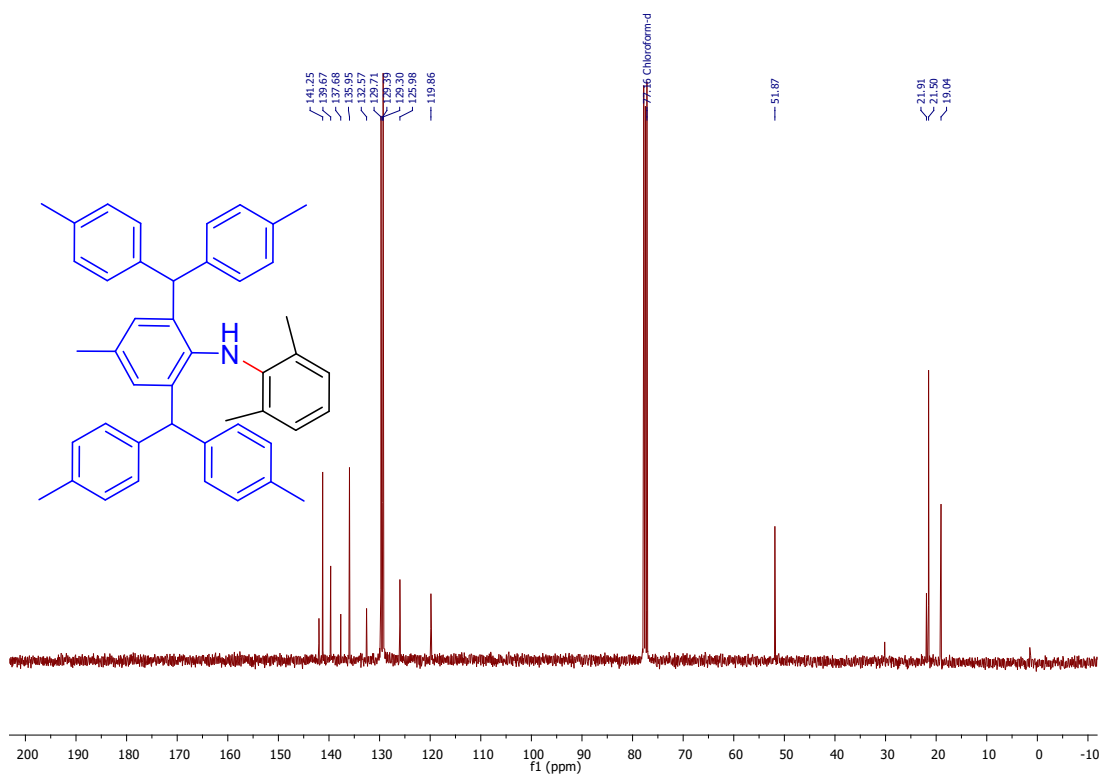

### $^{13}\text{C}\{^1\text{H}\}$ NMR of 4j

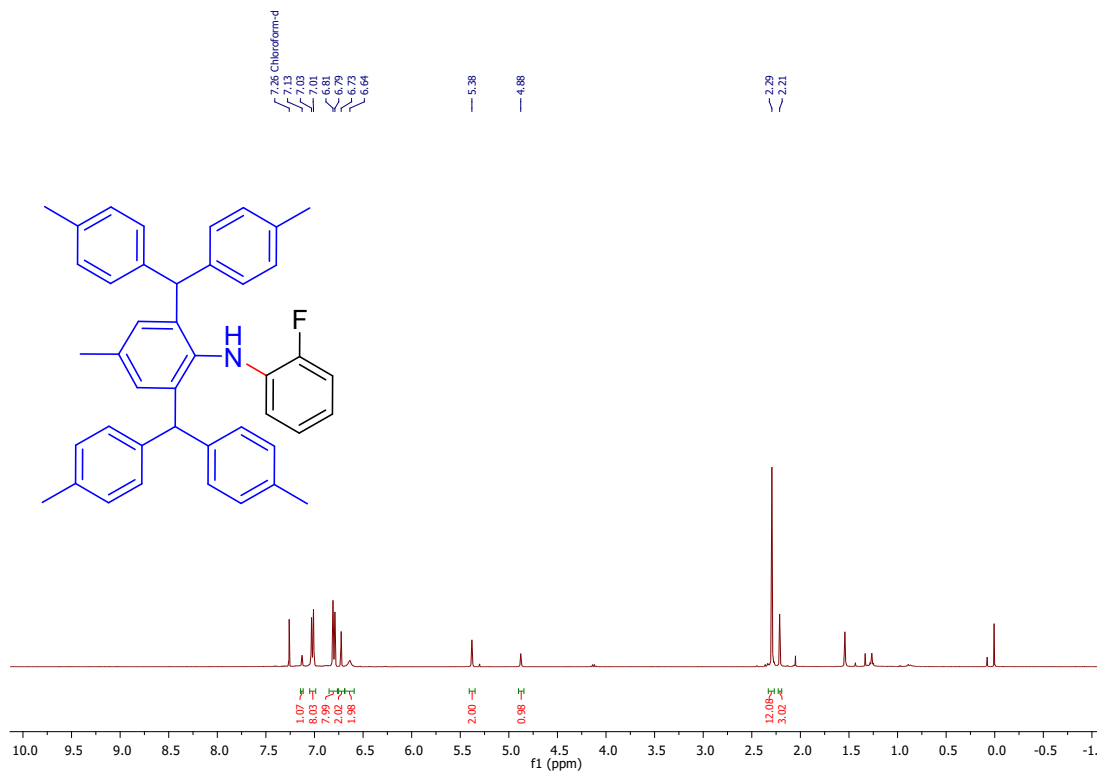

### $^1\text{H}$ NMR of 4k

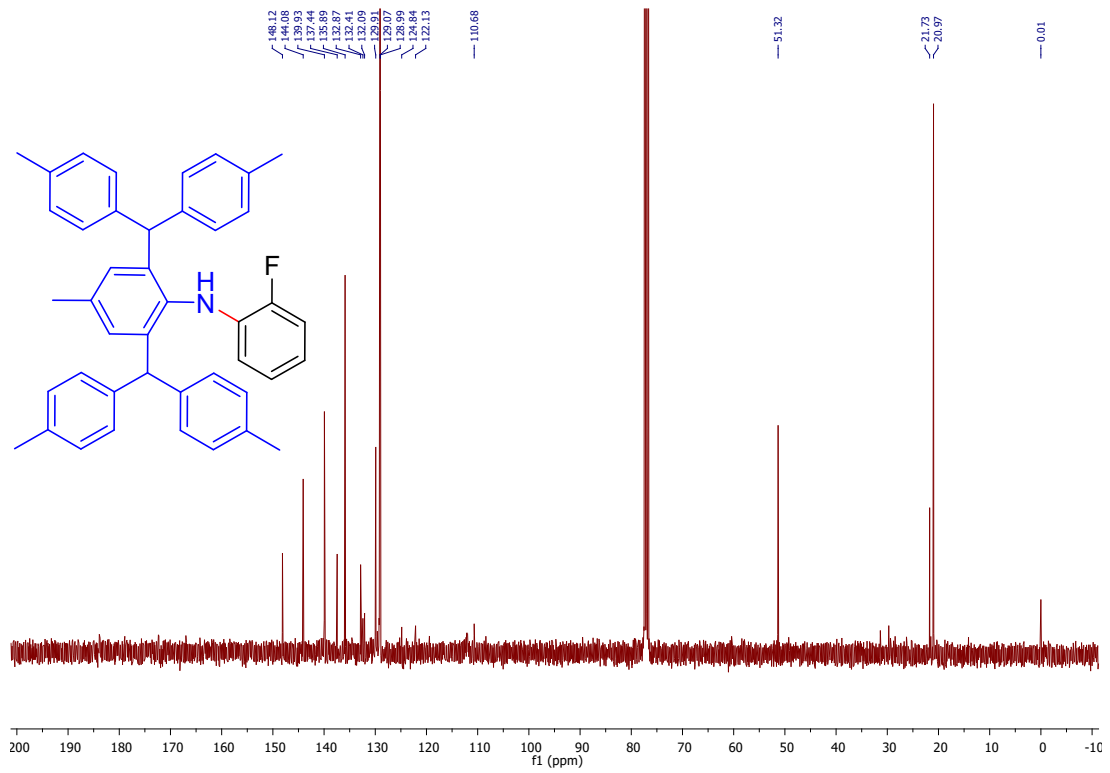

### $^{13}\text{C}\{^1\text{H}\}$ NMR of 4k

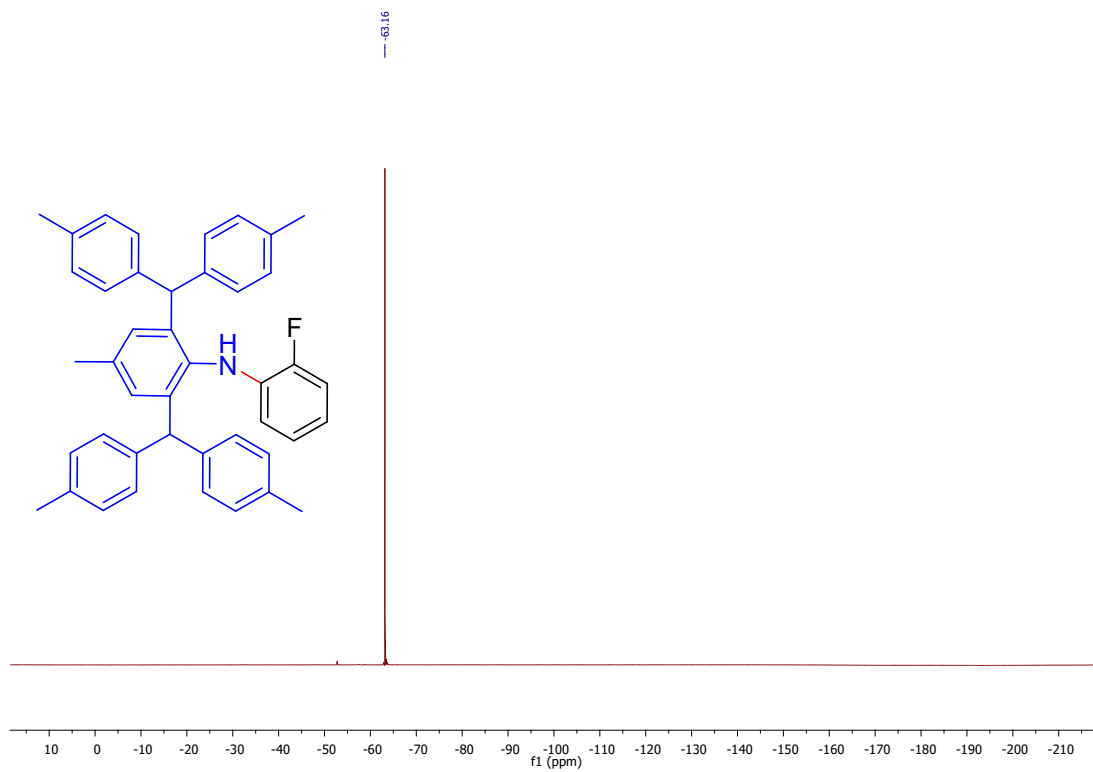

$^{19}\text{F}\{^1\text{H}\}$  NMR of 4k

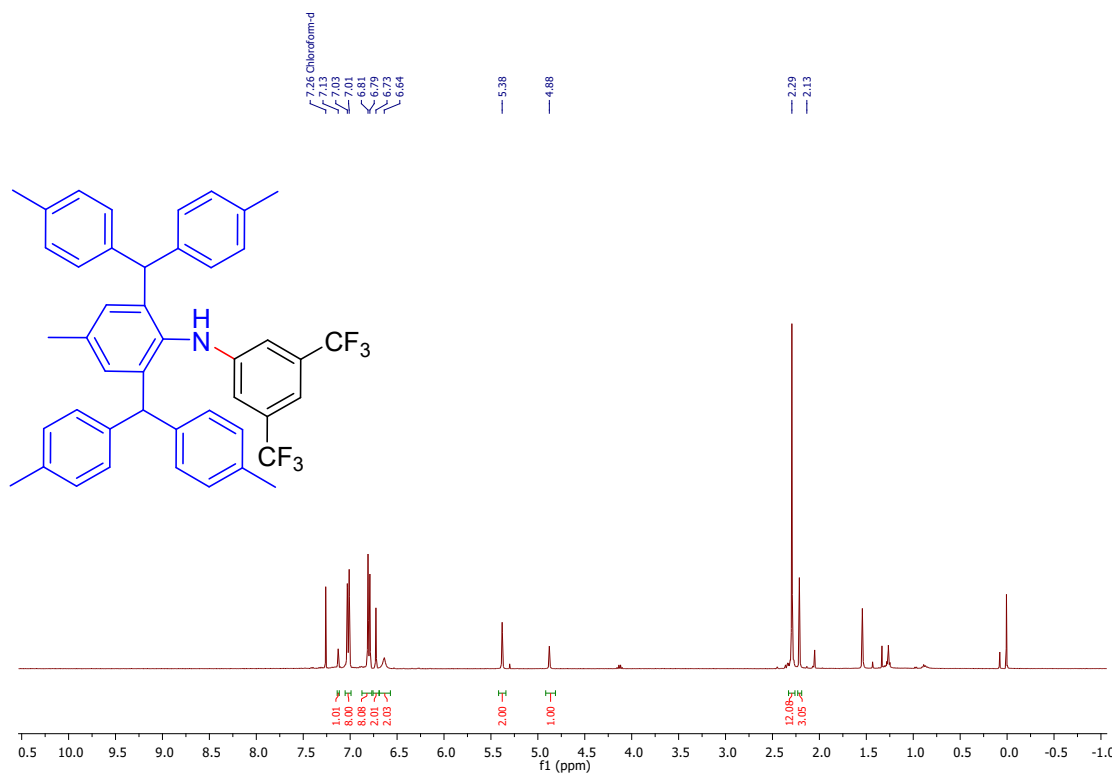

$^1\text{H}$  NMR of 4l

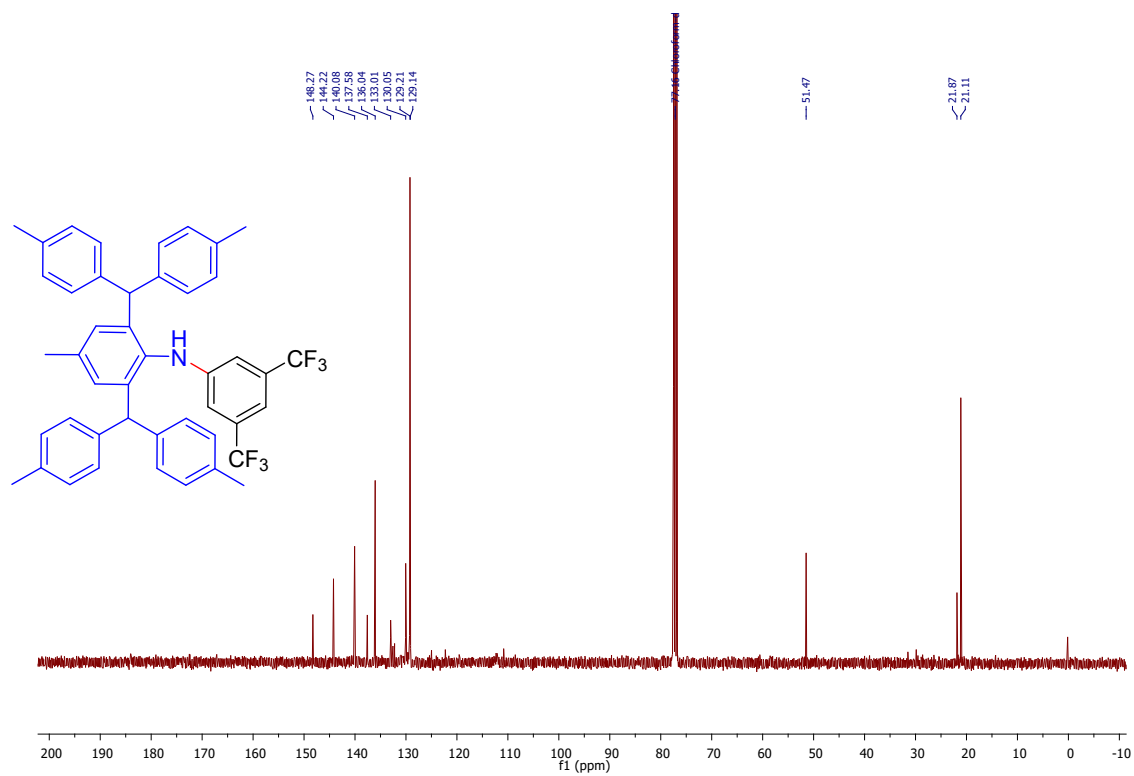

$^{13}\text{C}\{^1\text{H}\}$  NMR of 4l

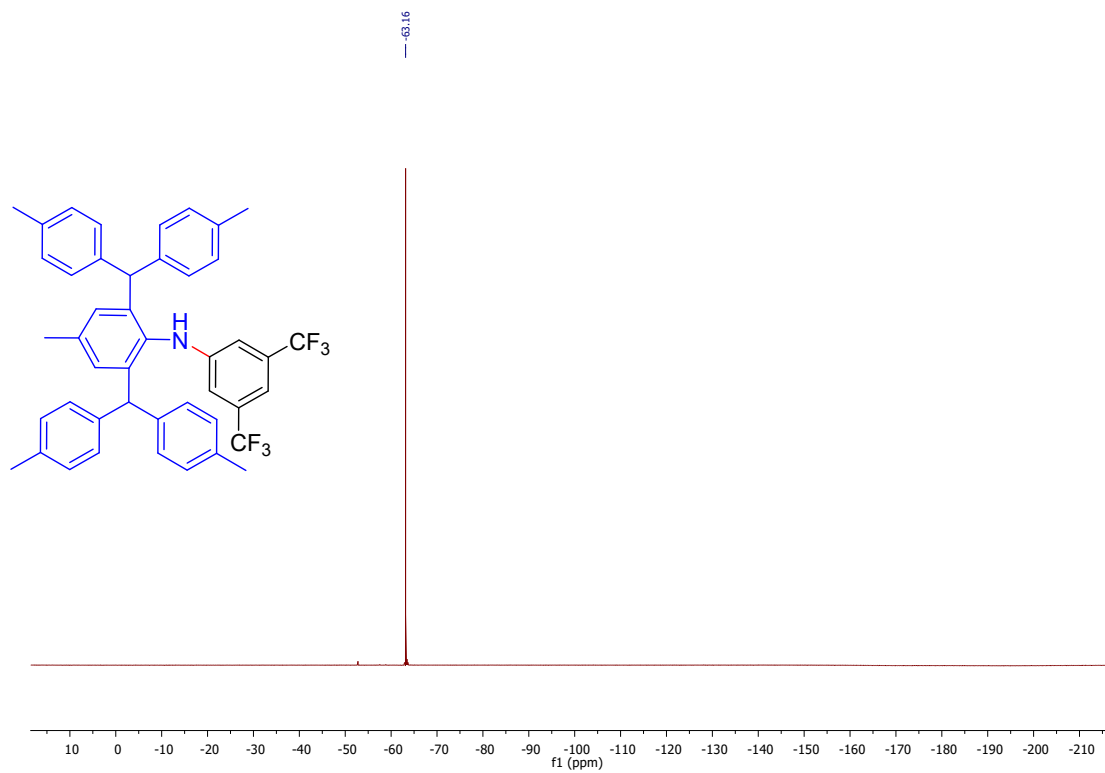

$^{19}\text{F}\{^1\text{H}\}$  NMR of 4l

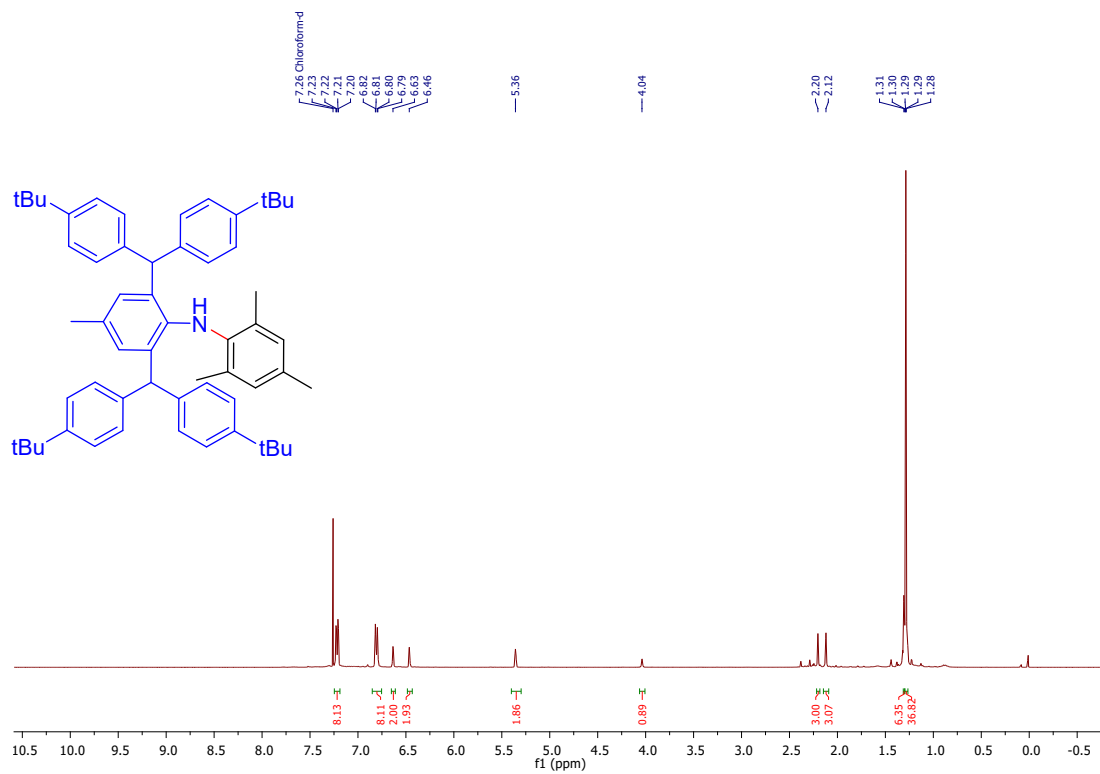

**<sup>1</sup>H NMR of 4m**

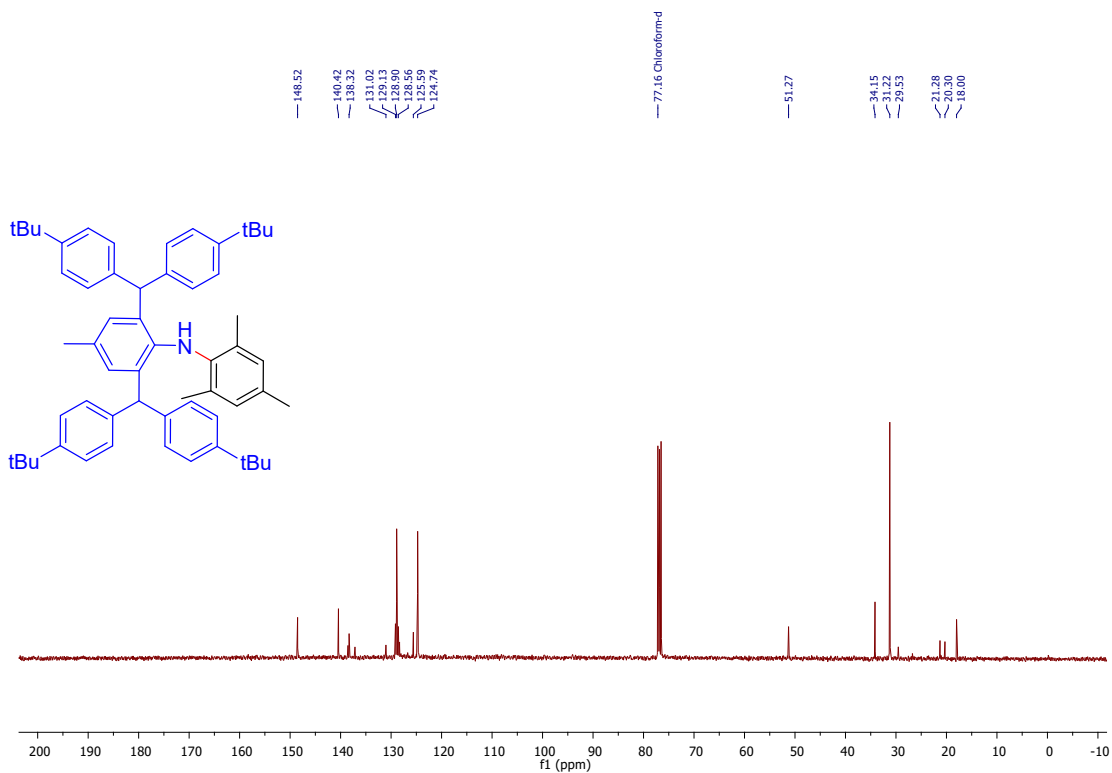

**<sup>13</sup>C{<sup>1</sup>H} NMR of 4m**

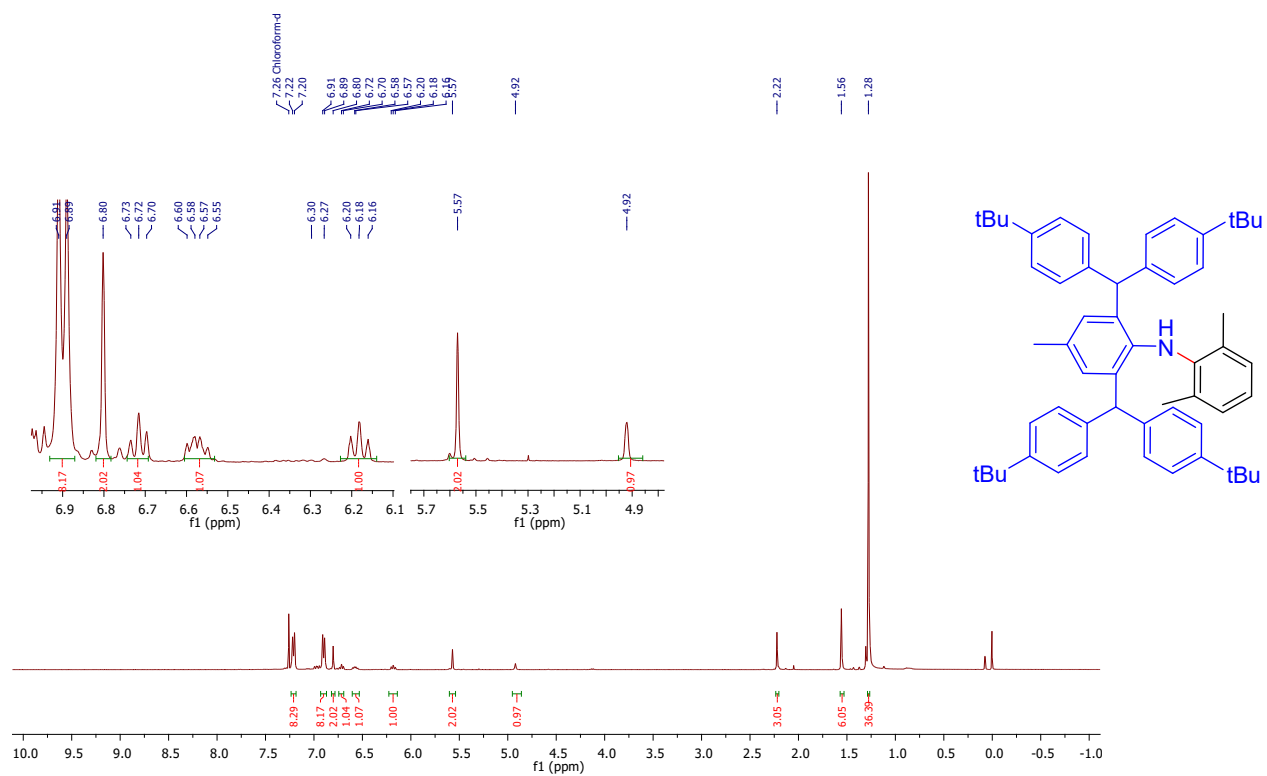

**<sup>1</sup>H NMR of 4n**

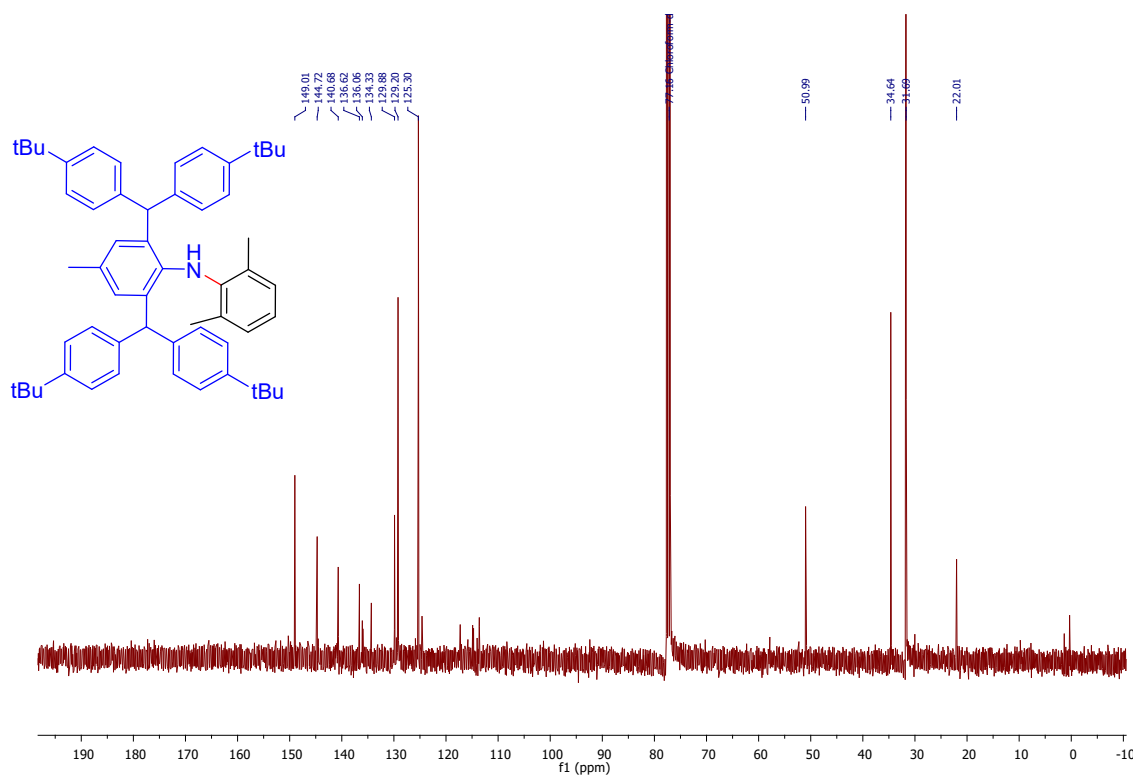

**<sup>13</sup>C{<sup>1</sup>H} NMR of 4n**

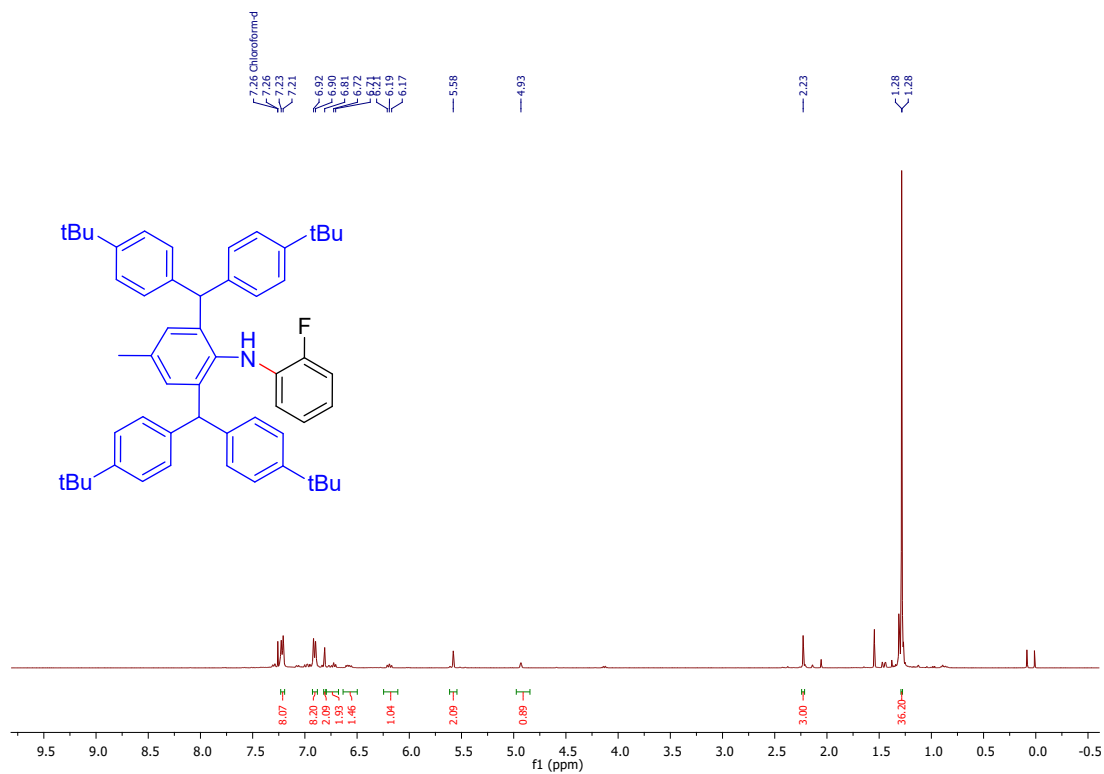

**<sup>1</sup>H NMR of 4o**

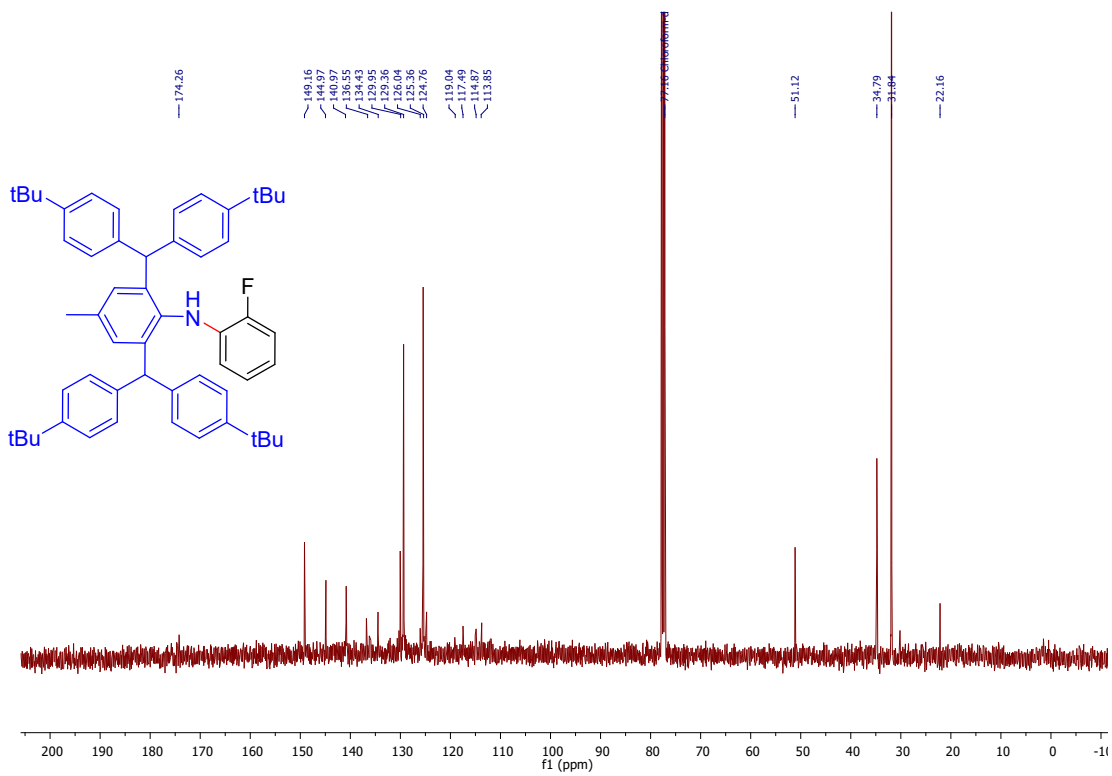

**<sup>13</sup>C{<sup>1</sup>H} NMR of 4o**



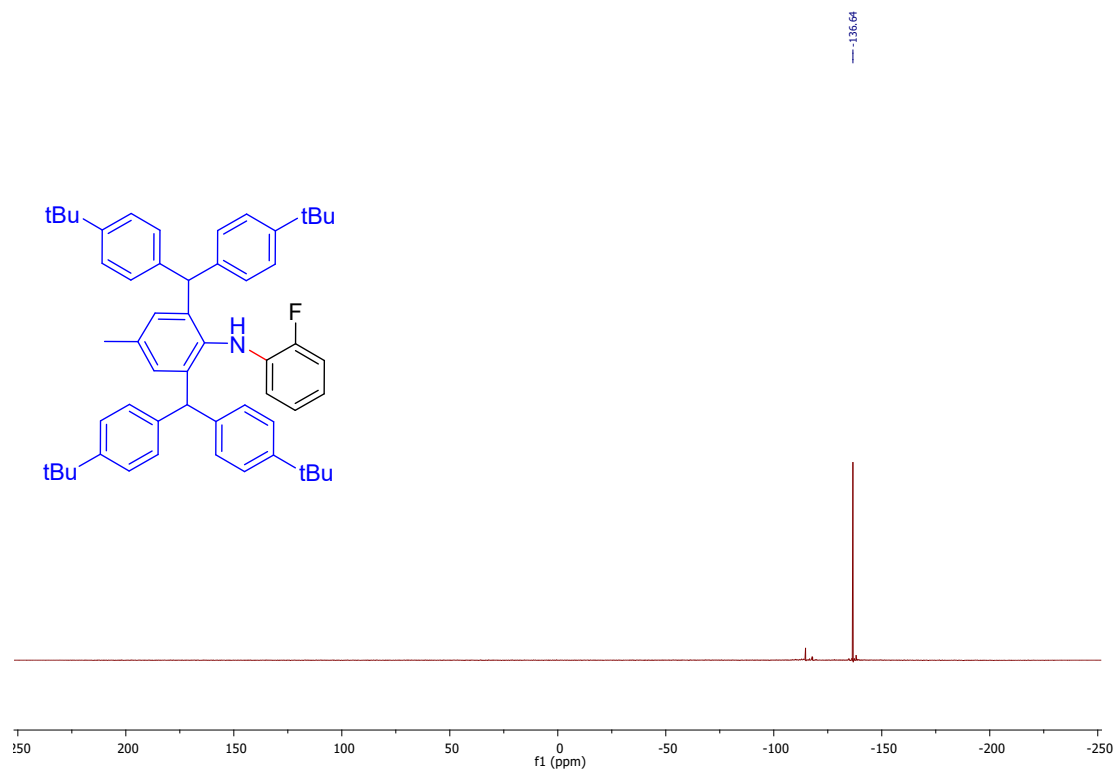

$^{19}\text{F}\{^1\text{H}\}$  NMR of 4o

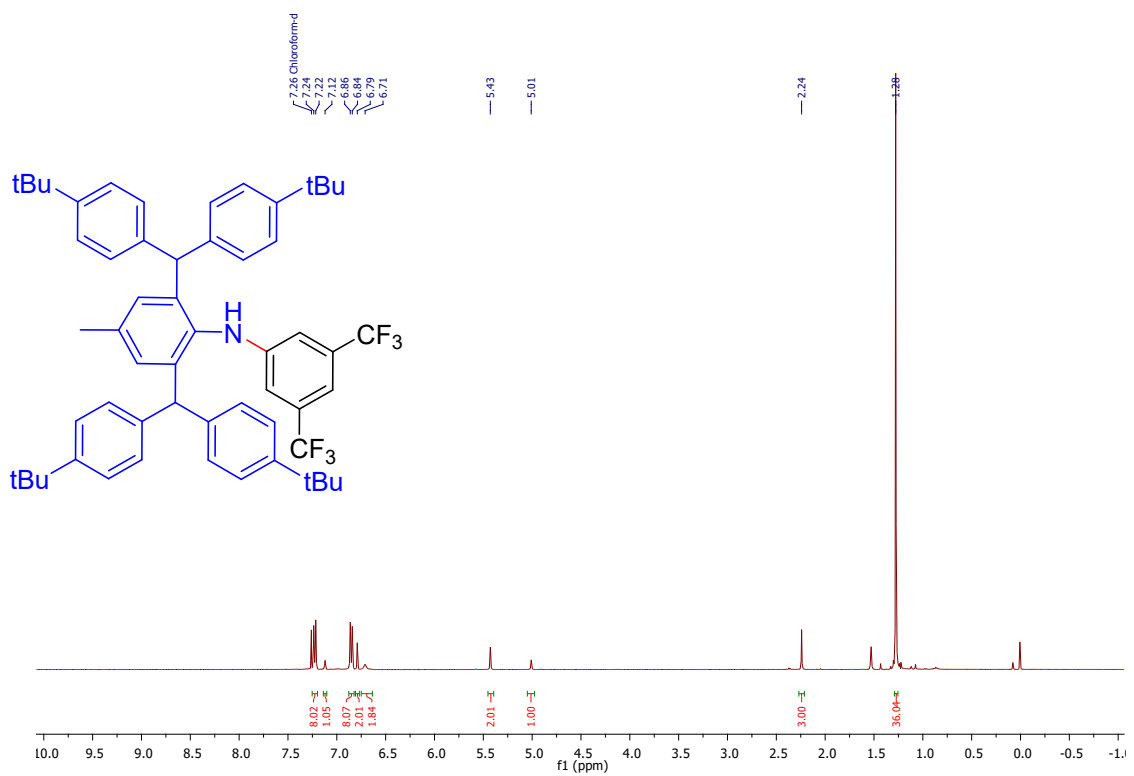

$^1\text{H}$  NMR of 4p

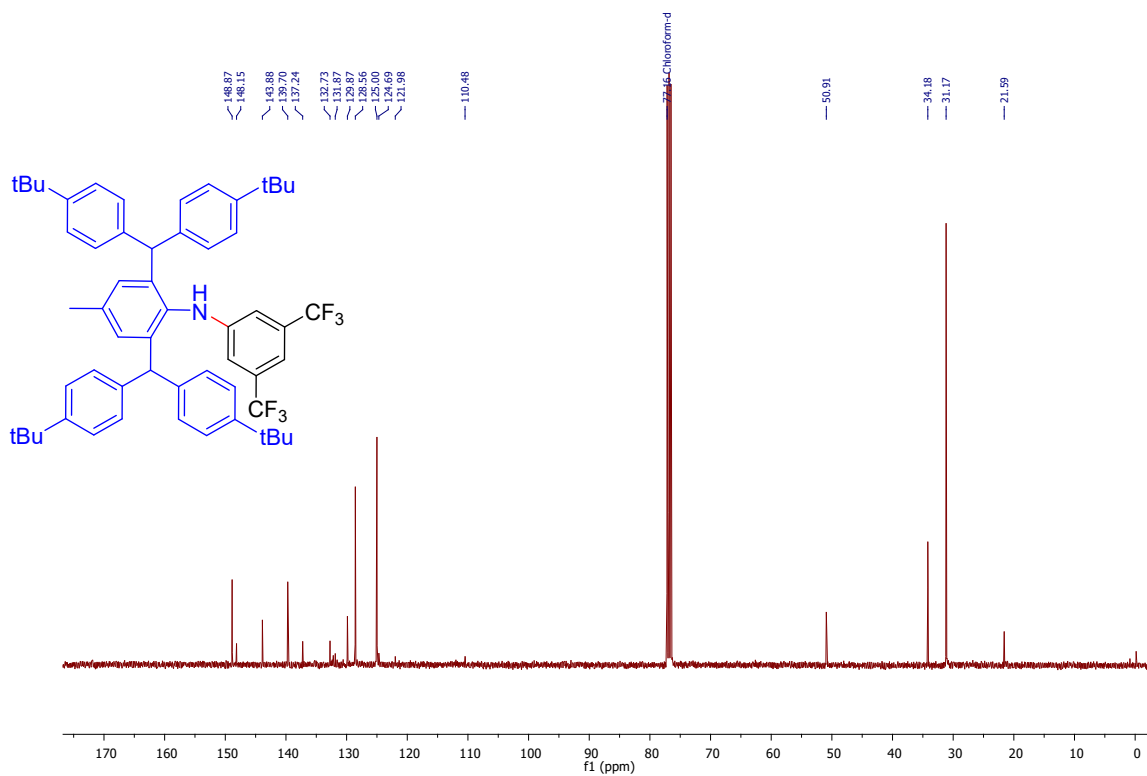

**$^{13}\text{C}\{^1\text{H}\}$  NMR of 4p**

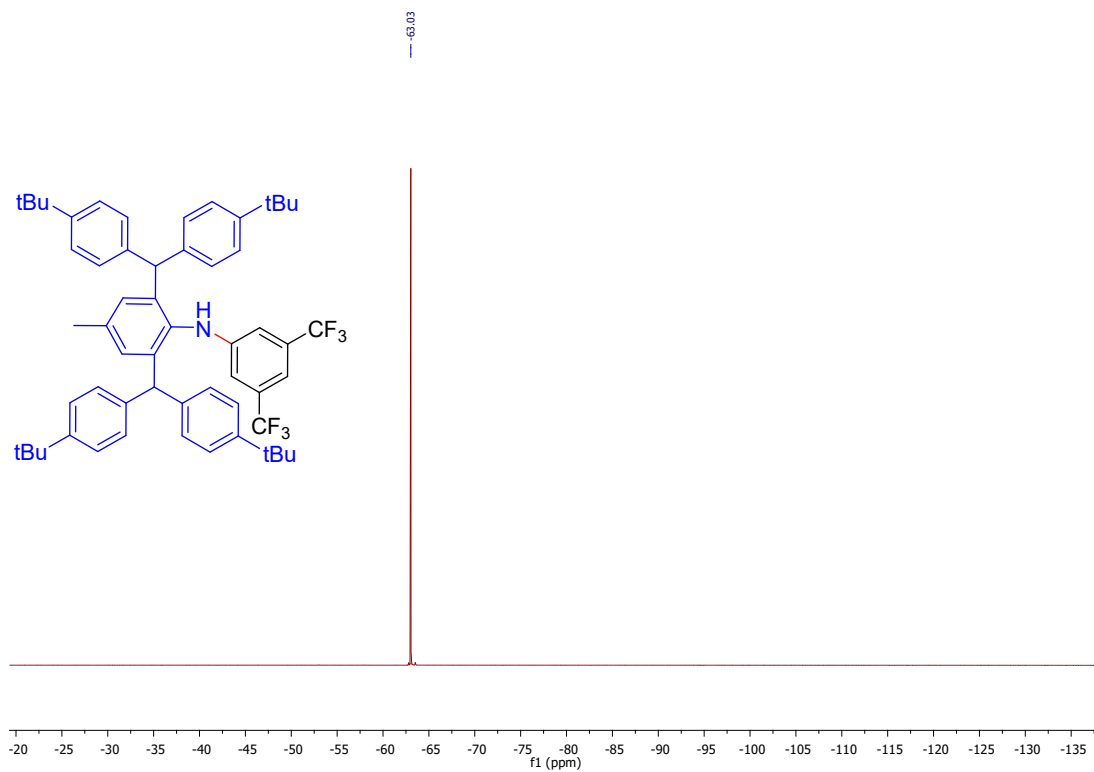

**$^{19}\text{F}\{^1\text{H}\}$  NMR of 4p**

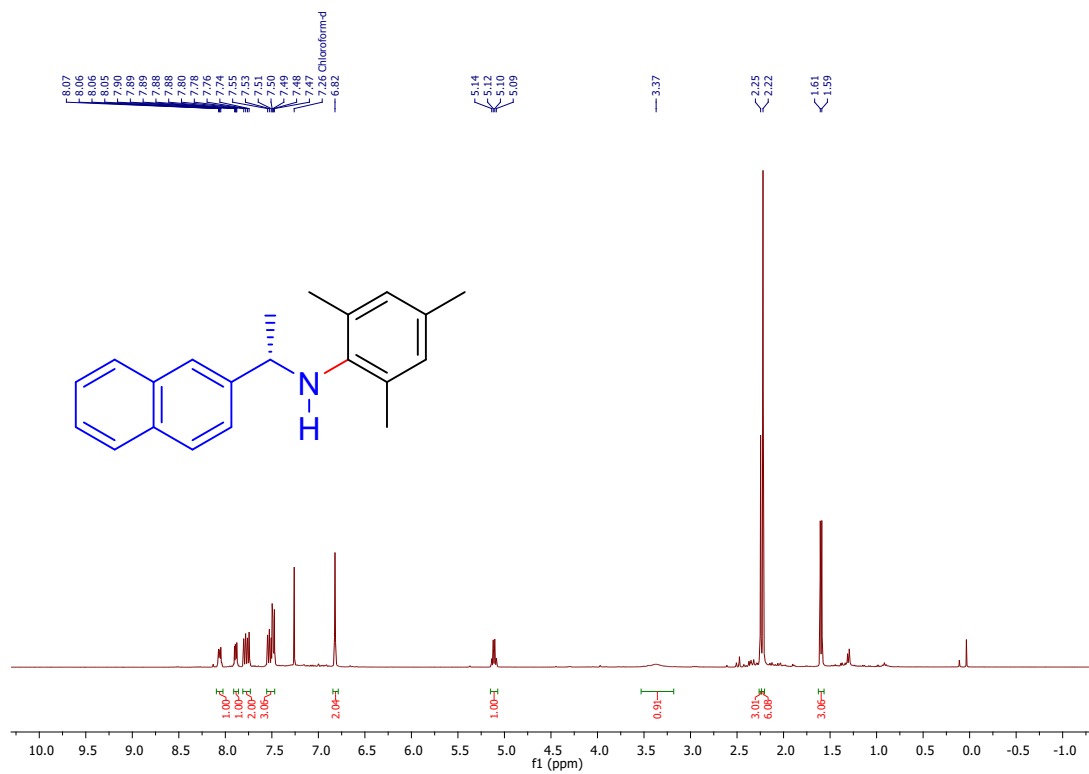

**<sup>1</sup>H NMR of 5a**

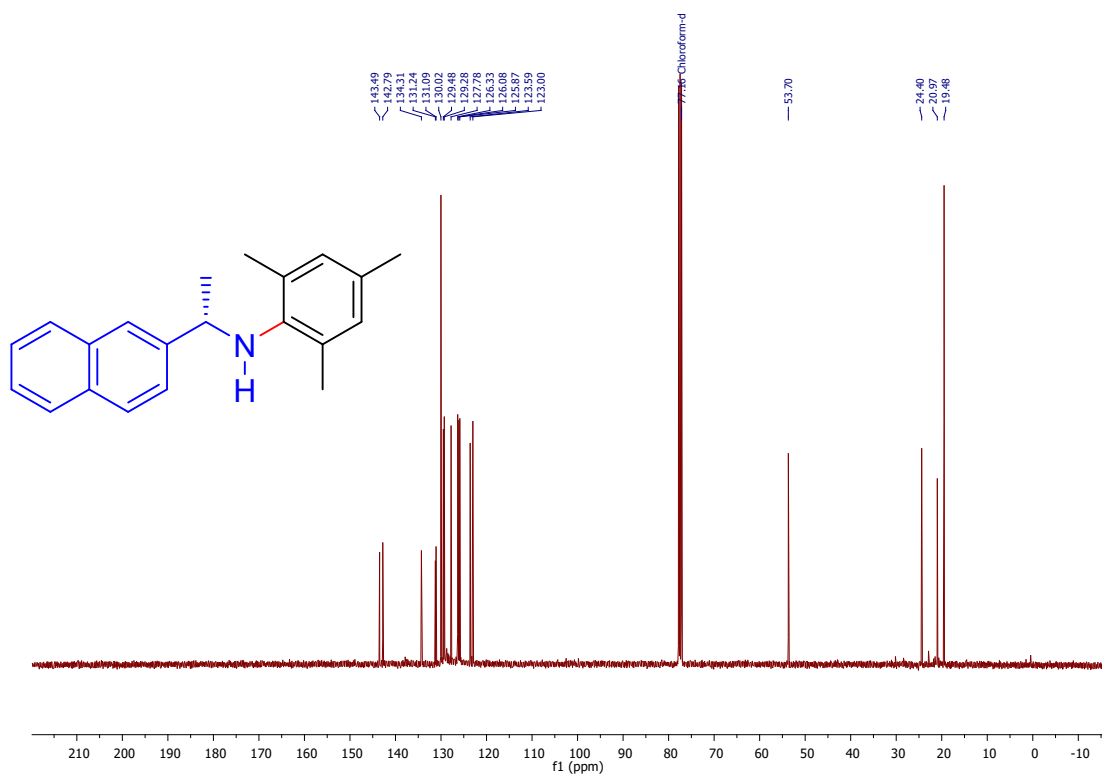

**<sup>13</sup>C{<sup>1</sup>H} NMR of 5a**

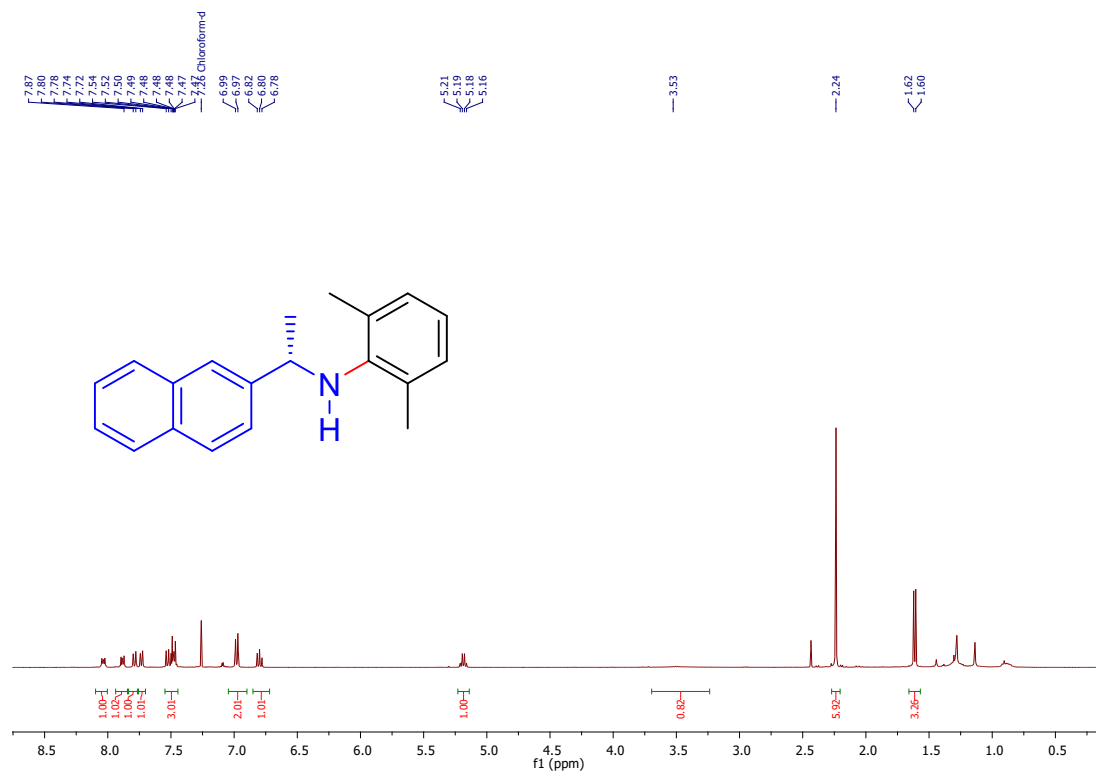

**<sup>1</sup>H NMR of 5b**

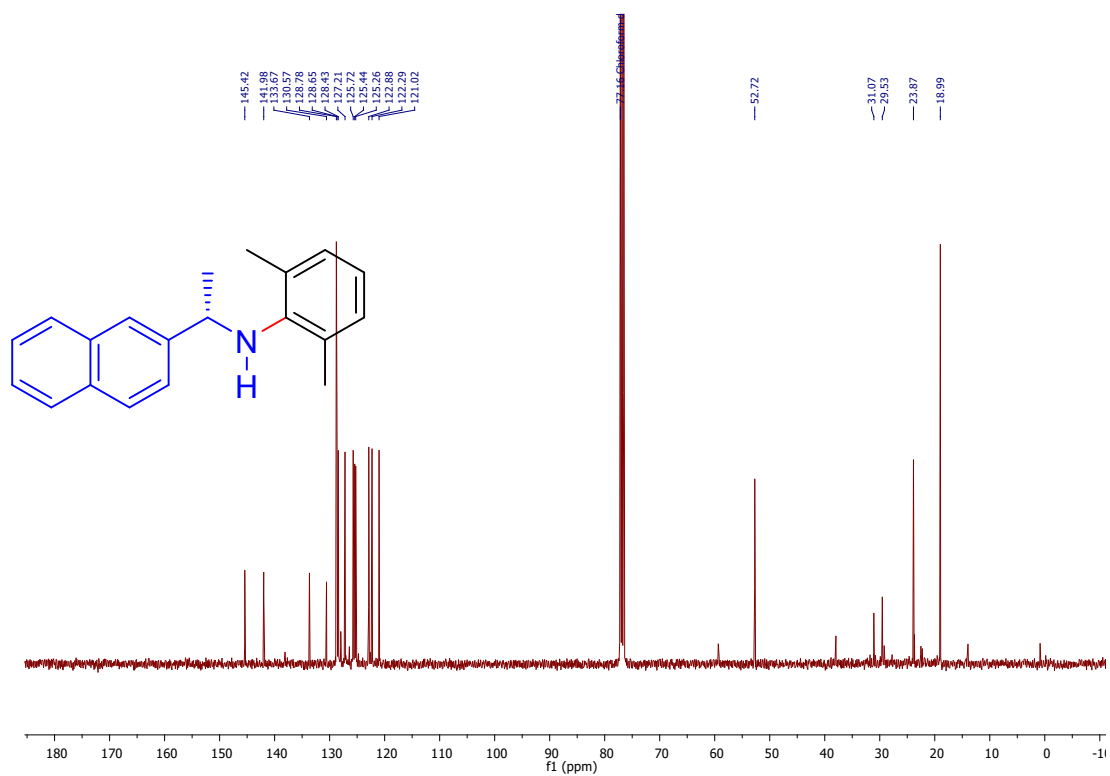

**<sup>13</sup>C{<sup>1</sup>H} NMR of 5b**

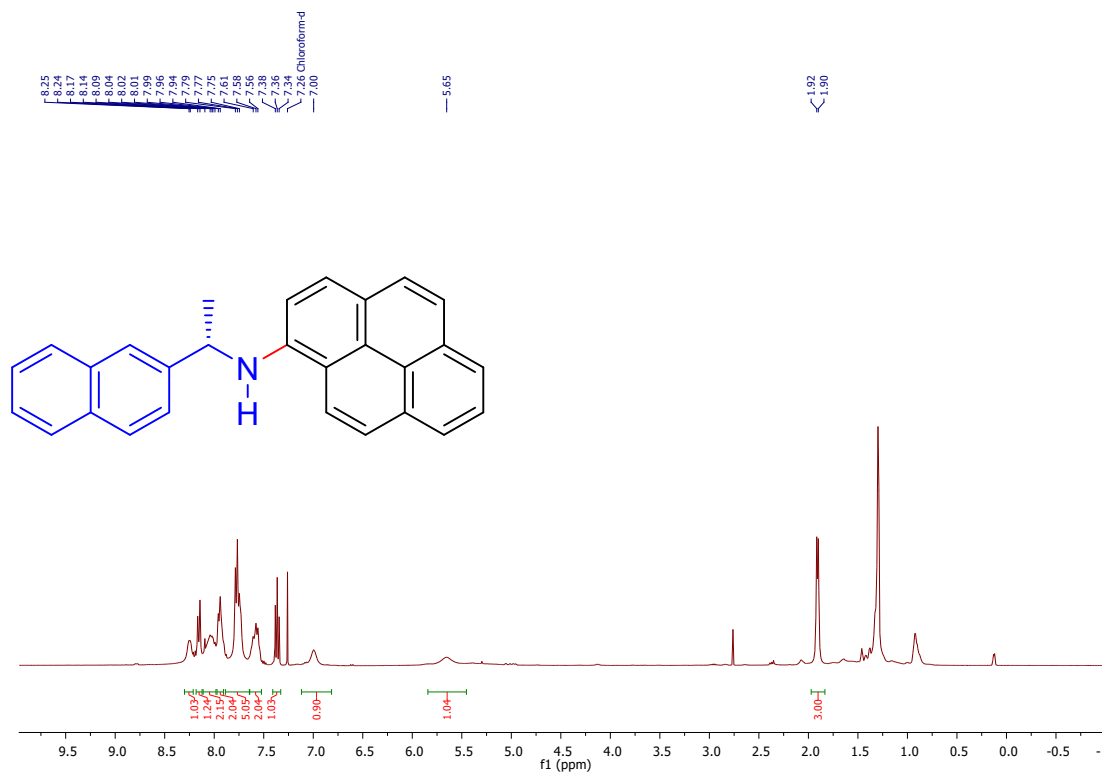

**<sup>1</sup>H NMR of 5c**

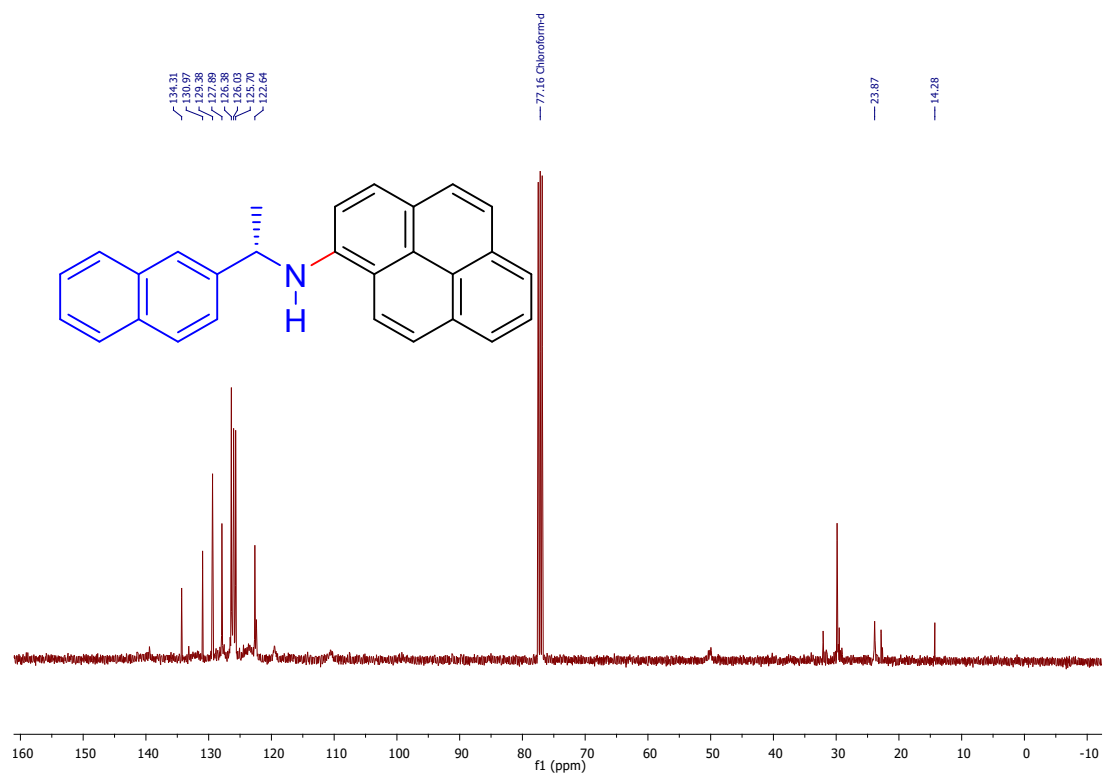

**<sup>13</sup>C{<sup>1</sup>H} NMR of 5c**

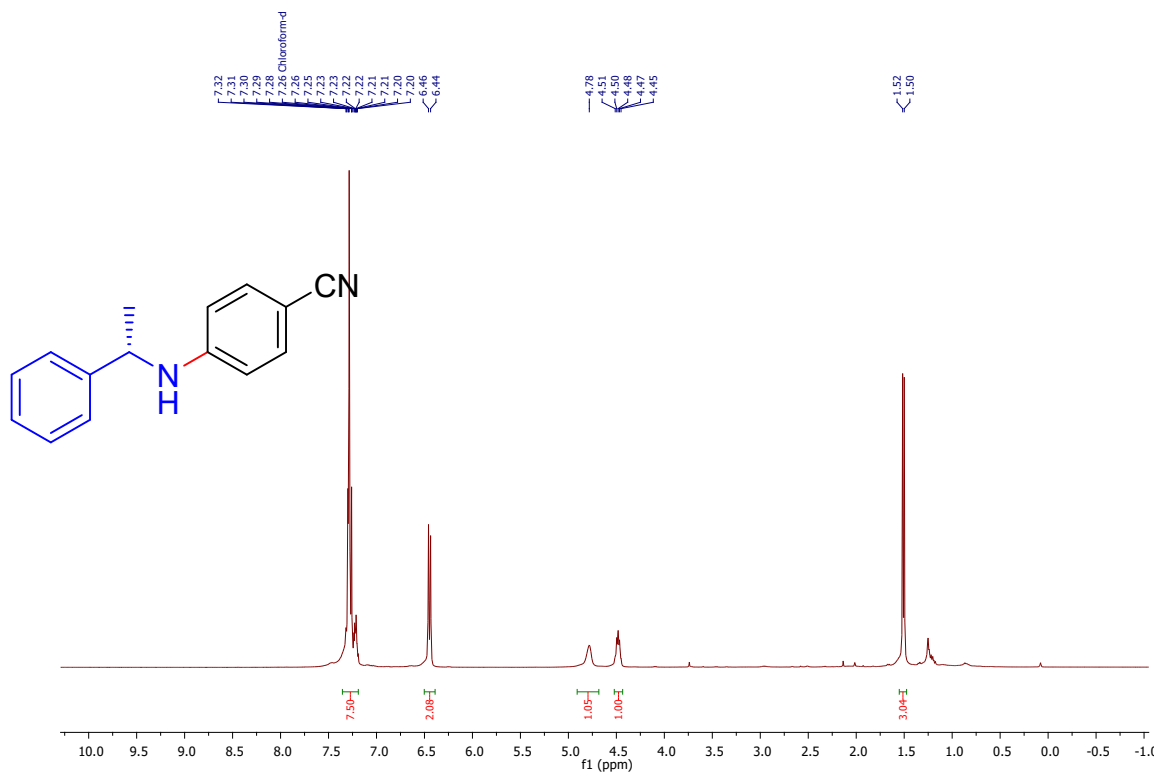

**<sup>1</sup>H NMR of 5d**

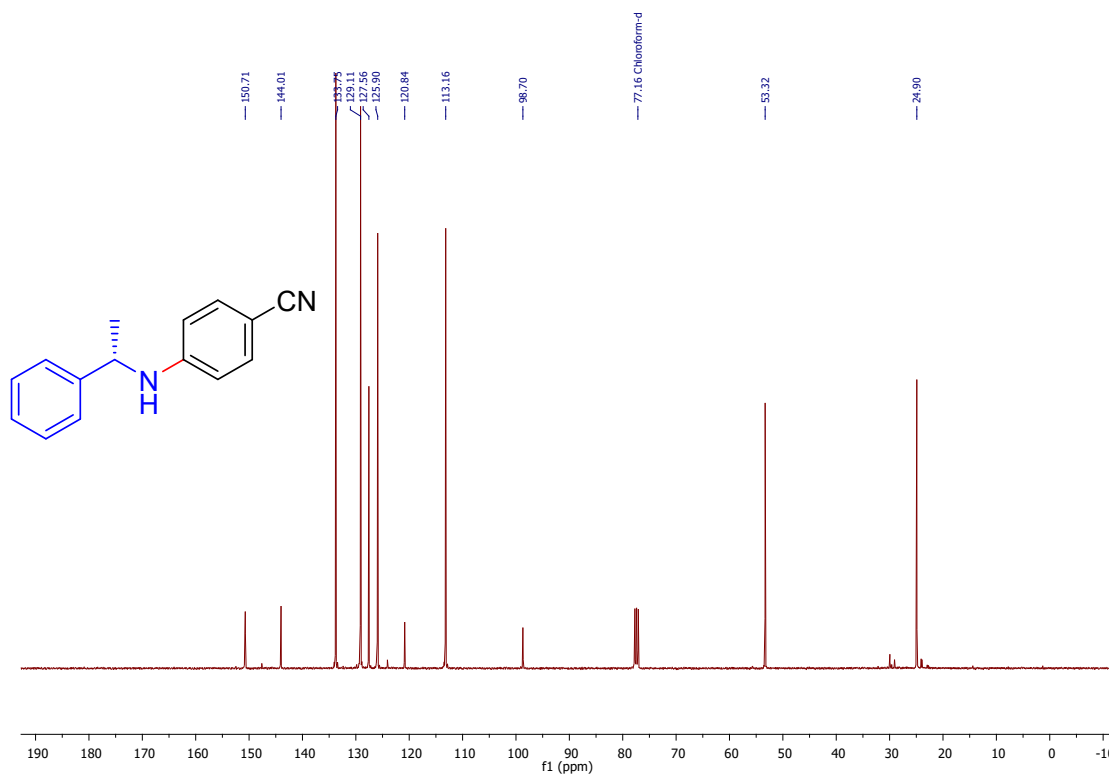

**<sup>13</sup>C{<sup>1</sup>H} NMR of 5d**

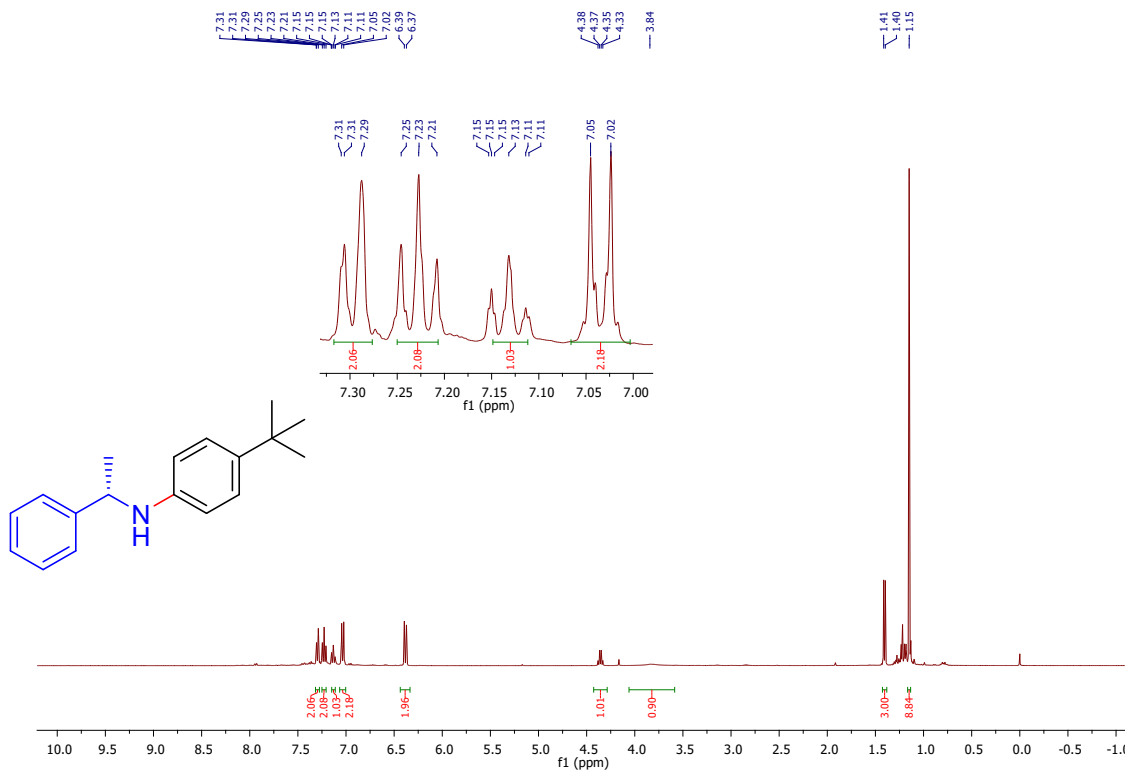

**<sup>1</sup>H NMR of 5e**

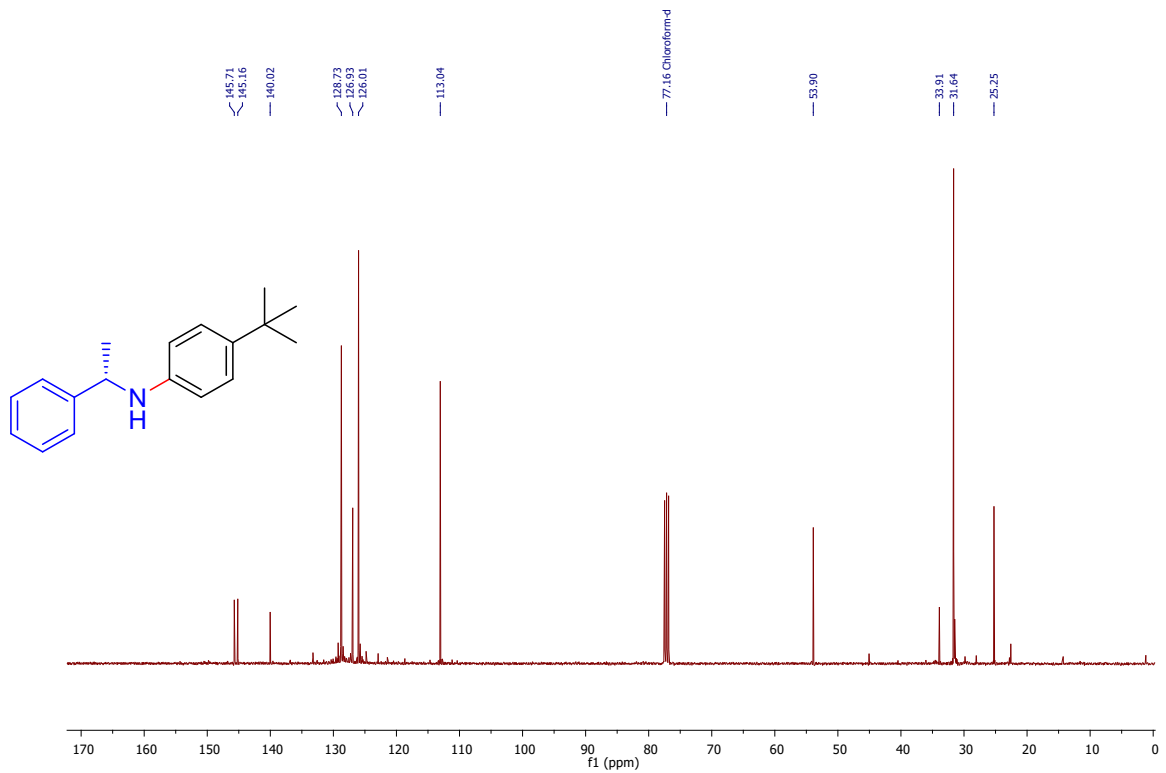

**<sup>13</sup>C{<sup>1</sup>H} NMR of 5e**

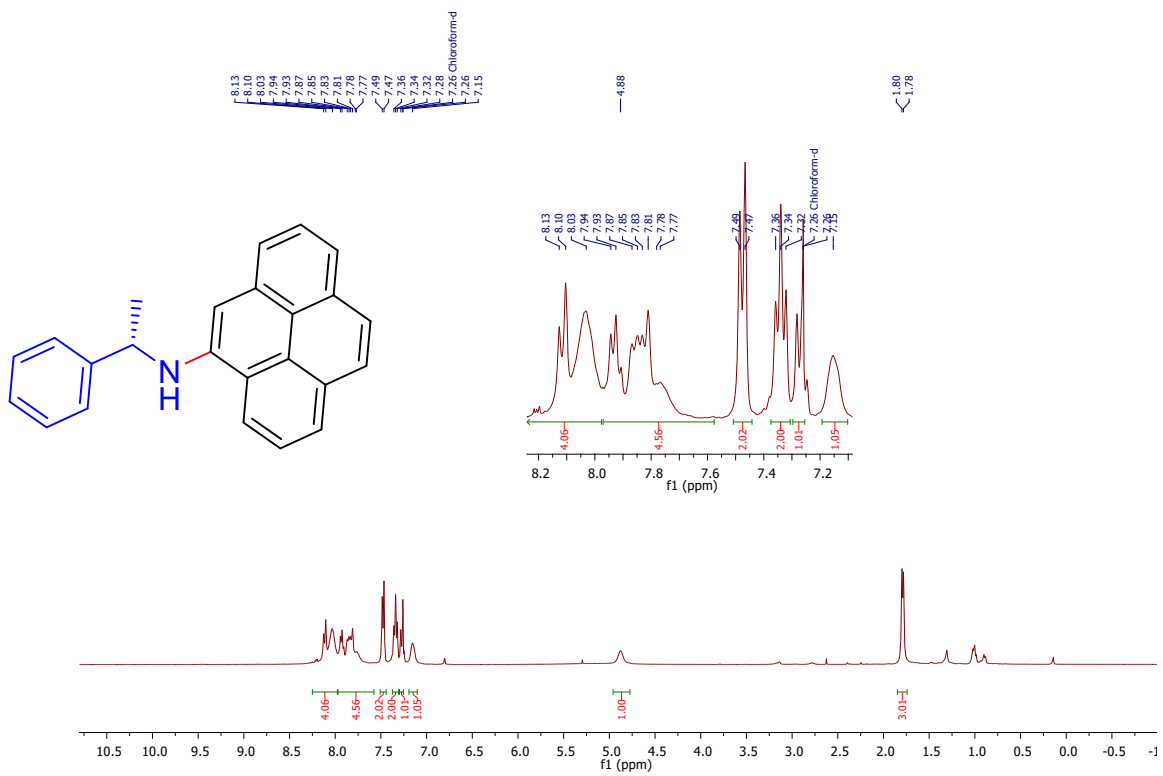

**<sup>1</sup>H NMR of 5f**

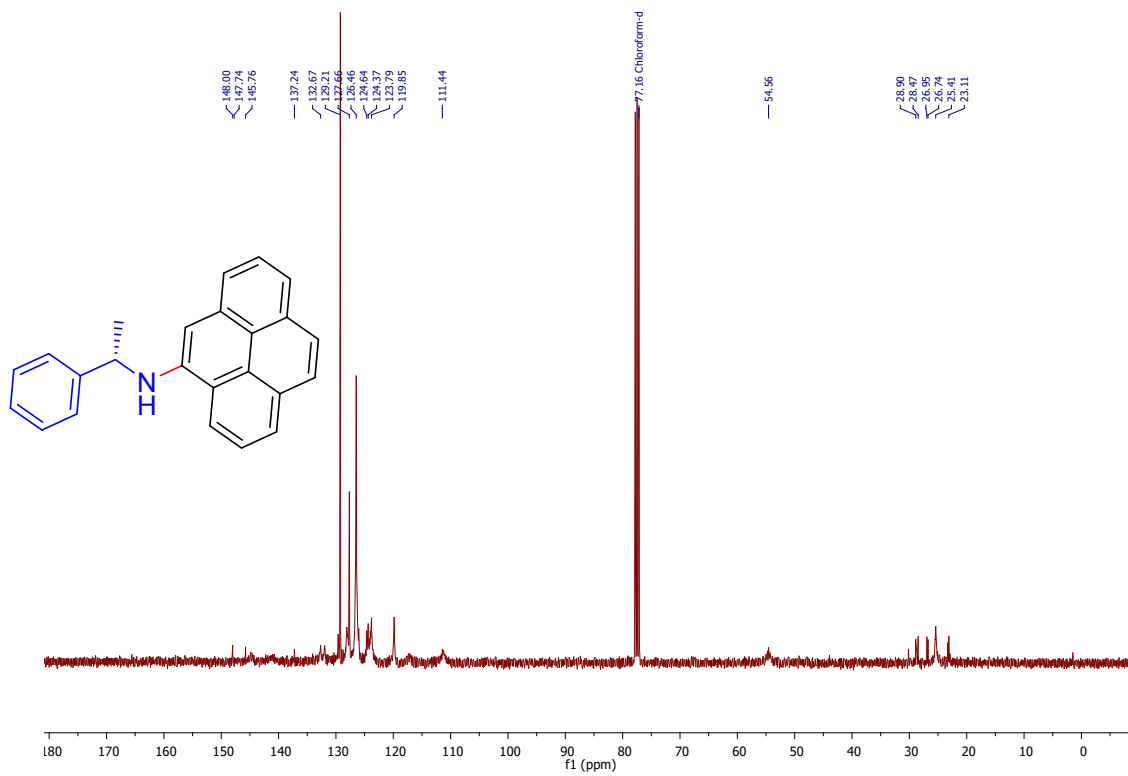

**<sup>13</sup>C{<sup>1</sup>H} NMR of 5f**



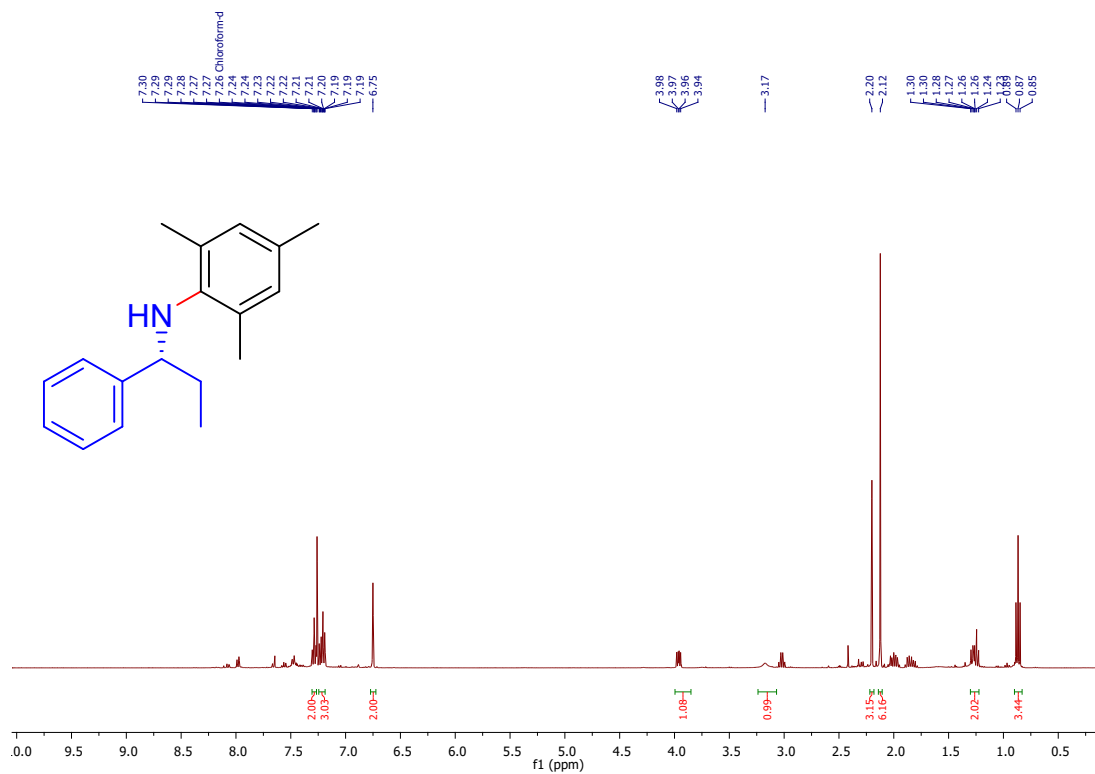

$^1\text{H NMR}$  of 5g

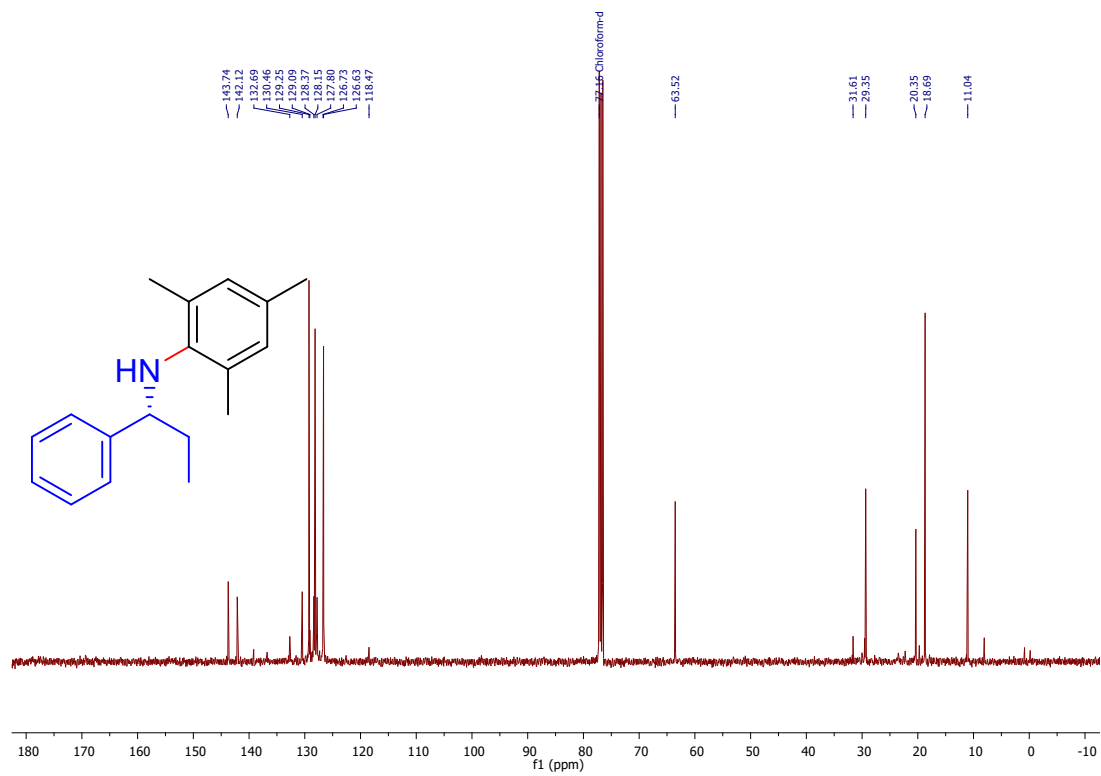

$^{13}\text{C}\{^1\text{H}\}$  NMR of 5g

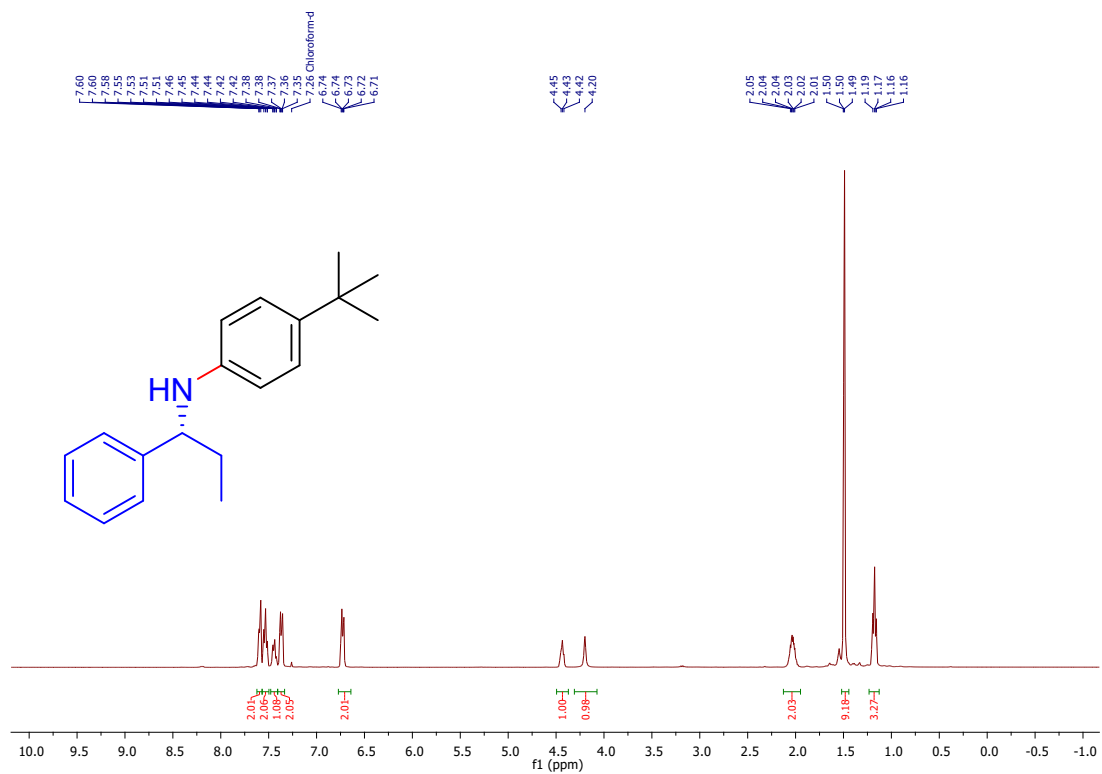

**<sup>1</sup>H NMR of 5h**

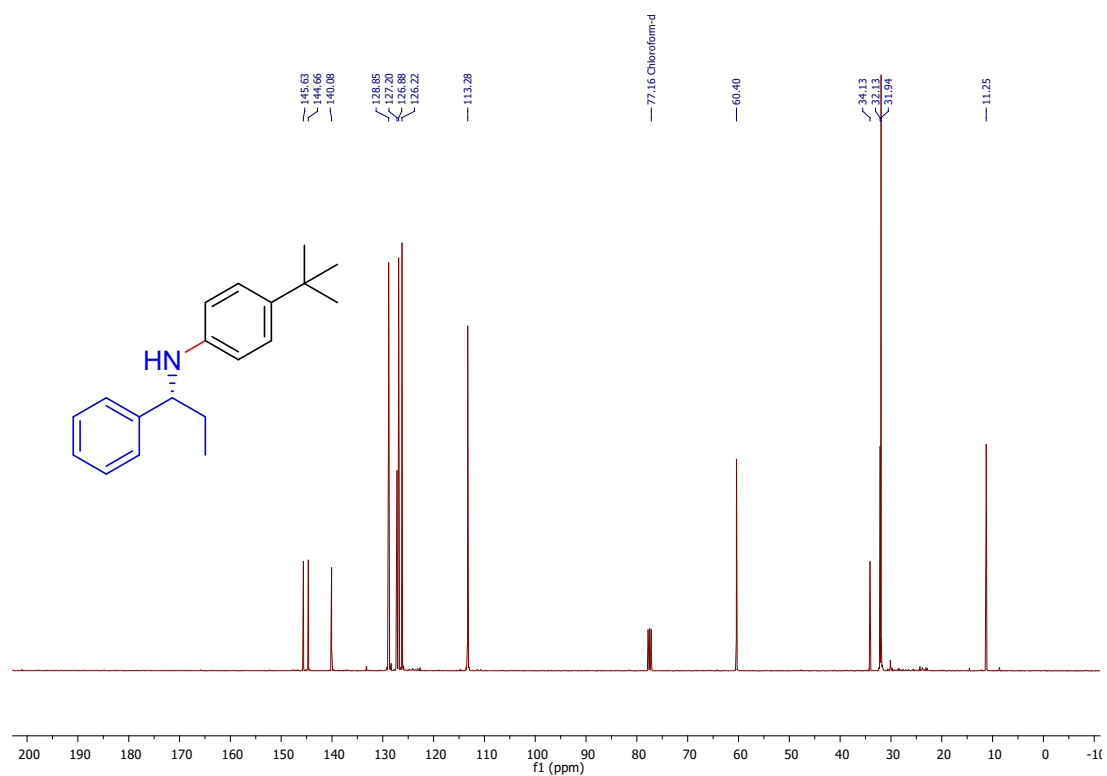

**<sup>13</sup>C{<sup>1</sup>H} NMR of 5h**

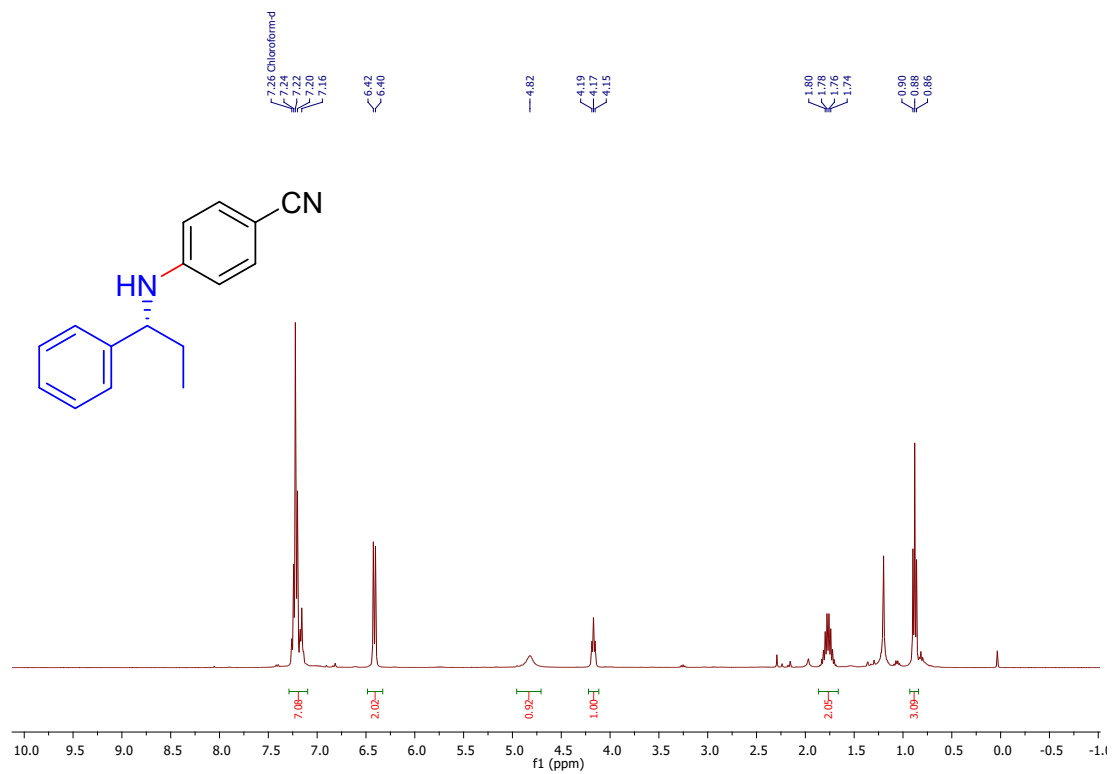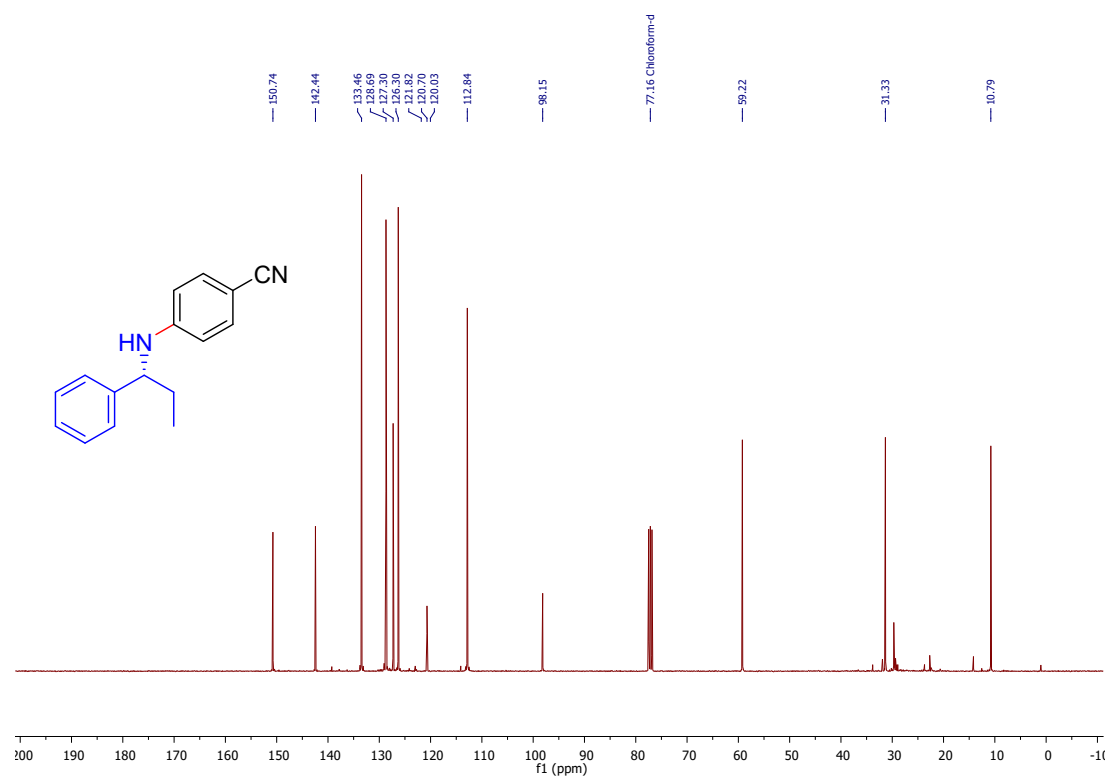

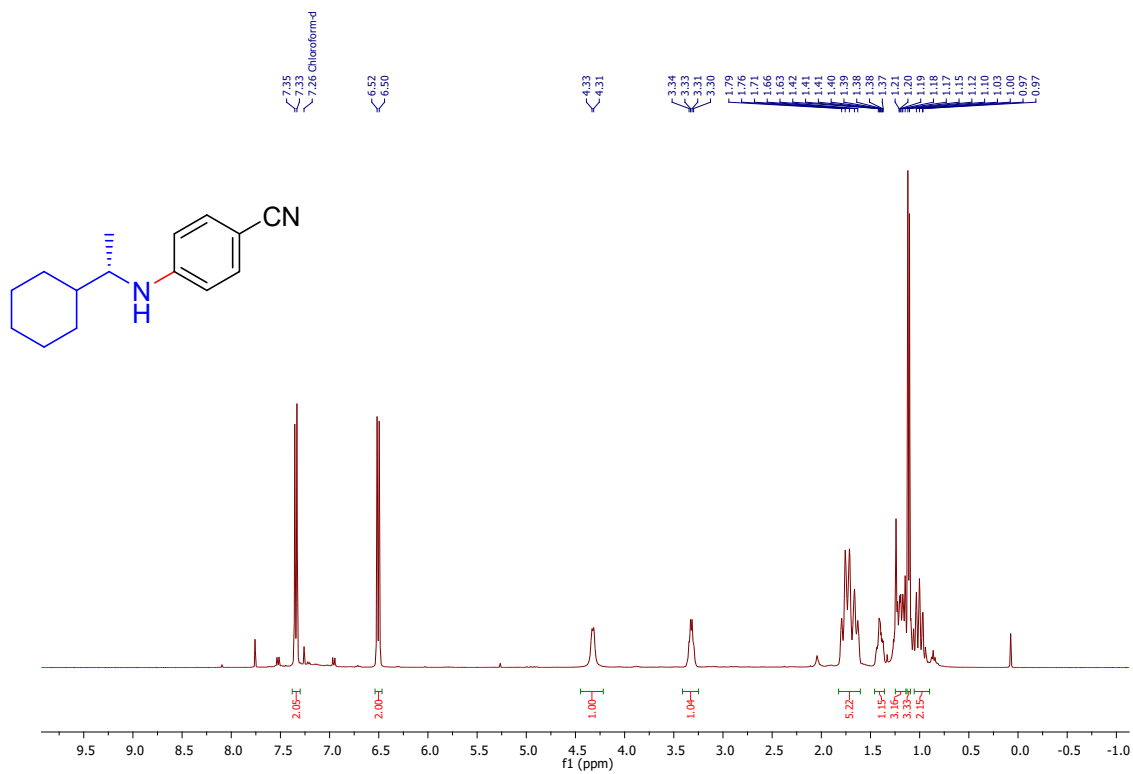

**<sup>1</sup>H NMR of 5j**

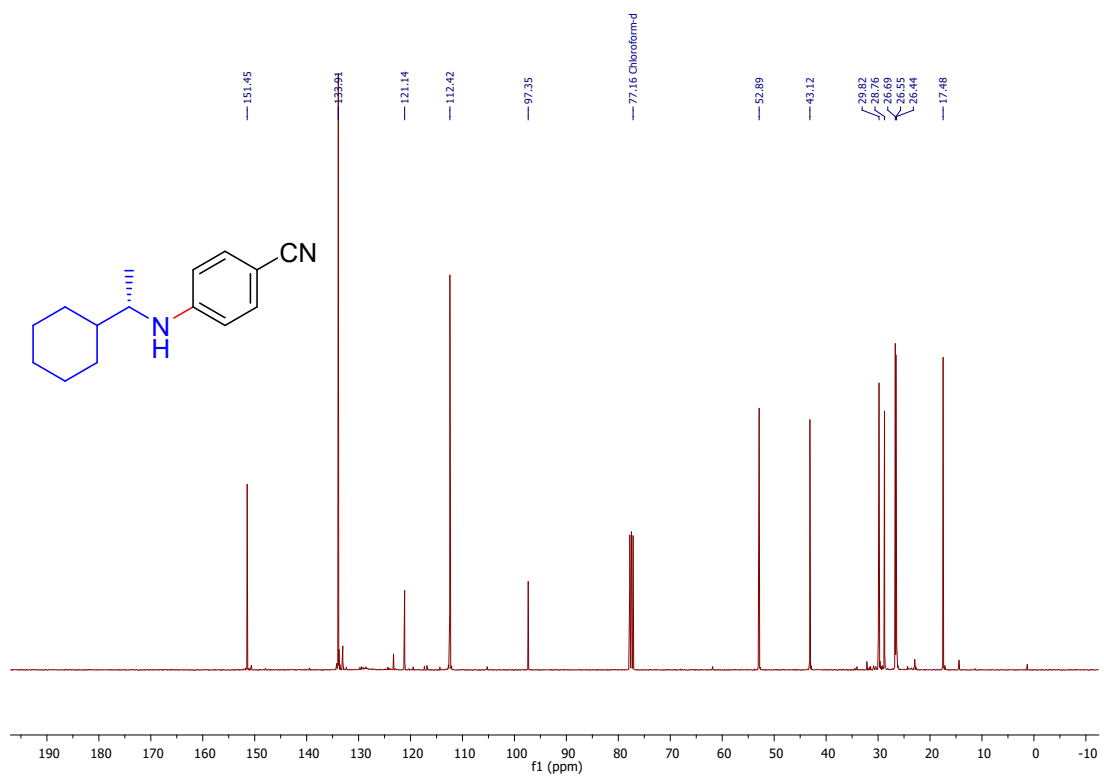

**<sup>13</sup>C{<sup>1</sup>H} NMR of 5j**

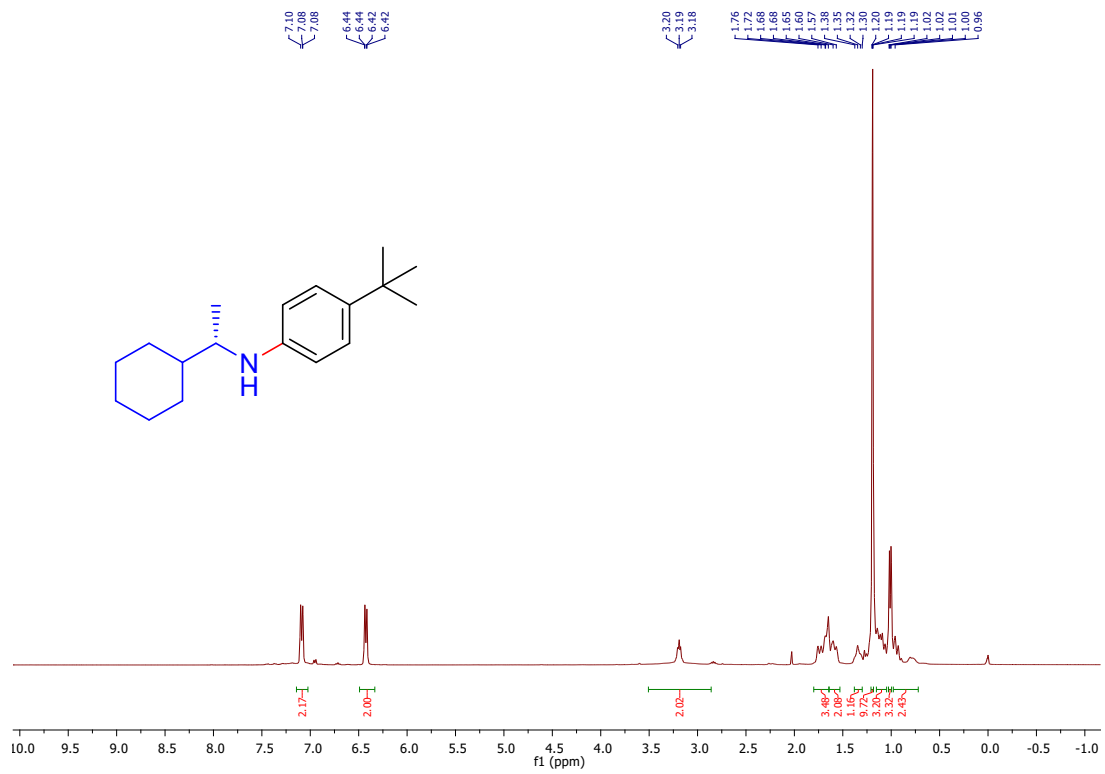

**<sup>1</sup>H NMR of 5k**

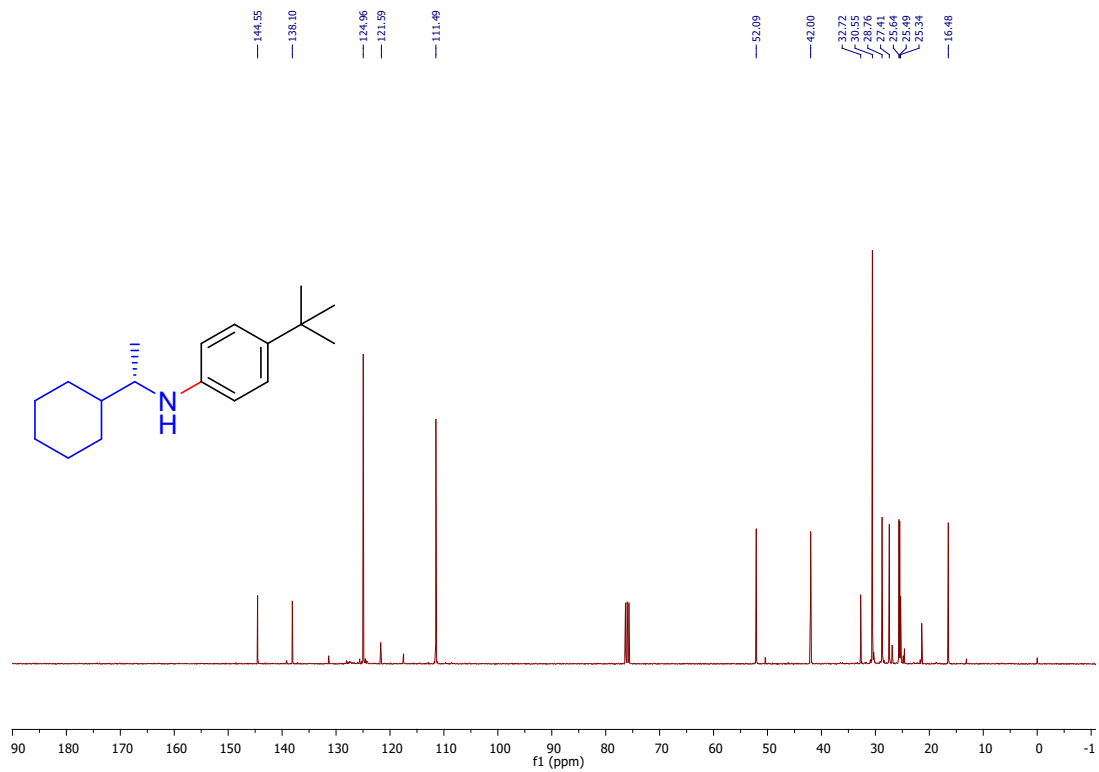

**<sup>13</sup>C{<sup>1</sup>H} NMR of 5k**

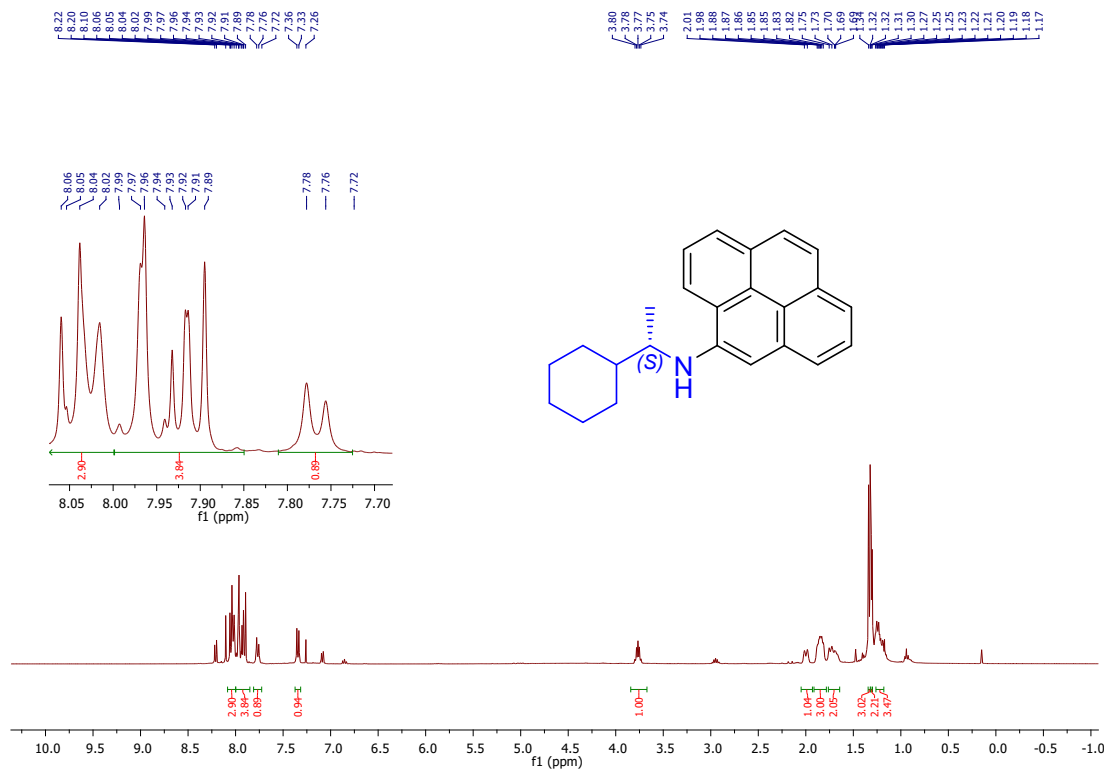

**<sup>1</sup>H NMR of 51**

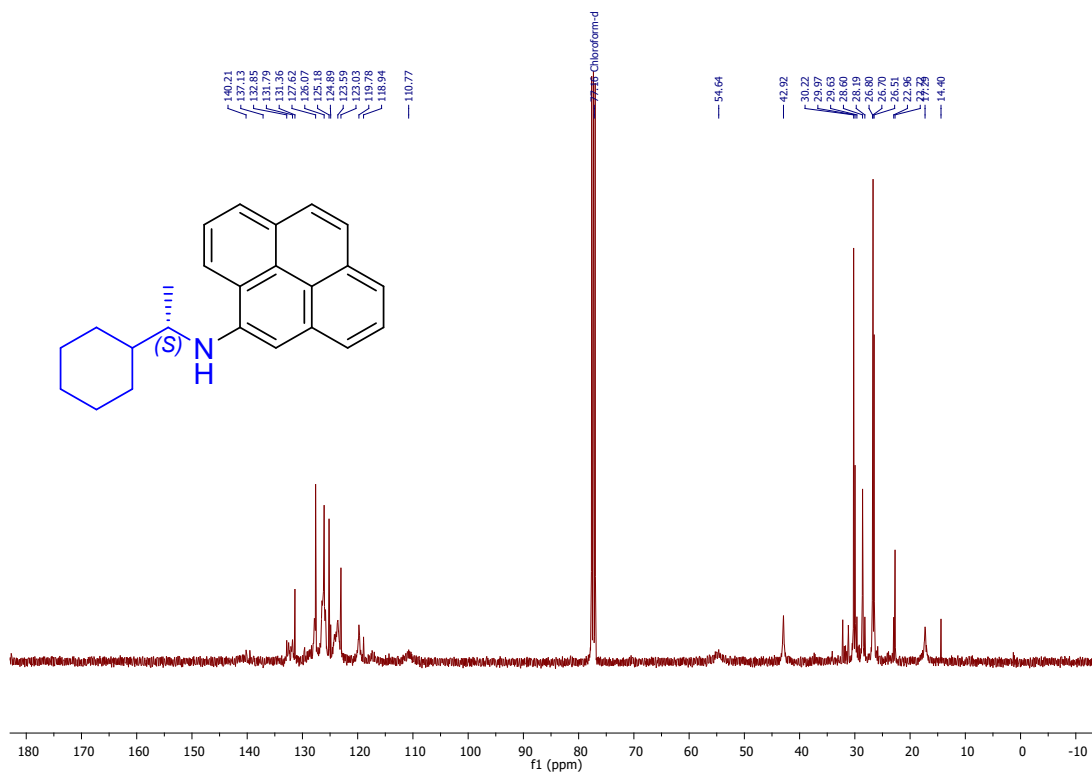

**<sup>13</sup>C{<sup>1</sup>H} NMR of 51**

## S8. HPLC Data

HPLC: Column: Chiral Pak AD-H (250 mm × 4.6 mm × 5 μm); Eluent: n-Hexane: Isopropyl Alcohol (Ratio specified with particular chromatogram); Gradient: Isocratic; Flow rate: 1ml/min; Injection volume: 10 μL; UV detection: 254 nm; Column temp.: ambient; Retention time may vary by ±1.0 min.

### I) Ligand effect on ee% with microwave method:

#### 1) IPr

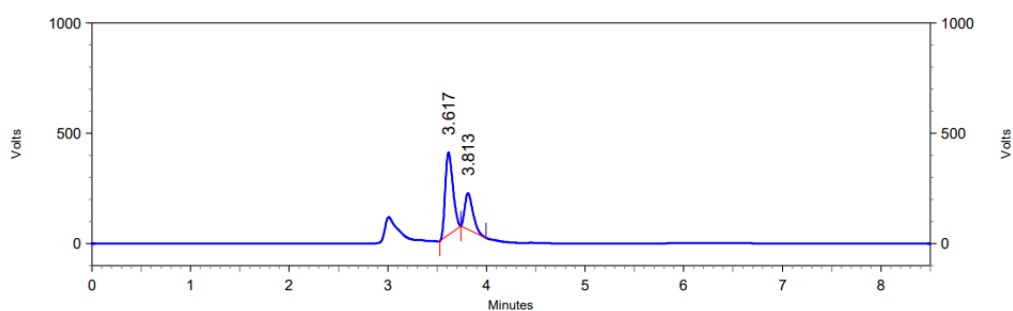

#### VWD: Signal A, 254 nm Results

| Retention Time | Area     | Area % |
|----------------|----------|--------|
| 3.617          | 33801649 | 68.17  |
| 3.813          | 15782514 | 31.83  |
| Totals         | 49584163 | 100.00 |

#### 2) DPEPhos

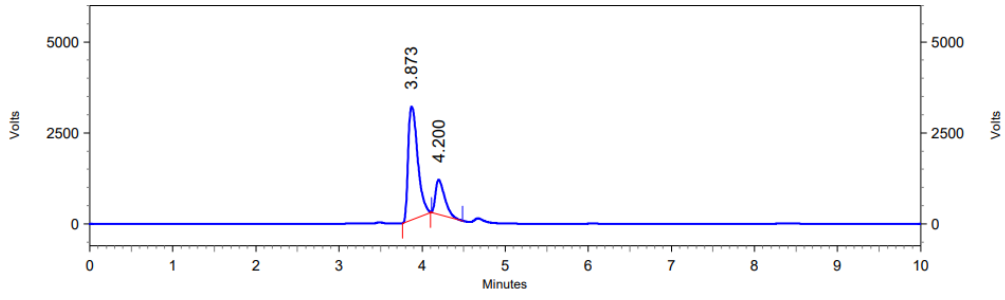

VWD: Signal A, 254 nm

Results

| Retention Time | Area      | Area % |
|----------------|-----------|--------|
| 3.873          | 415727416 | 76.91  |
| 4.200          | 124791925 | 23.09  |

|        |           |        |
|--------|-----------|--------|
| Totals | 540519341 | 100.00 |
|--------|-----------|--------|

### 3) L1

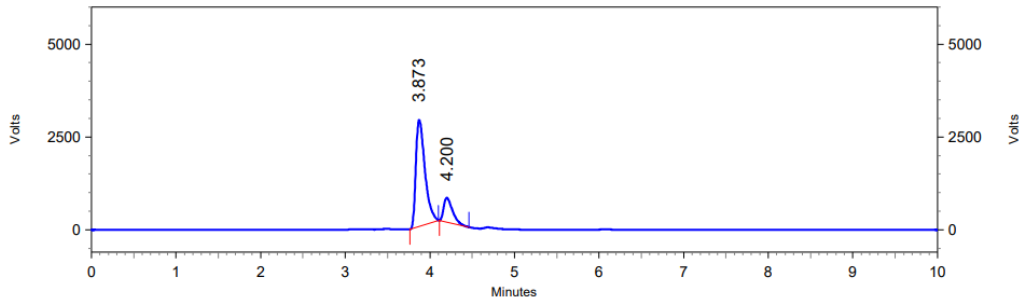

VWD: Signal A, 254 nm

Results

| Retention Time | Area      | Area % |
|----------------|-----------|--------|
| 3.873          | 359243258 | 81.74  |
| 4.200          | 80226176  | 18.26  |

|        |           |        |
|--------|-----------|--------|
| Totals | 439469434 | 100.00 |
|--------|-----------|--------|

### 4) L2



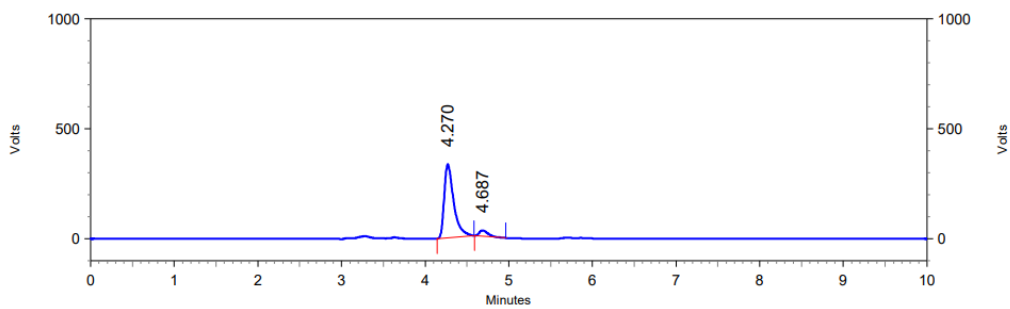

VWD: Signal A, 254 nm Results

| Retention Time | Area     | Area % |
|----------------|----------|--------|
| 4.270          | 44134846 | 93.04  |
| 4.687          | 3300156  | 6.96   |
| Totals         | 47435002 | 100.00 |

### 5) PNP(DIPP)

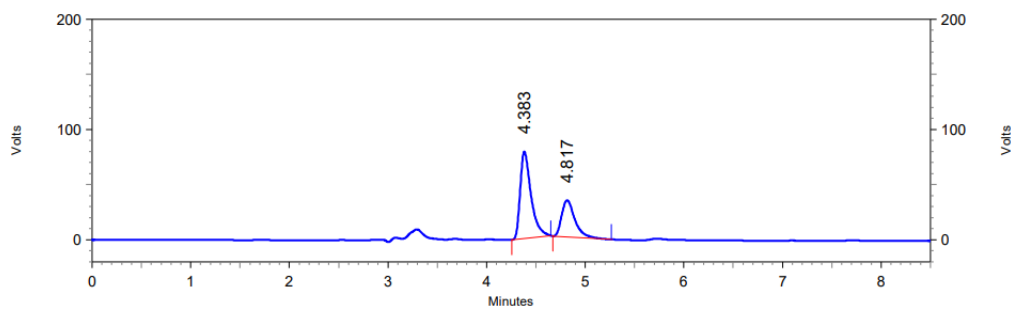

VWD: Signal A, 254 nm Results

| Retention Time | Area     | Area % |
|----------------|----------|--------|
| 4.383          | 10139694 | 66.13  |
| 4.817          | 5193883  | 33.87  |
| Totals         | 15333577 | 100.00 |

## II) HPLC chromatogram for substrates 5a – 5l

5a)

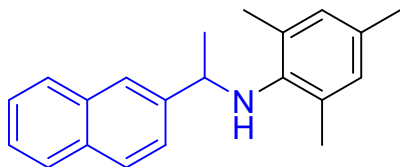

Racemic

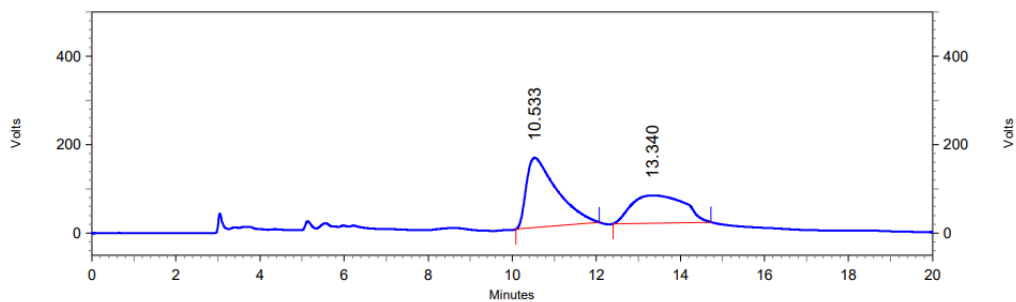

### VWD: Signal A, 254 nm Results

| Retention Time | Area      | Area % |
|----------------|-----------|--------|
| 10.533         | 134259012 | 59.44  |
| 13.340         | 91602257  | 40.56  |

|        |           |        |
|--------|-----------|--------|
| Totals | 225861269 | 100.00 |
|--------|-----------|--------|

L1

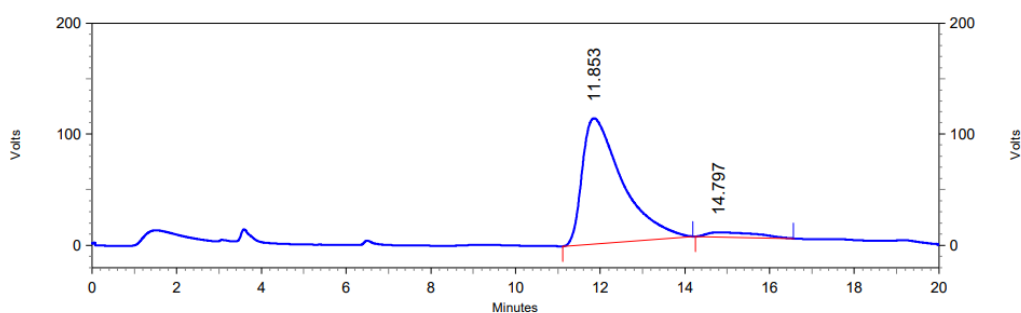

### VWD: Signal A, 254 nm Results

| Retention Time | Area      | Area % |
|----------------|-----------|--------|
| 11.853         | 123838773 | 95.42  |
| 14.797         | 5945854   | 4.58   |

|        |           |        |
|--------|-----------|--------|
| Totals | 129784627 | 100.00 |
|--------|-----------|--------|

L2

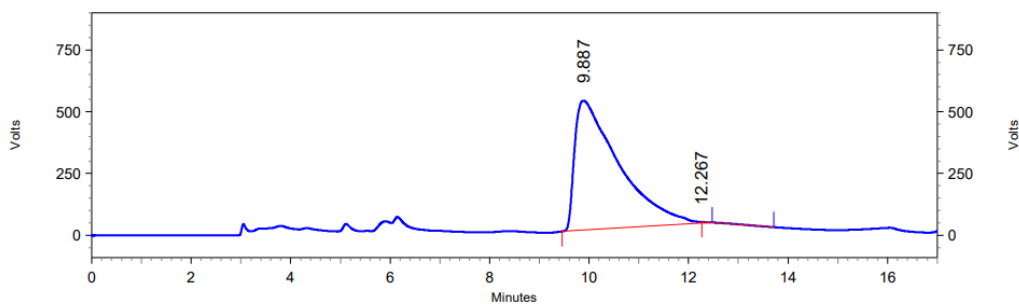

VWD: Signal A,  
254 nm Results

| Retention Time | Area      | Area % | Height  | Height % |
|----------------|-----------|--------|---------|----------|
| 9.887          | 541686123 | 99.78  | 8793630 | 100.00   |
| 12.267         | 1200209   | 0.22   | 0       | 0.00     |
| Totals         | 542886332 | 100.00 | 8793630 | 100.00   |

5b)

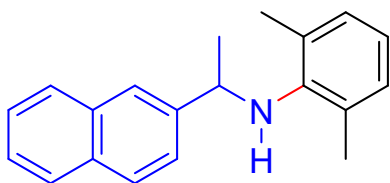

Racemic

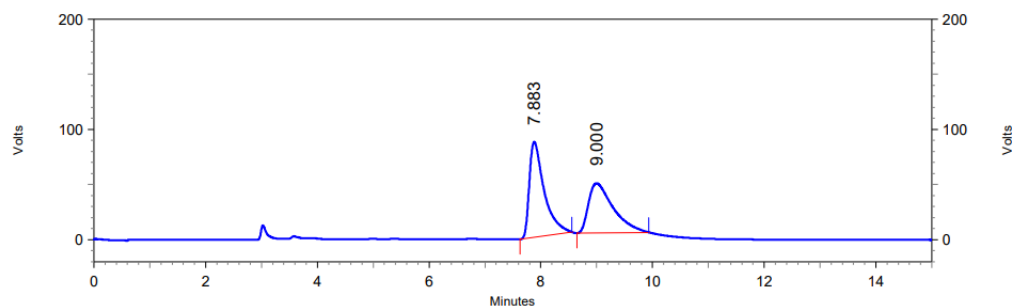

VWD: Signal A, 254 nm Results

| Retention Time | Area     | Area % |
|----------------|----------|--------|
| 7.883          | 26852383 | 53.69  |
| 9.000          | 23161041 | 46.31  |
| Totals         | 50013424 | 100.00 |

**L1**

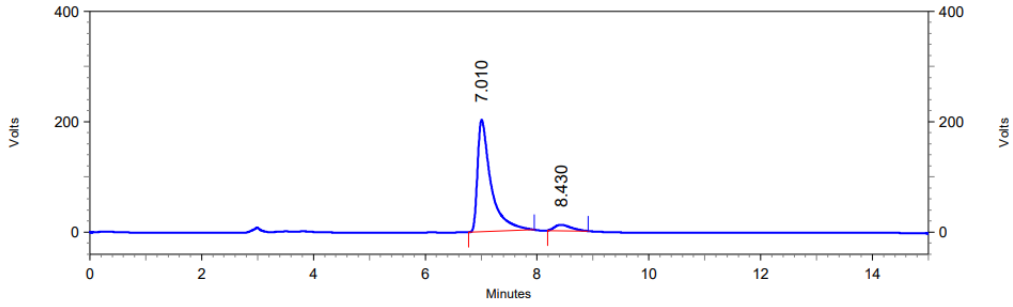

**VWD: Signal A, 254 nm Results**

| Retention Time | Area            | Area %        |
|----------------|-----------------|---------------|
| 7.010          | 56931215        | 93.99         |
| 8.430          | 3637223         | 6.01          |
| <b>Totals</b>  | <b>60568438</b> | <b>100.00</b> |

**L2**

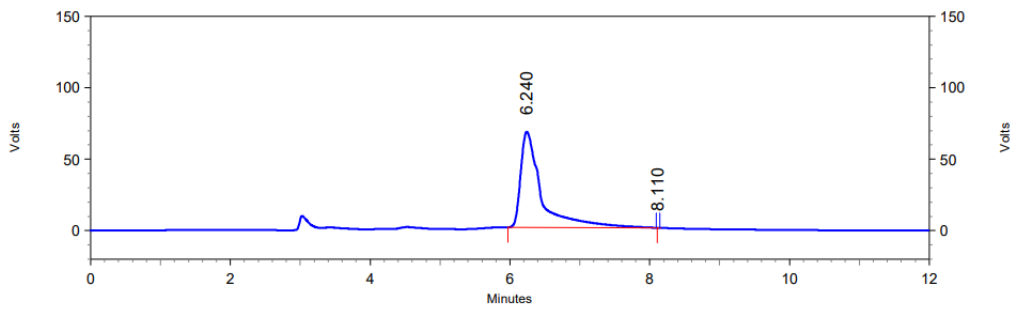

**VWD: Signal A, 254 nm Results**

| Retention Time | Area            | Area %        |
|----------------|-----------------|---------------|
| 6.240          | 23075542        | 100.00        |
| 8.110          | 5               | 0.00          |
| <b>Totals</b>  | <b>23075547</b> | <b>100.00</b> |

5c)

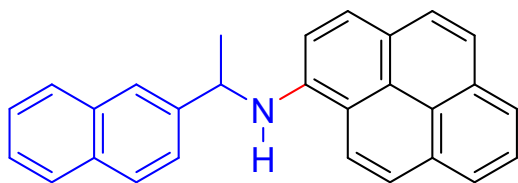

Racemic

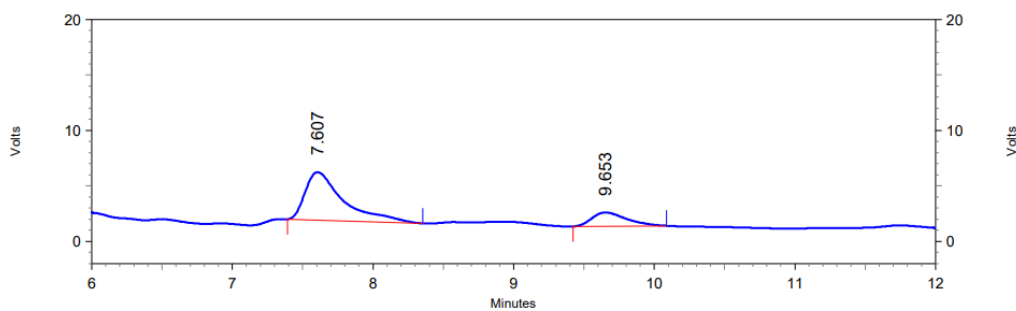

VWD: Signal A, 254 nm Results

| Retention Time | Area    | Area % |
|----------------|---------|--------|
| 7.607          | 1376954 | 79.61  |
| 9.653          | 352586  | 20.39  |
| Totals         | 1729540 | 100.00 |

L1

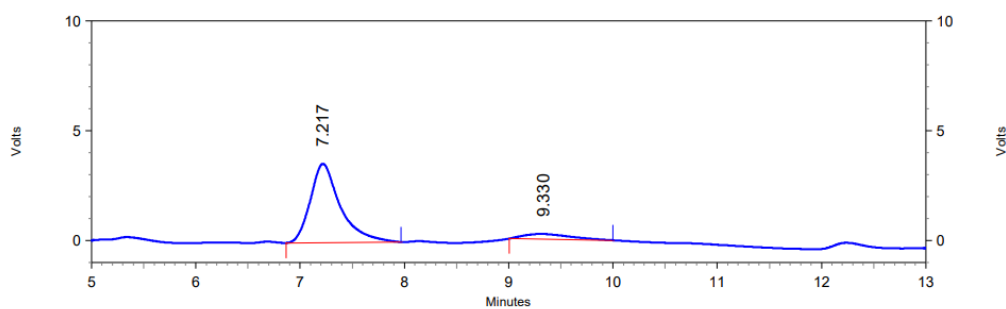

VWD: Signal A, 254 nm Results

| Retention Time | Area    | Area % |
|----------------|---------|--------|
| 7.217          | 1202282 | 90.65  |
| 9.330          | 124017  | 9.35   |
| Totals         | 1326299 | 100.00 |

L2

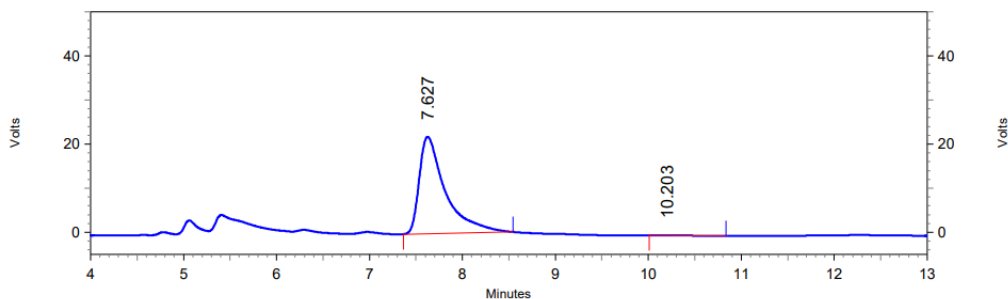

**VWD: Signal A, 254 nm Results**

| Retention Time | Area    | Area % |
|----------------|---------|--------|
| 7.627          | 7193883 | 99.72  |
| 10.203         | 19848   | 0.28   |
| Totals         | 7213731 | 100.00 |

5d)

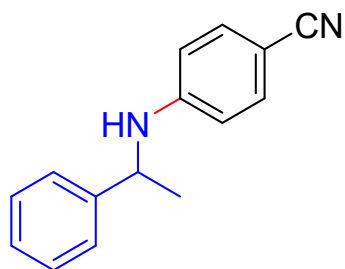

Racemic

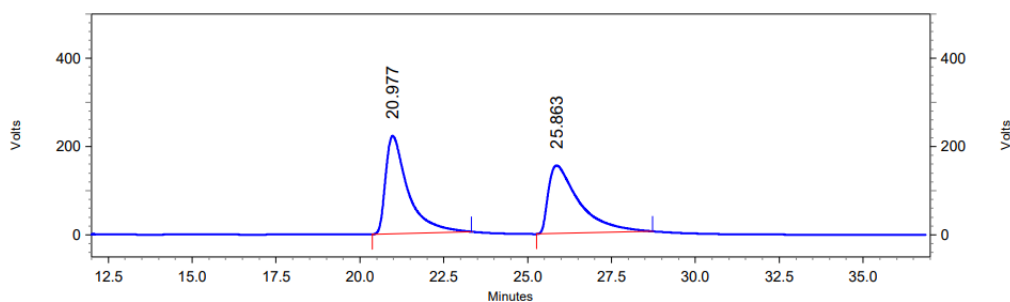

**VWD: Signal A, 254 nm Results**

| Retention Time | Area      | Area % |
|----------------|-----------|--------|
| 20.977         | 172649448 | 51.05  |
| 25.863         | 165572386 | 48.95  |
| Totals         | 338221834 | 100.00 |

L1

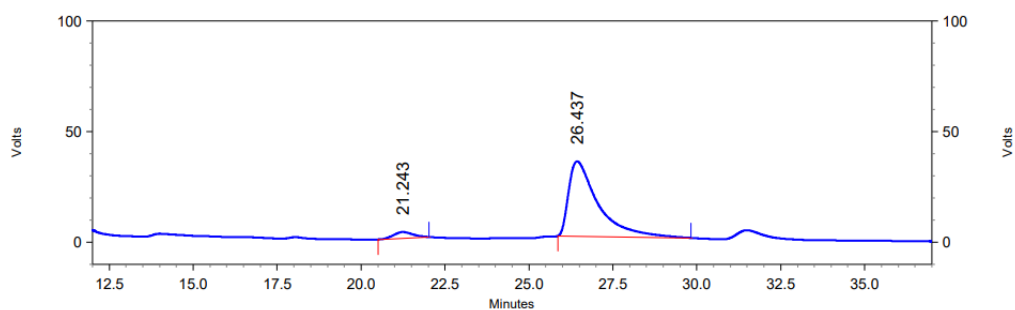

**VWD: Signal A, 254 nm Results**

| Retention Time | Area            | Area %        |
|----------------|-----------------|---------------|
| 21.243         | 1886988         | 5.16          |
| 26.437         | 34689578        | 94.84         |
| <b>Totals</b>  | <b>36576566</b> | <b>100.00</b> |

L2

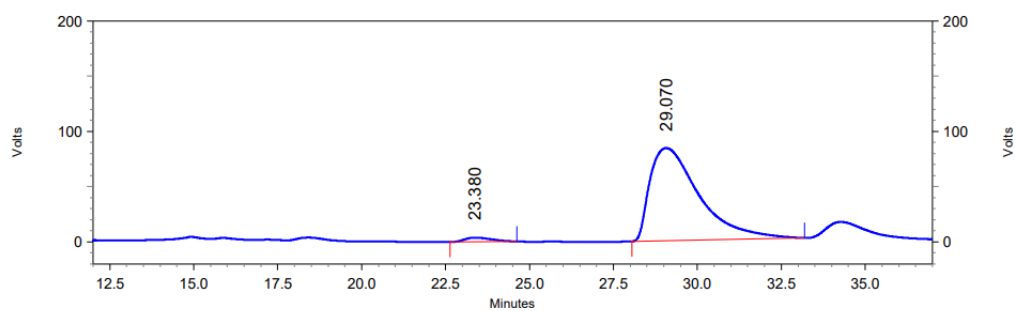

**VWD: Signal A, 254 nm Results**

| Retention Time | Area             | Area %        |
|----------------|------------------|---------------|
| 23.380         | 3500052          | 2.37          |
| 29.070         | 143990419        | 97.63         |
| <b>Totals</b>  | <b>147490471</b> | <b>100.00</b> |

5e)

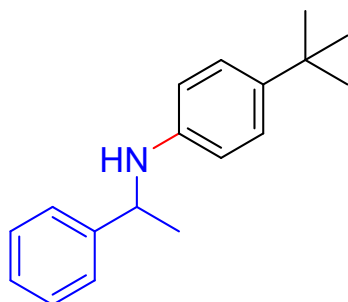

## Racemic

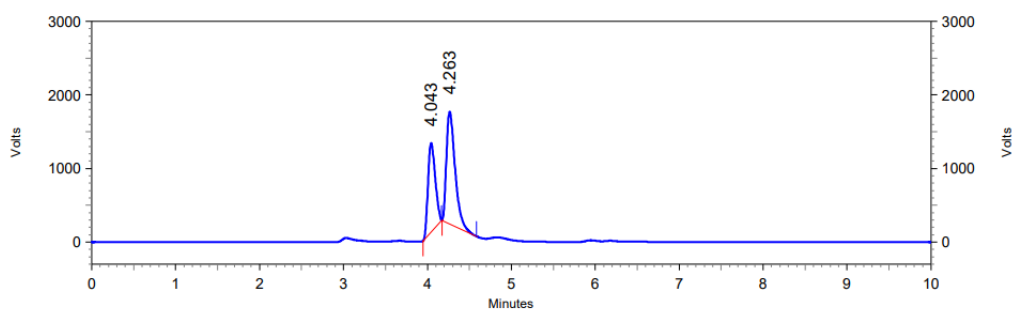

### VWD: Signal A, 254 nm Results

| Retention Time | Area             | Area %        |
|----------------|------------------|---------------|
| 4.043          | 121049064        | 39.65         |
| 4.263          | 184266536        | 60.35         |
| <b>Totals</b>  | <b>305315600</b> | <b>100.00</b> |

## L1

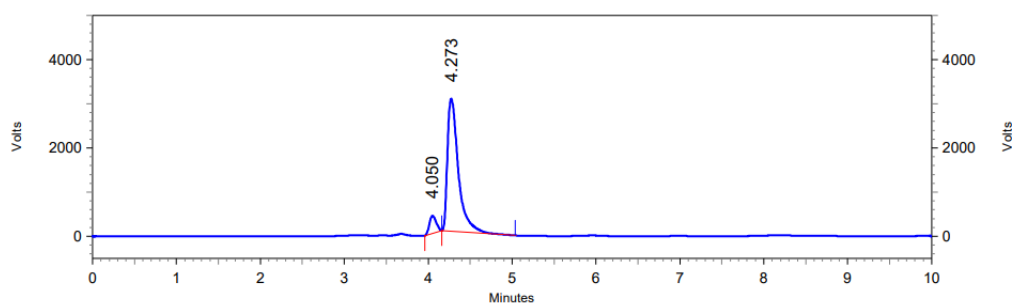

### VWD: Signal A, 254 nm Results

| Retention Time | Area             | Area %        |
|----------------|------------------|---------------|
| 4.050          | 37782763         | 7.64          |
| 4.273          | 456791225        | 92.36         |
| <b>Totals</b>  | <b>494573988</b> | <b>100.00</b> |

## L2



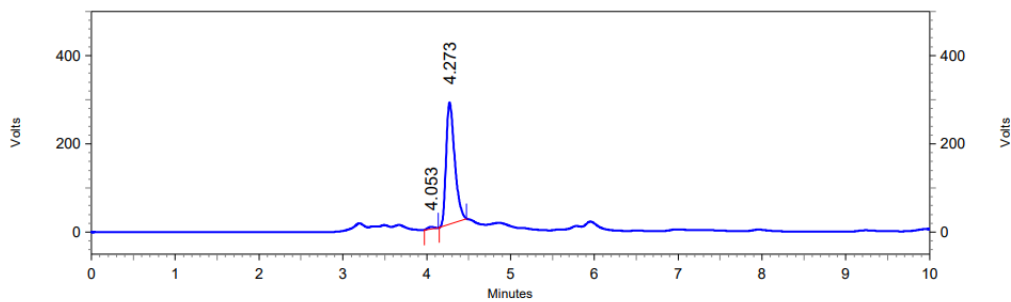

**VWD: Signal A, 254 nm Results**

| Retention Time | Area            | Area %        |
|----------------|-----------------|---------------|
| 4.053          | 381322          | 1.15          |
| 4.273          | 32829292        | 98.85         |
| <b>Totals</b>  | <b>33210614</b> | <b>100.00</b> |

5f)

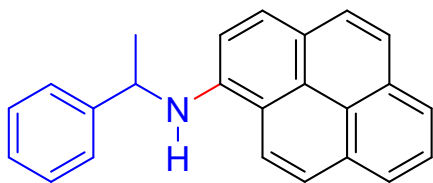

**Racemic**

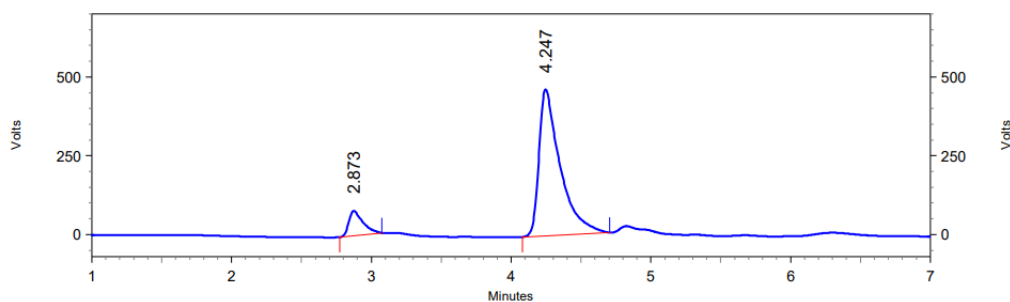

**VWD: Signal A, 230 nm Results**

| Retention Time | Area            | Area %        |
|----------------|-----------------|---------------|
| 2.873          | 9261795         | 10.17         |
| 4.247          | 81797329        | 89.83         |
| <b>Totals</b>  | <b>91059124</b> | <b>100.00</b> |

L1

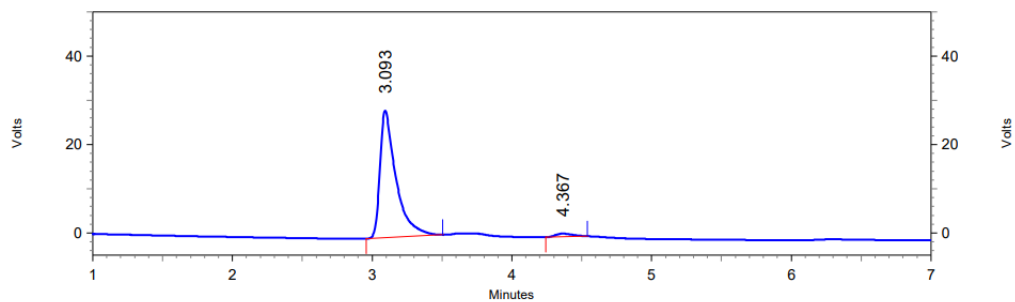

VWD: Signal A, 230 nm Results

| Retention Time | Area    | Area % |
|----------------|---------|--------|
| 3.093          | 3846037 | 97.40  |
| 4.367          | 102760  | 2.60   |

|        |         |        |
|--------|---------|--------|
| Totals | 3948797 | 100.00 |
|--------|---------|--------|

L2

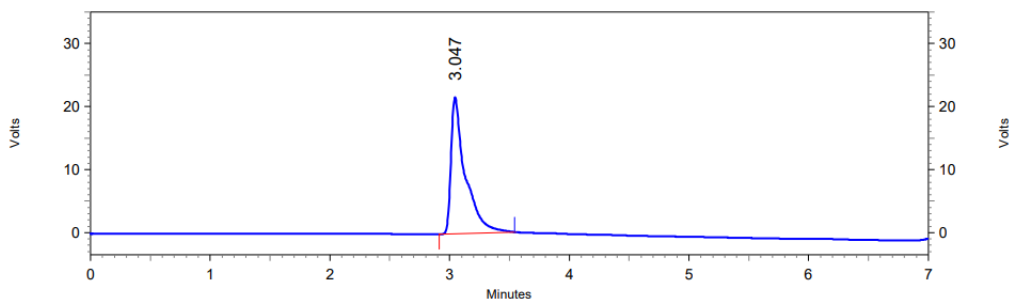

VWD: Signal A,  
230 nm Results

| Retention Time | Area    | Area % | Height | Height % |
|----------------|---------|--------|--------|----------|
| 3.047          | 3013716 | 100.00 | 362722 | 100.00   |

|        |         |        |        |        |
|--------|---------|--------|--------|--------|
| Totals | 3013716 | 100.00 | 362722 | 100.00 |
|--------|---------|--------|--------|--------|

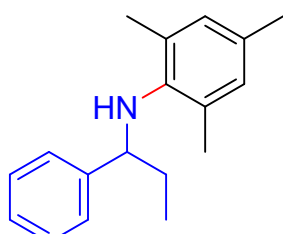

S98

5g)

Racemic

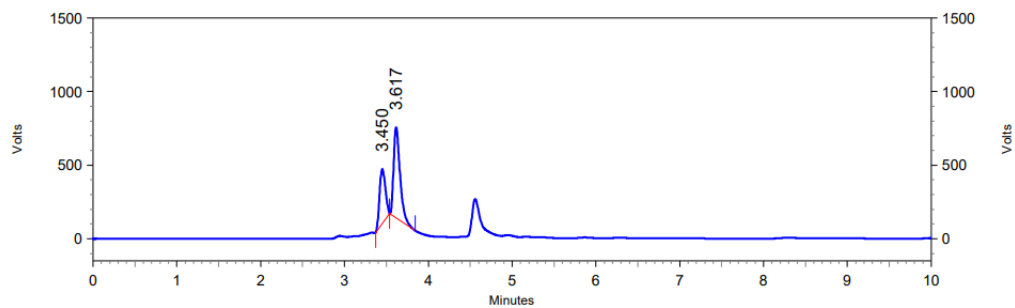

VWD: Signal A, 254 nm Results

| Retention Time | Area     | Area % |
|----------------|----------|--------|
| 3.450          | 30158112 | 35.31  |
| 3.617          | 55256616 | 64.69  |
| Totals         | 85414728 | 100.00 |

L1

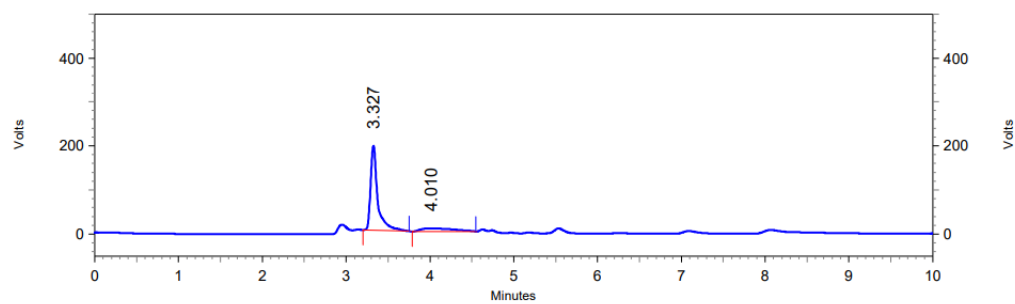

VWD: Signal A, 254 nm Results

| Retention Time | Area     | Area % |
|----------------|----------|--------|
| 3.327          | 18980255 | 85.14  |
| 4.010          | 3311944  | 14.86  |
| Totals         | 22292199 | 100.00 |

L2

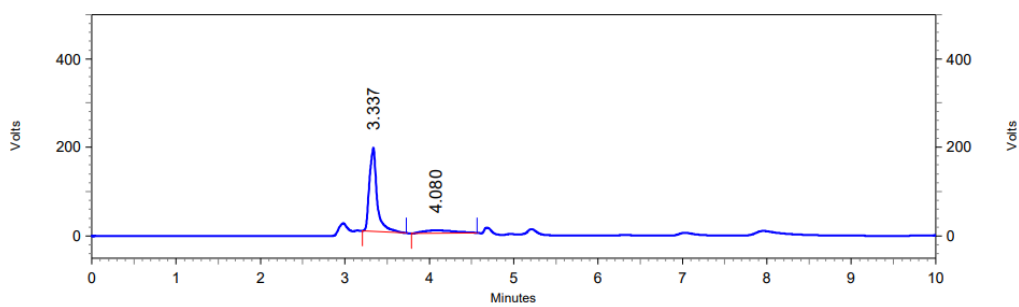

**VWD: Signal A, 254 nm Results**

| Retention Time | Area     | Area % |
|----------------|----------|--------|
| 3.337          | 19878135 | 87.41  |
| 4.080          | 2862233  | 12.59  |
| Totals         | 22740368 | 100.00 |

5h)

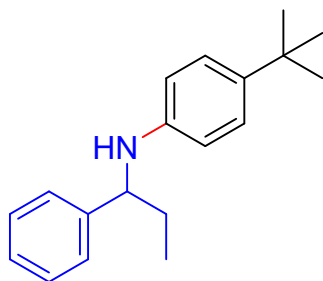

Racemic

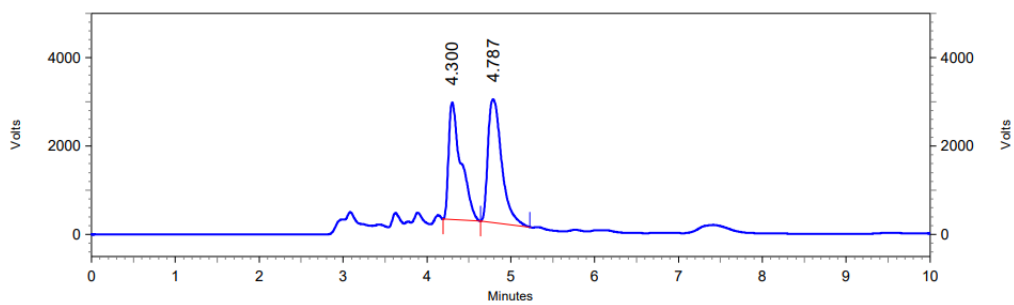

**VWD: Signal A, 254 nm Results**

| Retention Time | Area      | Area % |
|----------------|-----------|--------|
| 4.300          | 454308814 | 45.98  |
| 4.787          | 533763283 | 54.02  |
| Totals         | 988072097 | 100.00 |

L1

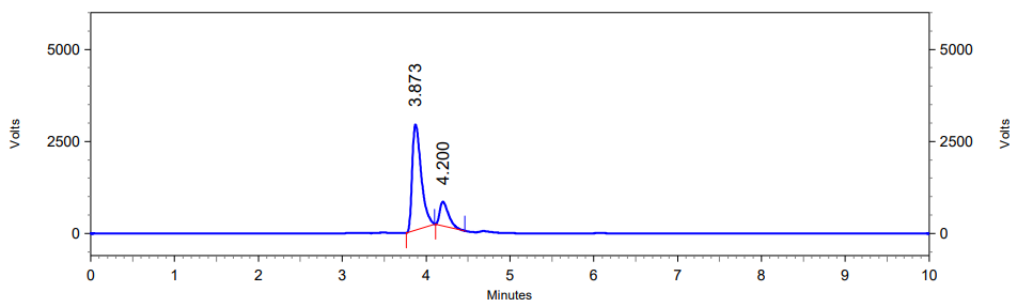

VWD: Signal A, 254 nm

| Results        |           |           |
|----------------|-----------|-----------|
| Retention Time | Area      | Area %    |
| 3.873          | 359243258 | 81.74     |
| 4.200          | 80226176  | 18.26     |
| Totals         |           | 439469434 |
|                |           | 100.00    |

L2

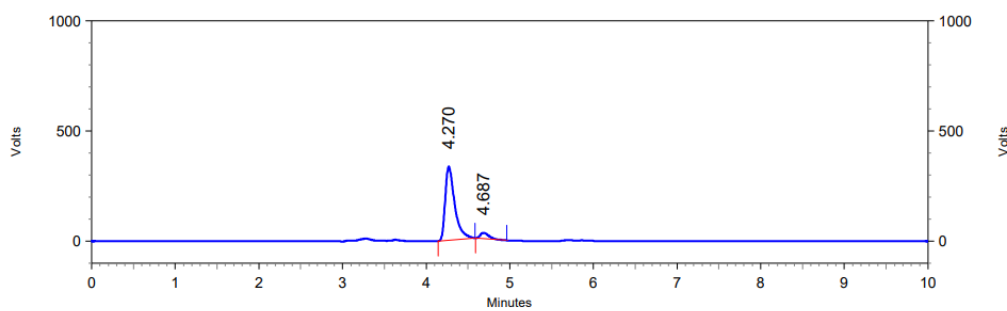

VWD: Signal A, 254 nm Results

| Retention Time | Area     | Area %   |
|----------------|----------|----------|
| 4.270          | 44134846 | 93.04    |
| 4.687          | 3300156  | 6.96     |
| Totals         |          | 47435002 |
|                |          | 100.00   |

5i)

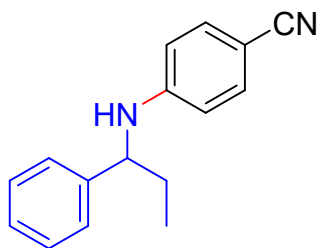

Racemic

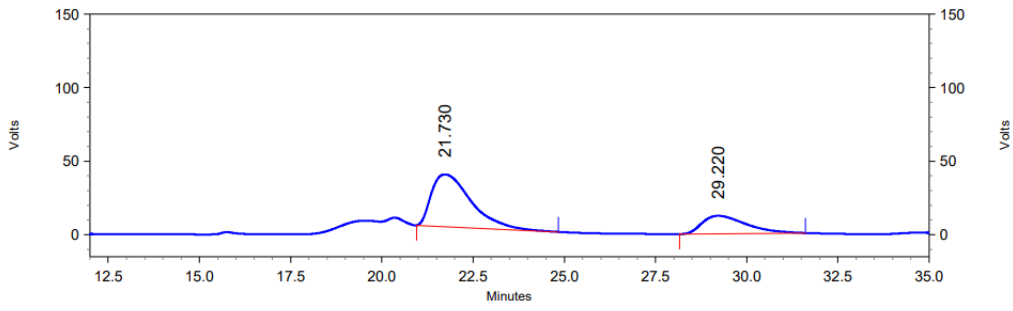

**VWD: Signal A, 254 nm Results**

| Retention Time | Area            | Area %        |
|----------------|-----------------|---------------|
| 21.730         | 45156591        | 72.57         |
| 29.220         | 17067476        | 27.43         |
| <b>Totals</b>  | <b>62224067</b> | <b>100.00</b> |

**L1**

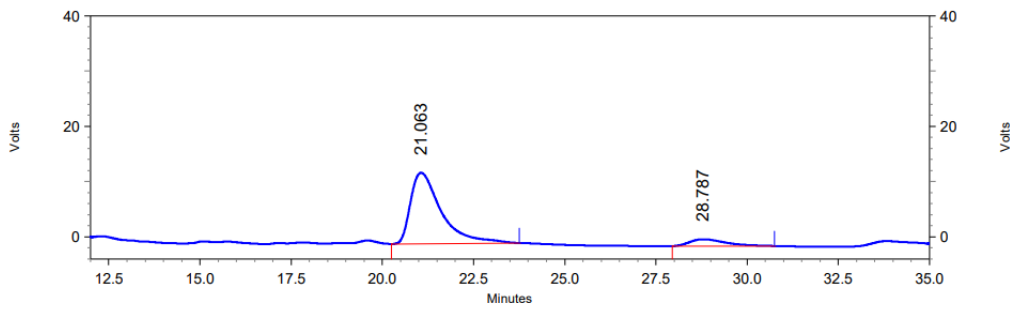

**VWD: Signal A, 254 nm Results**

| Retention Time | Area            | Area %        |
|----------------|-----------------|---------------|
| 21.063         | 12573633        | 89.88         |
| 28.787         | 1415779         | 10.12         |
| <b>Totals</b>  | <b>13989412</b> | <b>100.00</b> |

**L2**

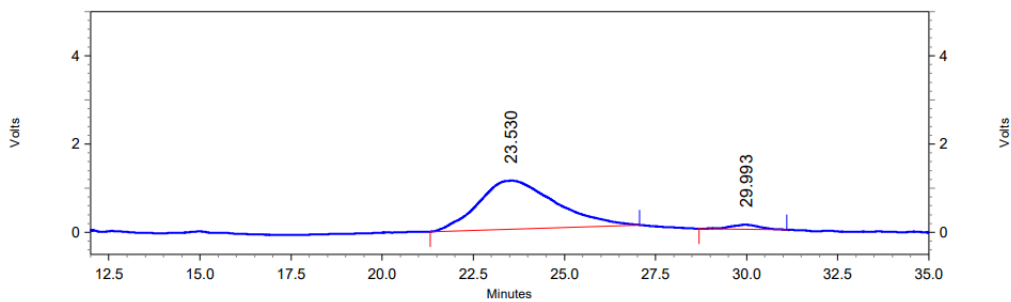

**VWD: Signal A, 254 nm Results**

| Retention Time | Area           | Area %        |
|----------------|----------------|---------------|
| 23.530         | 2712458        | 96.18         |
| 29.993         | 107601         | 3.82          |
| <b>Totals</b>  | <b>2820059</b> | <b>100.00</b> |

5j)

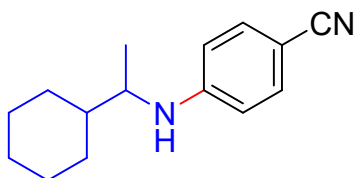

**Racemic**

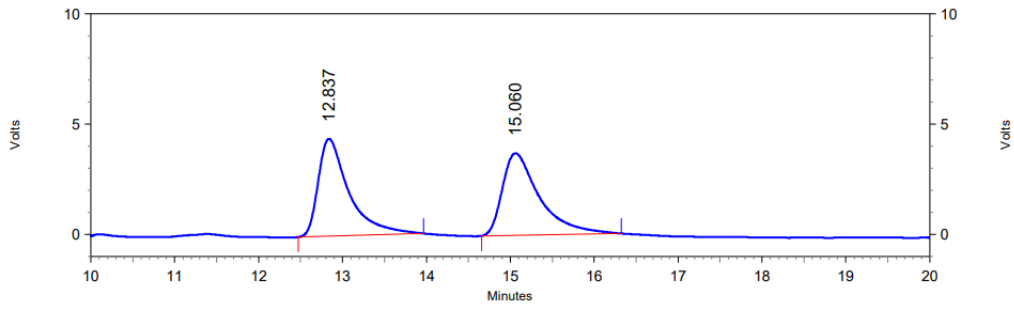

VWD: Signal A, 254 nm

Results

| Retention Time | Area    | Area % |
|----------------|---------|--------|
| 12.837         | 1885887 | 49.64  |
| 15.060         | 1913535 | 50.36  |

|        |         |        |
|--------|---------|--------|
| Totals | 3799422 | 100.00 |
|--------|---------|--------|

**L1**

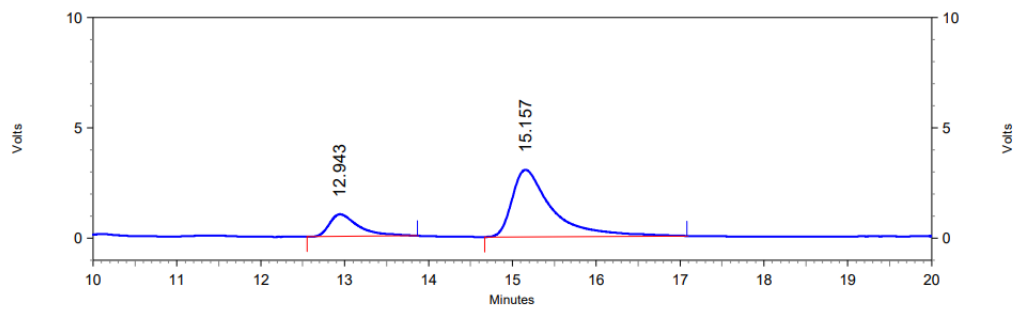

VWD: Signal A, 254 nm

Results

| Retention Time | Area    | Area % |
|----------------|---------|--------|
| 12.943         | 412565  | 19.69  |
| 15.157         | 1682521 | 80.31  |

|        |         |        |
|--------|---------|--------|
| Totals | 2095086 | 100.00 |
|--------|---------|--------|

**L2**



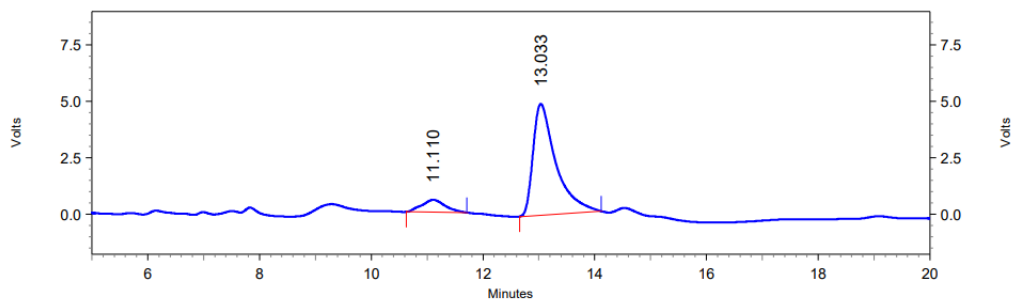

**VWD: Signal A, 254 nm Results**

| Retention Time | Area           | Area %        |
|----------------|----------------|---------------|
| 11.110         | 271263         | 10.35         |
| 13.033         | 2349577        | 89.65         |
| <b>Totals</b>  | <b>2620840</b> | <b>100.00</b> |

5k)

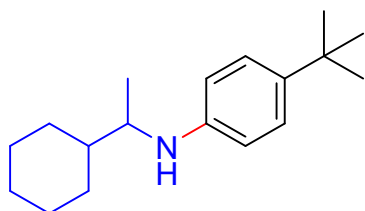

**Racemic**

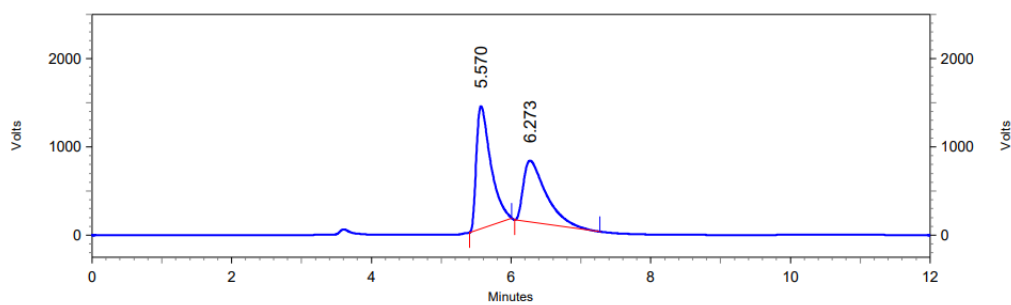

**VWD: Signal A, 254 nm Results**

| Retention Time | Area             | Area %        |
|----------------|------------------|---------------|
| 5.570          | 334954824        | 55.82         |
| 6.273          | 265108345        | 44.18         |
| <b>Totals</b>  | <b>600063169</b> | <b>100.00</b> |

**L1**

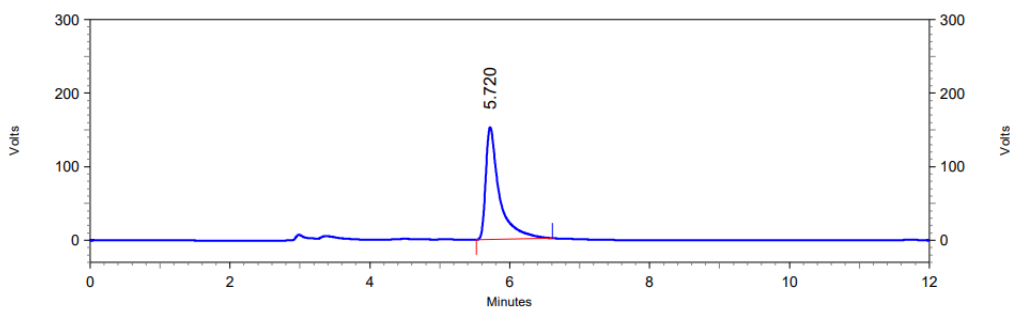

**VWD: Signal A, 254 nm Results**

| Retention Time | Area            | Area %        |
|----------------|-----------------|---------------|
| 5.720          | 34710778        | 100.00        |
| <b>Totals</b>  | <b>34710778</b> | <b>100.00</b> |

**L2**

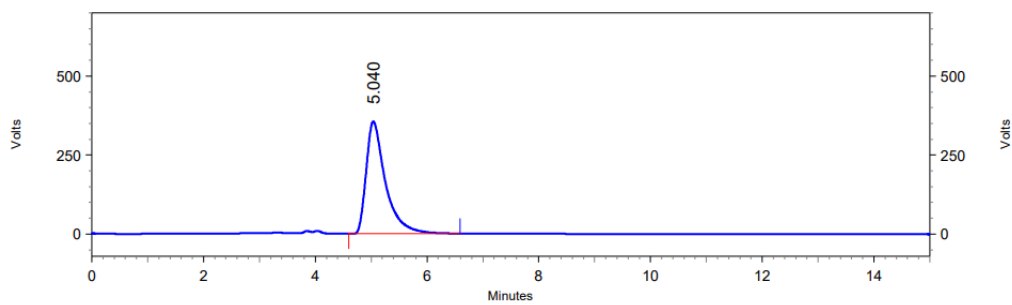

**VWD: Signal A, 254 nm Results**

| Retention Time | Area             | Area %        |
|----------------|------------------|---------------|
| 5.040          | 143219782        | 100.00        |
| <b>Totals</b>  | <b>143219782</b> | <b>100.00</b> |

5l)

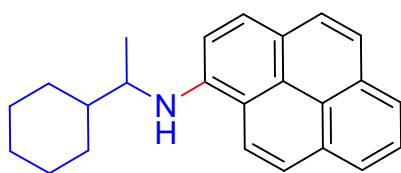

Racemic

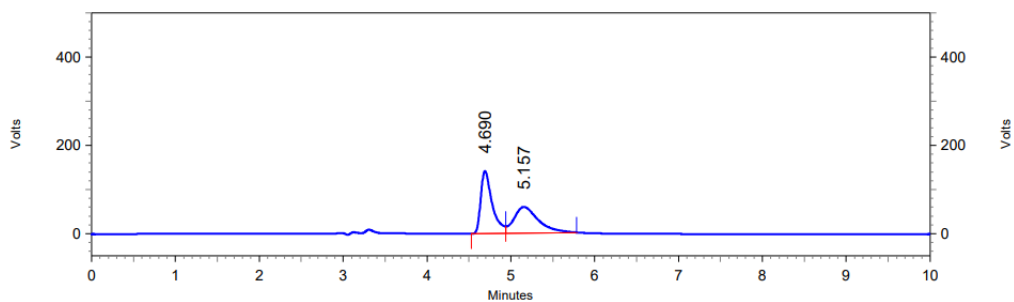

VWD: Signal A, 254 nm  
Results

| Retention Time | Area     | Area % |
|----------------|----------|--------|
| 4.690          | 22657336 | 52.94  |
| 5.157          | 20144316 | 47.06  |

|        |          |        |
|--------|----------|--------|
| Totals | 42801652 | 100.00 |
|--------|----------|--------|

L1

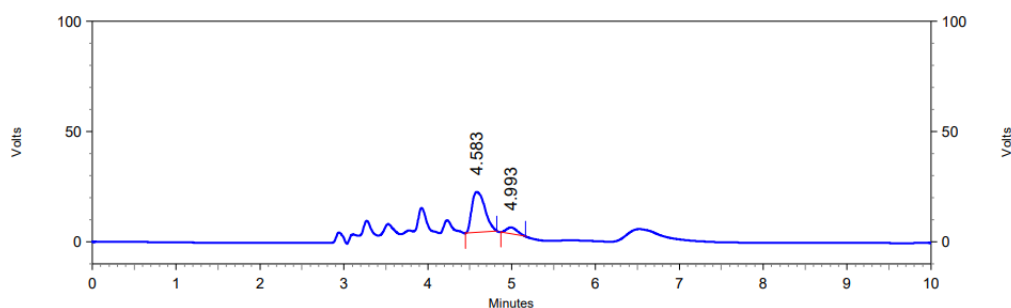

VWD: Signal A,  
254 nm Results

| Retention Time | Area    | Area % | Height | Height % |
|----------------|---------|--------|--------|----------|
| 4.583          | 3373211 | 88.32  | 308670 | 86.29    |
| 4.993          | 446091  | 11.68  | 49054  | 13.71    |

|        |         |        |        |        |
|--------|---------|--------|--------|--------|
| Totals | 3819302 | 100.00 | 357724 | 100.00 |
|--------|---------|--------|--------|--------|

L2

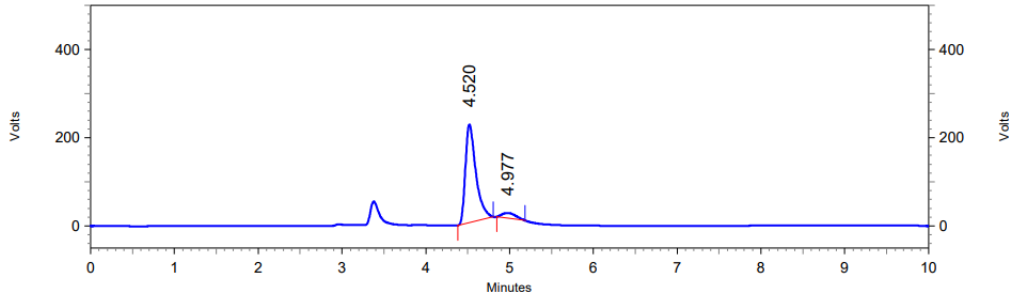

VWD: Signal A, 254 nm  
Results

| Retention Time | Area     | Area % |
|----------------|----------|--------|
| 4.520          | 32579288 | 93.34  |
| 4.977          | 2323071  | 6.66   |
| Totals         | 34902359 | 100.00 |

## S9. References

- (1) G. Berthon-Gelloz, M. A. Siegler, A. L. Spek, B. Tinant, J. N. H. Reek, and I. E. Markó, *Dalton Trans.* 2010, **39**, 1444–1446.
- (2) (a) S. G. Weber, C. Loos, F. Rominger, and B. F. Straub, *Arkivoc.* 2012, **3**, 226–242. (b) S. Pal, R. Dasgupta, and S. Khan, *Organometallics*, 2016, **35**, 3635–3640 (c) S. Pal, N. Kathewad, R. Pant, and S. Khan, *Inorg. Chem.* 2015, **54**, 10172–10183 (d) X. antreil, and S. P. Nolan, *Nat. Protoc.* 2011, **6**, 69–77.
- (3) S. S. Sen, H. W. Roesky, D. Stern, J. Henn, and D. Stalke, *J. Am. Chem. Soc.* 2010, **132**, 1123–1126.
- (4) S. Khan, S. Pal, N. Kathewad, I. Purushothaman, S. De, and P. Parameswaran, *Chem. Commun.*, 2016, **52**, 3880–3882.
- (5) R. Akhtar, S. H. Kaulage, M. P. Sangole, S. Tothadi, P. Parvathy, P. Parameswaran, K. Singh, and S. Khan, *Inorg. Chem.*, 2022, **61**, 13330–13341.
- (6) S. Nishimura, Book Reviews, *New York.* 2001, **8**, 293–300.
- (7) J. W. Raebiger, A. Miedaner, C. J. Curtis, S. M. Miller, O. P. Anderson, and D. L. DuBois, *J. Am. Chem. Soc.*, 2004, **126**, 5502–5514.
- (8) L. Falivene, Z. Cao, A. Petta, L. Serra, A. Poater, R. Oliva, V. Scarano, and L. Cavallo, *Nat. Chem.*, 2019, **11**, 872–879.
- (9) C. A. Tolman, *Chem. Rev.* 1977, **77**, 313–348.
